# Supplementary material for: HP(O)Ph2/H2O-promoted hydrodefluorination of trifluoromethyl alkenes
Source: Royal Society of Chemistry journal article supplement (doi:10.1039/d1gc04645d), 2022-01-01

## Supporting Information

### HP(O)Ph<sub>2</sub>/H<sub>2</sub>O-Promoted Hydrodefluorination of Trifluoromethyl Alkenes

Xue-Qiang Chu,<sup>\*a</sup> Li-Wen Sun,<sup>a</sup> Yu-Lan Chen,<sup>a</sup> Jia-Wei Chen,<sup>a</sup> Xuan Ying,<sup>a</sup> Mengtao Ma,<sup>b</sup>  
Zhi-Liang Shen<sup>\*a</sup>

<sup>a</sup> *Institute of Advanced Synthesis, School of Chemistry and Molecular Engineering, Nanjing Tech University, Nanjing 211816, China.*

<sup>b</sup> *Department of Chemistry and Materials Science, College of Science, Nanjing Forestry University, Nanjing 210037, China.*

### Table of Contents

|                                                                                   |          |
|-----------------------------------------------------------------------------------|----------|
| General information                                                               | Page S2  |
| General procedure for the synthesis of trifluoromethyl alkenes <b>1</b>           | Page S2  |
| General procedure for the hydrodefluorination of trifluoromethyl alkenes <b>1</b> | Page S2  |
| General procedure for the scale-up synthesis of product <b>3a</b>                 | Page S3  |
| Further transformation of products                                                | Page S4  |
| Mechanistic studies                                                               | Page S5  |
| Optimization of the reaction conditions                                           | Page S11 |
| Characterization data for products                                                | Page S13 |
| Reference                                                                         | Page S24 |
| <sup>1</sup> H, <sup>19</sup> F, and <sup>13</sup> C NMR spectra of products      | Page S25 |

## General information

Unless otherwise stated, all reagents were purchased from commercial suppliers and used without further purification. All reactions were carried out under N<sub>2</sub> atmosphere using undistilled solvent. Melting points were recorded on an electrothermal digital melting point apparatus. IR spectra were recorded on a FT-IR spectrophotometer using KBr optics. <sup>1</sup>H, <sup>19</sup>F, and <sup>13</sup>C NMR spectra were recorded in CDCl<sub>3</sub> on Bruker Avance or Joel 400 MHz spectrometers. The chemical shifts ( $\delta$ ) are reported in ppm and coupling constants (*J*) in Hz. High resolution mass spectra (HRMS) were obtained using a commercial apparatus (ESI source). Column chromatography was generally performed on silica gel (300-400 mesh) and reactions were monitored by thin layer chromatography (TLC) using UV light to visualize the course of the reactions.

### General procedure for the synthesis of trifluoromethyl alkenes 1<sup>[1]</sup>

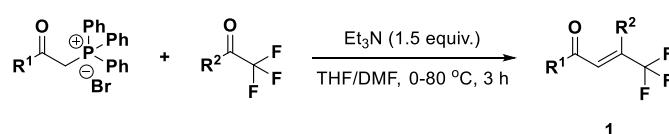

According to Zhang's reported method, a solution of triphenylphosphonium salt (7.5 mmol) and triethylamine (759 mg, 7.5 mmol) in THF (20 mL) was added a solution of a trifluoromethyl ketone (5.0 mmol) in DMF (1.6 mL) at 0 °C (ice bath). The mixture was stirred for 15 min at this temperature. After warming to room temperature, the solution was heated at 80 °C for 3 h. The solution was quenched with saturated aqueous NH<sub>4</sub>Cl solution and extracted with ethyl acetate (20 mL x 3). The organic extract was dried over MgSO<sub>4</sub> and concentrated under reduced pressure. The residue was purified by column chromatography on silica gel (petroleum ether/ethyl acetate: 100/1) to give the pure trifluoromethyl alkenes **1**.

### General procedure for the hydrodefluorination of trifluoromethyl alkenes 1

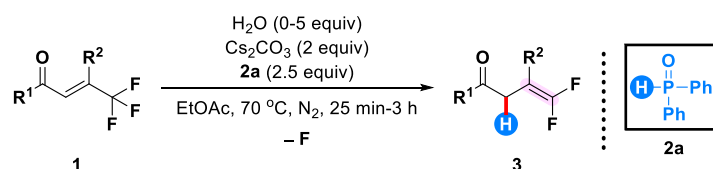

**Reaction conditions A:** A solution of trifluoromethyl alkene **1** (0.3 mmol),<sup>[1]</sup> diphenylphosphine oxide **2a** (151.6 mg, 0.75 mmol), Cs<sub>2</sub>CO<sub>3</sub> (195.6 mg, 0.6 mmol), and H<sub>2</sub>O (27.0 mg, 1.5 mmol) in EtOAc (3.5 mL) was stirred at 70 °C under N<sub>2</sub> for 3 h.

**Reaction conditions B:** A solution of trifluoromethyl alkene **1** (0.3 mmol), diphenylphosphine oxide **2a** (151.6 mg, 0.75 mmol), and Cs<sub>2</sub>CO<sub>3</sub> (195.5 mg, 0.6 mmol) in EtOAc (3.5 mL) was stirred at 70 °C under N<sub>2</sub> for 25 min.

The reaction was then quenched by saturated  $\text{NH}_4\text{Cl}$  solution (20 mL) and extracted with EtOAc (20 mL x 3). The organic layer was washed with saturated brine twice, dried over  $\text{MgSO}_4$ , filtered, and concentrated under reduced pressure. The crude product was purified by flash silica gel column chromatography (300-400 mesh) using petroleum ether/ethyl acetate as eluent to afford the pure products **3**.

### General procedure for the scale-up synthesis of product 3a

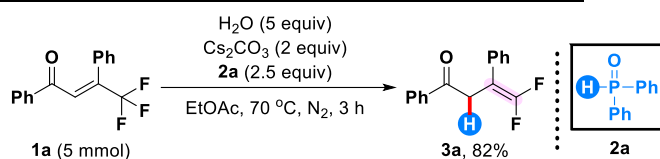

A solution of (*E*)-4,4,4-trifluoro-1,3-diphenylbut-2-en-1-one **1a** (1.38 g, 5 mmol), diphenylphosphine oxide **2a** (2.53 g, 12.5 mmol),  $\text{Cs}_2\text{CO}_3$  (3.26 g, 10 mmol), and  $\text{H}_2\text{O}$  (0.45 g, 25 mmol) in EtOAc (50 mL) was stirred at 70 °C under  $\text{N}_2$  for 3 h. The reaction was then quenched by saturated  $\text{NH}_4\text{Cl}$  solution (50 mL) and extracted with EtOAc (50 mL x 3). The organic layer was washed with saturated brine twice, dried over  $\text{MgSO}_4$ , filtered, and concentrated under reduced pressure. The crude product was purified by flash silica gel column chromatography (300-400 mesh) using petroleum ether/ethyl acetate (100/1) as eluent to afford the pure product **3a** (1.06 g, 82% yield).

## Further transformation of products

### a) The reaction of product **3a** with TMSCN

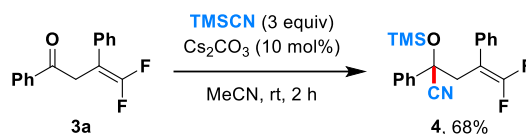

A solution of 4,4-difluoro-1,3-diphenylbut-3-en-1-one **3a** (77.5 mg, 0.3 mmol), TMSCN (89.3 mg, 0.9 mmol), and  $\text{Cs}_2\text{CO}_3$  (9.8 mg, 0.03 mmol) in MeCN (1 mL) was stirred at room temperature under  $\text{N}_2$  for 2 h. The reaction solvent was concentrated under reduced pressure. The crude product was purified by flash silica gel column chromatography (300-400 mesh) using petroleum ether/ethyl acetate (100/1) as eluent to afford the pure product **4** (73.2 mg, 68% yield).

### b) The isomerization of product **3a**

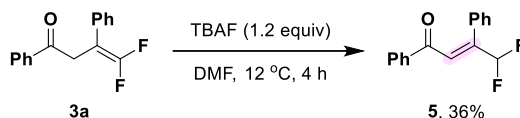

A solution of 4,4-difluoro-1,3-diphenylbut-3-en-1-one **3a** (77.5 mg, 0.3 mmol) and TBAF (1 M in THF, 0.36 mL, 0.36 mmol) in DMF (2 mL) was stirred at 12 °C under  $\text{N}_2$  for 4 h. The reaction was then quenched by saturated  $\text{NH}_4\text{Cl}$  solution (20 mL) and extracted with EtOAc (20 mL x 3). The organic layer was washed with saturated brine twice, dried over  $\text{MgSO}_4$ , filtered, and concentrated under reduced pressure. The crude product was purified by flash silica gel column chromatography (300-400 mesh) using petroleum ether/ethyl acetate (100/1) as eluent to afford the pure product **5** (27.8 mg, 36% yield).

### c) The reaction of product **3a** with $\text{PhCH}_2\text{NH}_2$

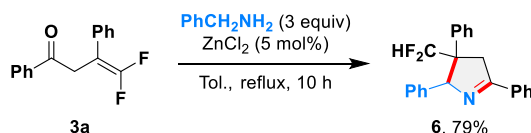

A solution of 4,4-difluoro-1,3-diphenylbut-3-en-1-one **3a** (77.5 mg, 0.3 mmol),  $\text{PhCH}_2\text{NH}_2$  (96.4 mg, 0.9 mmol), and  $\text{ZnCl}_2$  (2.0 mg, 0.015 mmol) in toluene (2 mL) was stirred at 110 °C under  $\text{N}_2$  for 10 h. The reaction was then quenched by saturated  $\text{NH}_4\text{Cl}$  solution (20 mL) and extracted with EtOAc (20 mL x 3). The organic layer was washed with saturated brine twice, dried over  $\text{MgSO}_4$ , filtered, and concentrated under reduced pressure. The crude product was purified by flash silica gel column chromatography (300-400 mesh) using petroleum ether/ethyl acetate (50/1) as eluent to afford the pure product **6** (81.9 mg, 79% yield).

### d) The reduction reaction of product **3a**

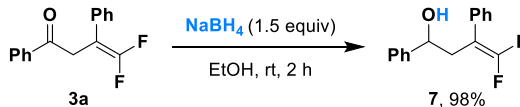

A solution of 4,4-difluoro-1,3-diphenylbut-3-en-1-one **3a** (77.5 mg, 0.3 mmol), and  $\text{NaBH}_4$  (17.0 mg, 0.45 mmol) in EtOH (2 mL) was stirred at room temperature under  $\text{N}_2$  for 2 h. The reaction was then quenched by saturated  $\text{NH}_4\text{Cl}$  solution (20 mL) and extracted with EtOAc (20 mL x 3).

The organic layer was washed with saturated brine twice, dried over MgSO<sub>4</sub>, filtered, and concentrated under reduced pressure. The crude product was purified by flash silica gel column chromatography (300-400 mesh) using petroleum ether/ethyl acetate (20/1) as eluent to afford the pure product **7** (76.4 mg, 98% yield).

## Mechanistic studies

### 1) Radical trapping experiment

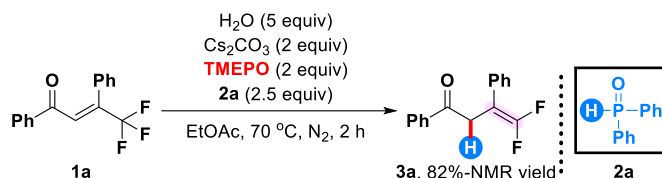

A solution of (*E*)-4,4,4-trifluoro-1,3-diphenylbut-2-en-1-one **1a** (82.9 mg, 0.3 mmol), diphenylphosphine oxide **2a** (151.6 mg, 0.75 mmol), Cs<sub>2</sub>CO<sub>3</sub> (195.6 mg, 0.6 mmol), H<sub>2</sub>O (27.0 mg, 1.5 mmol), and 2,2,6,6-tetramethylpiperidinoxy (TEMPO, 93.7 mg, 0.6 mmol) in EtOAc (3.5 mL) was stirred at 70 °C under N<sub>2</sub> for 2 h. The reaction was then quenched by saturated NH<sub>4</sub>Cl solution (20 mL) and extracted with EtOAc (20 mL x 3). 82%-NMR yield of product **3a** was obtained as determined by <sup>19</sup>F NMR analysis of the reaction mixture with 4-chlorobenzotrifluoride (0.1 mmol) as an internal standard. **This result suggested that hydrodefluorination of trifluoromethyl alkenes might not proceed through a radical pathway.**

### 2) D-labeling experiments

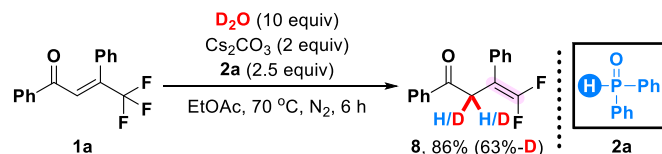

A solution of (*E*)-4,4,4-trifluoro-1,3-diphenylbut-2-en-1-one **1a** (82.9 mg, 0.3 mmol), diphenylphosphine oxide **2a** (151.6 mg, 0.75 mmol), Cs<sub>2</sub>CO<sub>3</sub> (195.6 mg, 0.6 mmol), and D<sub>2</sub>O (54.0 mg, 3.0 mmol) in EtOAc (3.5 mL) was stirred at 70 °C under N<sub>2</sub> for 6 h. The reaction was then quenched by saturated NH<sub>4</sub>Cl solution (20 mL) and extracted with EtOAc (20 mL x 3). The organic layer was washed with saturated brine twice, dried over MgSO<sub>4</sub>, filtered, and concentrated under reduced pressure. The crude product was purified by flash silica gel column chromatography (300-400 mesh) using petroleum ether/ethyl acetate (100/1) as eluent to afford the pure product **8** (86% yield, 63%-D incorporation). The <sup>1</sup>H NMR analysis of product **8** showed that two deuterium atoms were incorporated into the α-position of carbonyl group with a ratio of 1:1.

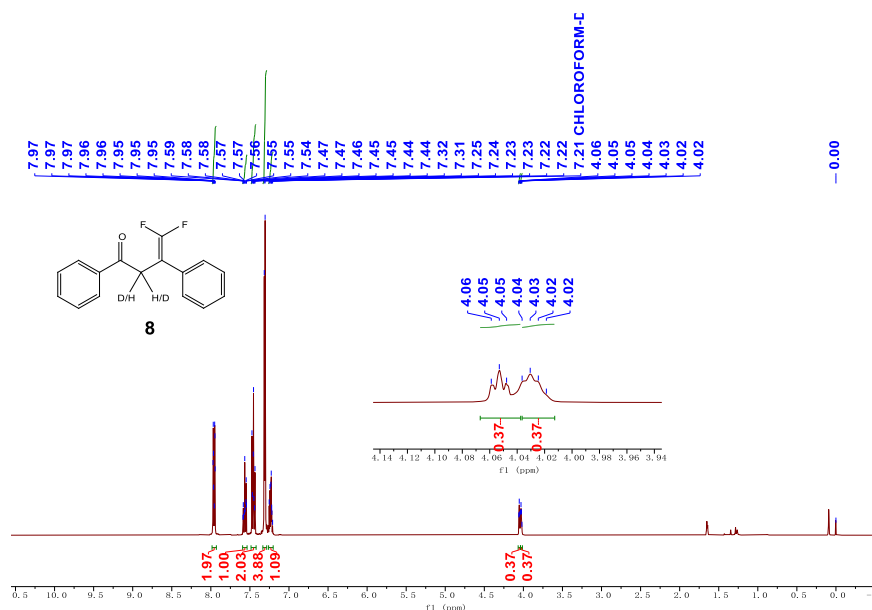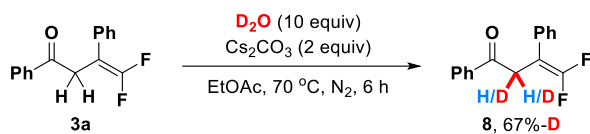

A solution of 4,4-difluoro-1,3-diphenylbut-3-en-1-one **3a** (77.5 mg, 0.3 mmol),  $\text{Cs}_2\text{CO}_3$  (195.6 mg, 0.6 mmol), and  $\text{D}_2\text{O}$  (54.0 mg, 3.0 mmol) in EtOAc (3.5 mL) was stirred at 70 °C under  $\text{N}_2$  for 6 h. The reaction was then quenched by saturated  $\text{NH}_4\text{Cl}$  solution (20 mL) and extracted with EtOAc (20 mL x 3). The organic layer was washed with saturated brine twice, dried over  $\text{MgSO}_4$ , filtered, and concentrated under reduced pressure. The crude product **8** was directly analyzed by  $^1\text{H}$  NMR, which showed that two deuterium atoms were incorporated into the  $\alpha$ -position of carbonyl group with a ratio of 1:1 (67%-D incorporation). **These results suggested that the deuterium atoms might be incorporated by keto-enol tautomerism of product 3a under basic conditions rather than direct hydrodefluorination by using water as a hydrogen source.**

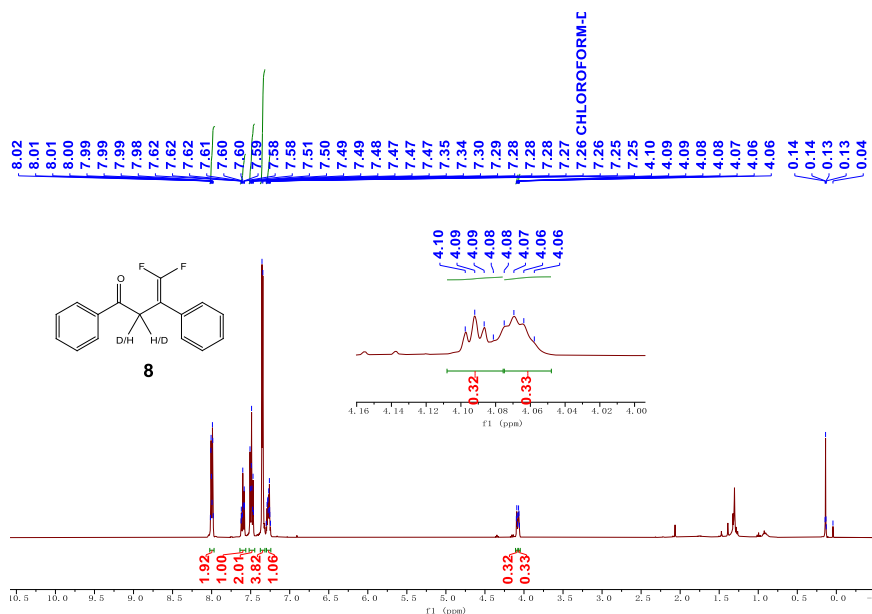

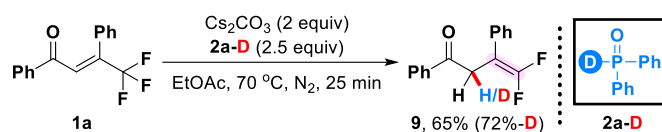

A solution of (*E*)-4,4,4-trifluoro-1,3-diphenylbut-2-en-1-one **1a** (82.9 mg, 0.3 mmol), diphenylphosphine oxide-*d* **2a-D** (151.6 mg, 0.75 mmol),<sup>[2]</sup> and Cs<sub>2</sub>CO<sub>3</sub> (195.6 mg, 0.6 mmol) in EtOAc (3.5 mL) was stirred at 70 °C under N<sub>2</sub> for 25 min. The reaction was then quenched by saturated NH<sub>4</sub>Cl solution (20 mL) and extracted with EtOAc (20 mL x 3). The organic layer was washed with saturated brine twice, dried over MgSO<sub>4</sub>, filtered, and concentrated under reduced pressure. The crude product was purified by flash silica gel column chromatography (300-400 mesh) using petroleum ether/ethyl acetate (100/1) as eluent to afford the pure product **9** (65% yield, 72%-D incorporation). The <sup>1</sup>H NMR analysis of product **9** showed that only one deuterium atom was incorporated into the α-position of carbonyl group. **This result suggested that the hydrogen atom in the product might come from the HP(O)Ph<sub>2</sub> component.**

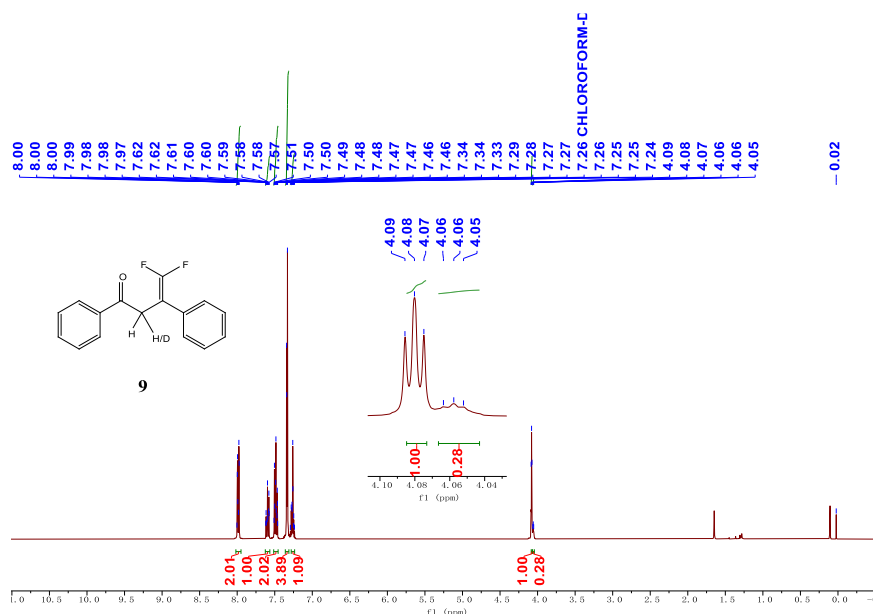

### 3) Analysis of possible reaction intermediates

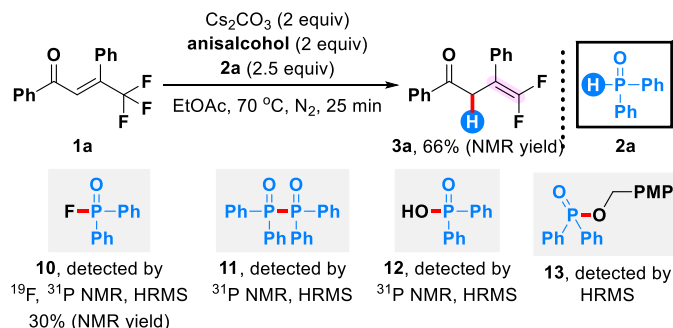

A solution of (*E*)-4,4,4-trifluoro-1,3-diphenylbut-2-en-1-one **1a** (82.9 mg, 0.3 mmol), diphenylphosphine oxide **2a** (151.6 mg, 0.75 mmol), Cs<sub>2</sub>CO<sub>3</sub> (195.6 mg, 0.6 mmol), and (4-methoxyphenyl)methanol (41.4 mg, 0.3 mmol) in EtOAc (3.5 mL) was stirred at 70 °C under N<sub>2</sub> for 25 min. 66%-NMR yield of product **3a** and 30%-NMR yield of diphenylphosphinic

fluoride (**10**)<sup>[2]</sup> were formed as determined by <sup>19</sup>F NMR analysis of the reaction mixture with 4-chlorobenzotrifluoride (0.1 mmol) as an internal standard. The existence of diphenylphosphinic fluoride (**10**) was also determined by <sup>31</sup>P analysis of the reaction mixture.

#### <sup>19</sup>F NMR<sup>[1-3]</sup> analysis of the reaction mixture:

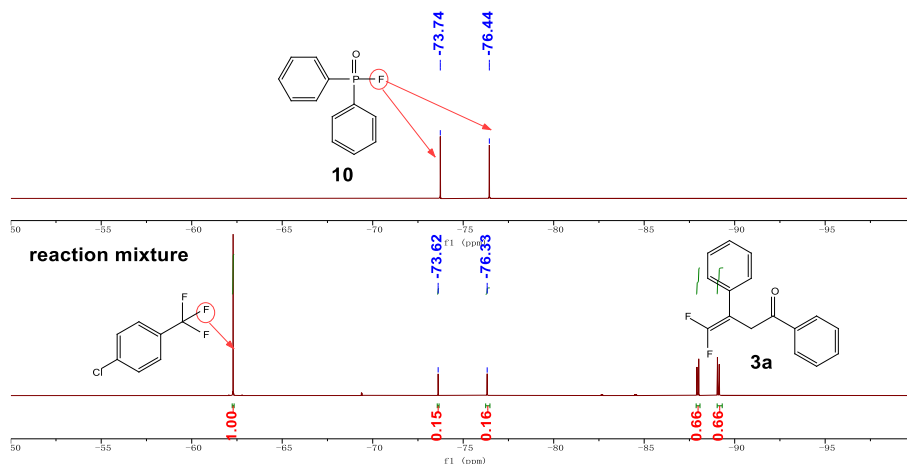

#### <sup>31</sup>P NMR analysis of the reaction mixture:

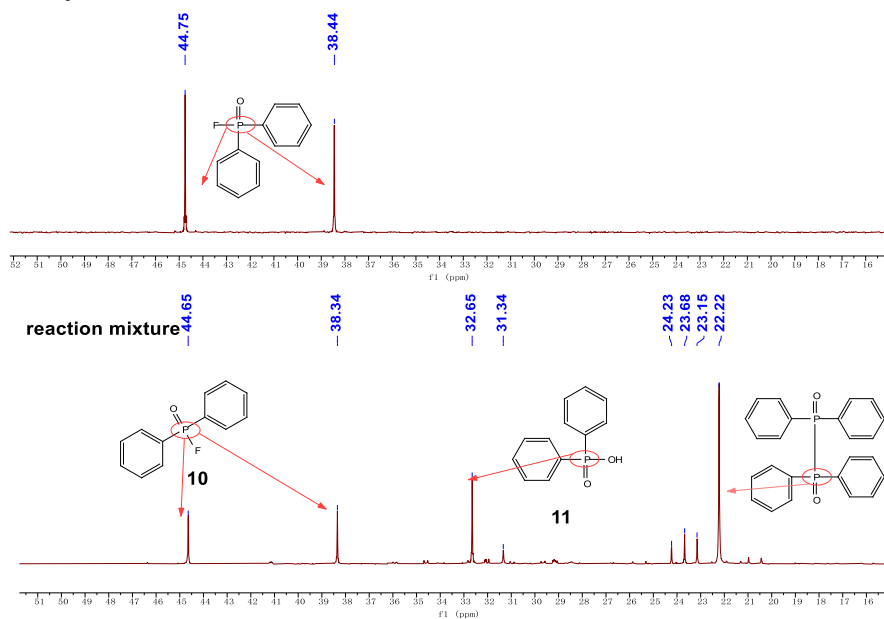

In addition, HRMS analysis of the reaction mixture suggested the involvement of intermediates **10-13**.

## Elemental Composition Report

Page 1

## Single Mass Analysis

Tolerance = 5.0 mDa / DBE: min = -1.5, max = 50.0

Element prediction: Off

Number of isotope peaks used for i-FIT = 3

Monoisotopic Mass, Even Electron Ions

46 formula(e) evaluated with 1 results within limits (up to 50 best isotopic matches for each mass)

Elements Used:

C: 12-13 H: 10-11 N: 0-2 O: 1-2 F: 1-4 P: 1-2

slw-1112-1 (1.900) Is (1.00,1.00) C<sub>12</sub>H<sub>10</sub>FOP

2: TOF MS ES+

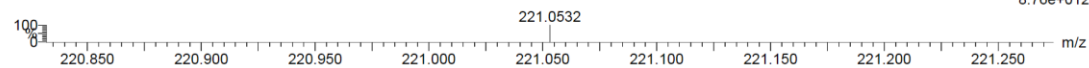

Minimum: -1.5  
Maximum: 50.0

| Mass     | Calc. Mass | mDa | PPM | DBE | i-FIT | Norm | Conf (%) | Formula       |
|----------|------------|-----|-----|-----|-------|------|----------|---------------|
| 221.0532 | 221.0532   | 0.0 | 0.0 | 7.5 | 75.6  | n/a  | n/a      | C12 H11 O F P |

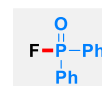

10

C<sub>12</sub>H<sub>11</sub>FOP<sup>+</sup>[M+H]<sup>+</sup>: 221.0526

found: 221.0532

## Elemental Composition Report

Page 1

## Single Mass Analysis

Tolerance = 5.0 mDa / DBE: min = -1.5, max = 50.0

Element prediction: Off

Number of isotope peaks used for i-FIT = 3

Monoisotopic Mass, Even Electron Ions

1 formula(e) evaluated with 1 results within limits (up to 50 best isotopic matches for each mass)

Elements Used:

C: 24-25 H: 20-22 O: 1-2 P: 1-2

slw-1112-1 (2.071) Is (1.00,1.00) C<sub>24</sub>H<sub>20</sub>O<sub>2</sub>P<sub>2</sub>

2: TOF MS ES+

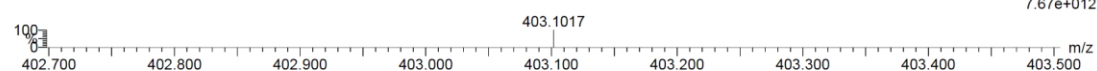

Minimum: -1.5  
Maximum: 50.0

| Mass     | Calc. Mass | mDa | PPM | DBE  | i-FIT | Norm | Conf (%) | Formula       |
|----------|------------|-----|-----|------|-------|------|----------|---------------|
| 403.1017 | 403.1017   | 0.0 | 0.0 | 15.5 | 75.7  | n/a  | n/a      | C24 H21 O2 P2 |

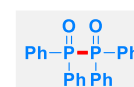

11

C<sub>24</sub>H<sub>21</sub>O<sub>2</sub>P<sub>2</sub><sup>+</sup>[M+H]<sup>+</sup>: 403.1011

found: 403.1017

## Elemental Composition Report

Page 1

## Single Mass Analysis

Tolerance = 5.0 mDa / DBE: min = -1.5, max = 50.0

Element prediction: Off

Number of isotope peaks used for i-FIT = 3

Monoisotopic Mass, Even Electron Ions

3 formula(e) evaluated with 1 results within limits (up to 50 best isotopic matches for each mass)

Elements Used:

C: 10-25 H: 10-22 O: 1-2 P: 1-2

slw-1112-1 (1.388) Is (1.00,1.00) C<sub>12</sub>H<sub>11</sub>O<sub>2</sub>P

2: TOF MS ES+

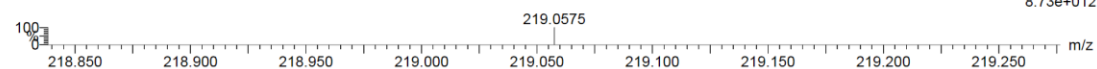

Minimum: -1.5  
Maximum: 50.0

| Mass     | Calc. Mass | mDa | PPM | DBE | i-FIT | Norm | Conf (%) | Formula      |
|----------|------------|-----|-----|-----|-------|------|----------|--------------|
| 219.0575 | 219.0575   | 0.0 | 0.0 | 7.5 | 75.5  | n/a  | n/a      | C12 H12 O2 P |

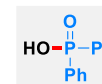

12

C<sub>12</sub>H<sub>12</sub>O<sub>2</sub>P<sup>+</sup>[M+H]<sup>+</sup>: 219.0569

found: 219.0575

## Elemental Composition Report

Page 1

### Single Mass Analysis

Tolerance = 5.0 mDa / DBE: min = -1.5, max = 50.0

Element prediction: Off

Number of isotope peaks used for i-FIT = 3

Monoisotopic Mass, Even Electron Ions

6 formula(e) evaluated with 1 results within limits (up to 50 best isotopic matches for each mass)

Elements Used:

C: 10-25 H: 10-22 O: 1-3 P: 1-2

slw-1112-1 (1.217) Is (1.00,1.00) C<sub>20</sub>H<sub>19</sub>O<sub>3</sub>P

2: TOF MS ES+

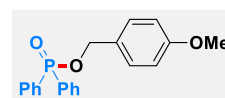

13

C<sub>20</sub>H<sub>20</sub>O<sub>3</sub>P<sup>+</sup>

[M+H]<sup>+</sup>: 339.1145

found: 339.1150

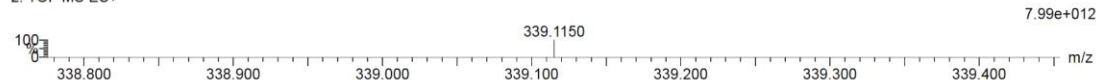

Minimum: -1.5  
Maximum: 5.0 10.0 50.0

| Mass     | Calc. Mass | mDa | PPM | DBE  | i-FIT | Norm | Conf (%) | Formula                                          |
|----------|------------|-----|-----|------|-------|------|----------|--------------------------------------------------|
| 339.1150 | 339.1150   | 0.0 | 0.0 | 11.5 | 75.7  | n/a  | n/a      | C <sub>20</sub> H <sub>20</sub> O <sub>3</sub> P |

These results suggested that intermediates 10-13 might involve in the reaction mixture.

### 4) Investigation on the effect of the H<sub>2</sub>O

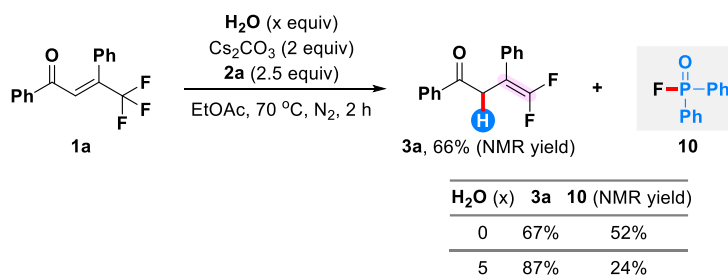

A solution of (*E*)-4,4,4-trifluoro-1,3-diphenylbut-2-en-1-one **1a** (82.9 mg, 0.3 mmol), diphenylphosphine oxide **2a** (151.6 mg, 0.75 mmol), Cs<sub>2</sub>CO<sub>3</sub> (195.6 mg, 0.6 mmol), and H<sub>2</sub>O (0-1.5 mmol) in EtOAc (3.5 mL) was stirred at 70 °C under N<sub>2</sub> for 2 h. The reaction was then quenched by saturated NH<sub>4</sub>Cl solution (20 mL) and extracted with EtOAc (20 mL x 3). NMR yield of product **3a** and diphenylphosphinic fluoride (**10**) were determined by <sup>19</sup>F NMR analysis of the reaction mixture with 4-chlorobenzotrifluoride (0.1 mmol) as an internal standard. **These results suggested that the addition of water might promote the transformation of *in situ* formed diphenylphosphinic fluoride (**10**) to increase the yield of desired product **3a**.**

## Optimization of reaction conditions

Table S1. Optimization of reaction conditions<sup>a</sup>

Reaction scheme: 1a  $\xrightarrow[\text{Sol., Temp., N}_2, \text{ time}]{\text{base (x equiv), reductant 2 (y equiv), -F}}$  3a

| Entry | <b>2</b> (y equiv) | Base (x equiv)                      | Solvent           | Temp. (°C) | Time   | Yield (%) <sup>b</sup> |
|-------|--------------------|-------------------------------------|-------------------|------------|--------|------------------------|
| 1     | <b>2a</b> (2)      | Cs <sub>2</sub> CO <sub>3</sub> (3) | DCE               | 70         | 12 h   | 56                     |
| 2     | <b>2a</b> (2)      | Cs <sub>2</sub> CO <sub>3</sub> (3) | MeCN              | 70         | 12 h   | 4                      |
| 3     | <b>2a</b> (2)      | Cs <sub>2</sub> CO <sub>3</sub> (3) | DMSO              | 70         | 12 h   | 0                      |
| 4     | <b>2a</b> (2)      | Cs <sub>2</sub> CO <sub>3</sub> (3) | DMF               | 70         | 12 h   | 0                      |
| 5     | <b>2a</b> (2)      | Cs <sub>2</sub> CO <sub>3</sub> (3) | EtOH              | 70         | 12 h   | 0                      |
| 6     | <b>2a</b> (2)      | Cs <sub>2</sub> CO <sub>3</sub> (3) | EtOAc             | 70         | 12 h   | 58                     |
| 7     | <b>2a</b> (2)      | Cs <sub>2</sub> CO <sub>3</sub> (3) | MeNO <sub>2</sub> | 70         | 12 h   | 25                     |
| 8     | <b>2a</b> (2)      | Cs <sub>2</sub> CO <sub>3</sub> (3) | NMP               | 70         | 12 h   | 10                     |
| 9     | <b>2a</b> (2)      | Cs <sub>2</sub> CO <sub>3</sub> (3) | DMA               | 70         | 12 h   | 10                     |
| 10    | <b>2a</b> (2)      | Cs <sub>2</sub> CO <sub>3</sub> (3) | NMP               | r.t.       | 24 h   | 18                     |
| 11    | <b>2a</b> (2)      | Cs <sub>2</sub> CO <sub>3</sub> (3) | NMP               | 50         | 24 h   | 18                     |
| 12    | <b>2a</b> (2)      | Cs <sub>2</sub> CO <sub>3</sub> (3) | NMP               | 100        | 24 h   | trace                  |
| 13    | <b>2a</b> (2)      | Cs <sub>2</sub> CO <sub>3</sub> (3) | NMP               | 120        | 24 h   | trace                  |
| 14    | <b>2a</b> (2)      | Cs <sub>2</sub> CO <sub>3</sub> (3) | EtOAc             | 70         | 25 min | 57 (53) <sup>c</sup>   |
| 15    | --                 | Cs <sub>2</sub> CO <sub>3</sub> (3) | EtOAc             | 70         | 12 h   | trace                  |
| 16    | <b>2a</b> (0.1)    | Cs <sub>2</sub> CO <sub>3</sub> (3) | EtOAc             | 70         | 25 min | 0                      |
| 17    | <b>2a</b> (1)      | Cs <sub>2</sub> CO <sub>3</sub> (3) | EtOAc             | 70         | 25 min | 32                     |
| 18    | <b>2a</b> (1.5)    | Cs <sub>2</sub> CO <sub>3</sub> (3) | EtOAc             | 70         | 25 min | 43                     |
| 19    | <b>2a</b> (2.5)    | Cs <sub>2</sub> CO <sub>3</sub> (3) | EtOAc             | 70         | 25 min | 62 (60) <sup>c</sup>   |
| 20    | <b>2a</b> (2.5)    | Cs <sub>2</sub> CO <sub>3</sub> (3) | EtOAc             | rt         | 25 min | 57                     |
| 21    | <b>2a</b> (2.5)    | Cs <sub>2</sub> CO <sub>3</sub> (3) | EtOAc             | 70         | 3.5 h  | 58 (55) <sup>c</sup>   |
| 22    | <b>2a</b> (2.5)    | NaHCO <sub>3</sub> (3)              | EtOAc             | 70         | 25 min | 0                      |
| 23    | <b>2a</b> (2.5)    | K <sub>3</sub> PO <sub>4</sub> (3)  | EtOAc             | 70         | 25 min | 0                      |
| 24    | <b>2a</b> (2.5)    | K <sub>3</sub> PO <sub>4</sub> (3)  | EtOAc             | 70         | 24 h   | trace                  |
| 25    | <b>2a</b> (2.5)    | NaOAc (3)                           | EtOAc             | 70         | 25 min | 0                      |
| 26    | <b>2a</b> (2.5)    | Et <sub>3</sub> N (3)               | EtOAc             | 70         | 25 min | 0                      |
| 27    | <b>2a</b> (2.5)    | DABCO (3)                           | EtOAc             | 70         | 25 min | 0                      |
| 28    | <b>2a</b> (2.5)    | LiOH (3)                            | EtOAc             | 70         | 25 min | 0                      |
| 29    | <b>2b</b> (2.5)    | Cs <sub>2</sub> CO <sub>3</sub> (3) | EtOAc             | 70         | 25 min | 0                      |
| 30    | <b>2c</b> (2.5)    | Cs <sub>2</sub> CO <sub>3</sub> (3) | EtOAc             | 70         | 25 min | 0                      |
| 31    | <b>2d</b> (2.5)    | Cs <sub>2</sub> CO <sub>3</sub> (3) | EtOAc             | 70         | 25 min | <5 (>90) <sup>d</sup>  |
| 32    | <b>2e</b> (2.5)    | Cs <sub>2</sub> CO <sub>3</sub> (3) | EtOAc             | 70         | 25 min | <5 (>90) <sup>d</sup>  |

**Table S1. Continued.**

| Entry | <b>2</b> (y equiv) | Base (x equiv)                        | Solvent | Temp. (°C) | Time   | Yield (%) <sup>b</sup> |
|-------|--------------------|---------------------------------------|---------|------------|--------|------------------------|
| 33    | <b>2f</b> (2.5)    | Cs <sub>2</sub> CO <sub>3</sub> (3)   | EtOAc   | 70         | 25 min | trace                  |
| 34    | <b>2g</b> (2.5)    | Cs <sub>2</sub> CO <sub>3</sub> (3)   | EtOAc   | 70         | 25 min | trace                  |
| 35    | <b>2h</b> (2.5)    | Cs <sub>2</sub> CO <sub>3</sub> (3)   | EtOAc   | 70         | 25 min | trace                  |
| 36    | <b>2a</b> (2.5)    | Cs <sub>2</sub> CO <sub>3</sub> (0.5) | EtOAc   | 70         | 25 min | 49                     |
| 37    | <b>2a</b> (2.5)    | Cs <sub>2</sub> CO <sub>3</sub> (1.2) | EtOAc   | 70         | 25 min | 62                     |
| 38    | <b>2a</b> (2.5)    | Cs <sub>2</sub> CO <sub>3</sub> (1.5) | EtOAc   | 70         | 25 min | 65                     |
| 39    | <b>2a</b> (2.5)    | Cs <sub>2</sub> CO <sub>3</sub> (2.0) | EtOAc   | 70         | 25 min | 70 (67) <sup>c</sup>   |
| 40    | <b>2a</b> (2.5)    | Cs <sub>2</sub> CO <sub>3</sub> (2.0) | EtOAc   | 70         | 3 h    | 84 (81) <sup>c,e</sup> |
| 41    | <b>2a</b> (2.5)    | Cs <sub>2</sub> CO <sub>3</sub> (2.0) | EtOAc   | 70         | 3 h    | 90 (87) <sup>c,f</sup> |
| 42    | <b>2a</b> (1.0)    | Cs <sub>2</sub> CO <sub>3</sub> (1.0) | EtOAc   | 70         | 3 h    | 65 <sup>f</sup>        |
| 43    | <b>2a</b> (2.5)    | Cs <sub>2</sub> CO <sub>3</sub> (2.0) | EtOAc   | 70         | 3 h    | trace <sup>c,g</sup>   |
| 44    | <b>2a</b> (2.5)    | K <sub>2</sub> CO <sub>3</sub> (2.0)  | EtOAc   | 70         | 3 h    | 48 <sup>f</sup>        |
| 45    | PhCHO (2.5)        | Cs <sub>2</sub> CO <sub>3</sub> (2.0) | EtOAc   | 70         | 3 h    | 0 <sup>f</sup>         |

<sup>a</sup> Reaction conditions: **1a** (0.3 mmol), **2** (0-0.75 mmol), and base (0-0.9 mmol) in solvent (3.5 mL) at r.t.-120 °C under N<sub>2</sub>. <sup>b</sup> Yields were determined by <sup>19</sup>F NMR analysis with 4-chlorobenzotrifluoride (0.1 mmol) as an internal standard. <sup>c</sup> Isolated yield. <sup>d</sup> Recovery yield of **1a**. <sup>e</sup> H<sub>2</sub>O (10 equiv.) was added. <sup>f</sup> H<sub>2</sub>O (5 equiv.) was added. <sup>g</sup> H<sub>2</sub>O (20 equiv.) was added.

### Characterization data for products<sup>[1,3]</sup>

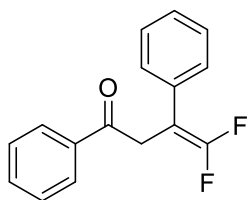

#### **4,4-Difluoro-1,3-diphenylbut-3-en-1-one (3a):**

Yield = 87% (67.5 mg). White solid. M.p. 66.7–68.4 °C.

Purified by flash silica gel column chromatography through silica gel (petroleum ether/ethyl acetate, 100/1).

**<sup>1</sup>H NMR (400 MHz, CDCl<sub>3</sub>):**  $\delta$  = 8.02-7.96 (m, 2H), 7.63-7.56 (m, 1H), 7.52-7.45 (m, 2H), 7.37-7.31 (m, 4H), 7.30-7.22 (m, 1H), 4.08 (t,  $J$  = 2.2 Hz, 2H) ppm.

**<sup>19</sup>F NMR (376 MHz, CDCl<sub>3</sub>):**  $\delta$  = -87.93 (d,  $J$  = 37.2 Hz, 1F), -89.08 (d,  $J$  = 37.3 Hz, 1F) ppm.

**<sup>13</sup>C NMR (100 MHz, CDCl<sub>3</sub>):**  $\delta$  = 195.3 (t,  $J_{C-F}$  = 2.7 Hz), 154.7 (dd,  $J_{C-F}$  = 292.4, 288.0 Hz), 136.2, 133.4, 128.7, 128.5, 128.1, 128.0 (t,  $J_{C-F}$  = 3.6 Hz), 127.4, 87.1 (dd,  $J_{C-F}$  = 21.7, 17.3 Hz), 38.3 (d,  $J_{C-F}$  = 2.4 Hz) ppm.

**HRMS (m/z):** calcd for C<sub>16</sub>H<sub>13</sub>F<sub>2</sub>O [M+H]<sup>+</sup> 259.0929, found: 259.0934.

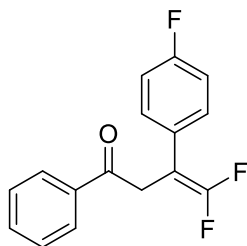

#### **4,4-Difluoro-3-(4-fluorophenyl)-1-phenylbut-3-en-1-one (3b):**

Yield = 82% (67.8 mg). Yellow oil.

Purified by flash silica gel column chromatography through silica gel (petroleum ether/ethyl acetate, 100/1).

**<sup>1</sup>H NMR (400 MHz, CDCl<sub>3</sub>):**  $\delta$  = 8.01-7.94 (m, 2H), 7.64-7.55 (m, 1H), 7.53-7.44 (m, 2H), 7.33-7.27 (m, 2H), 7.08-6.96 (m, 2H), 4.05 (t,  $J$  = 2.2 Hz, 2H) ppm.

**<sup>19</sup>F NMR (376 MHz, CDCl<sub>3</sub>):**  $\delta$  = -88.25 (d,  $J$  = 37.2 Hz, 1F), -89.16 (d,  $J$  = 37.2 Hz, 1F), -114.15 (td,  $J$  = 8.9, 4.0 Hz, 1F) ppm.

**<sup>13</sup>C NMR (100 MHz, CDCl<sub>3</sub>):**  $\delta$  = 195.3, 161.9 (d,  $J_{C-F}$  = 247.1 Hz), 154.6 (dd,  $J_{C-F}$  = 290.7, 289.0 Hz), 136.1, 133.5, 129.8 (dt,  $J_{C-F}$  = 7.3, 3.4 Hz), 129.3 (q,  $J_{C-F}$  = 3.8 Hz), 128.7, 128.1, 115.4 (d,  $J_{C-F}$  = 21.7 Hz), 86.4 (dd,  $J_{C-F}$  = 22.3, 17.7 Hz), 38.4 (d,  $J_{C-F}$  = 2.4 Hz) ppm.

**HRMS (m/z):** calcd for C<sub>16</sub>H<sub>12</sub>F<sub>3</sub>O [M+H]<sup>+</sup> 277.0835, found: 277.0836.

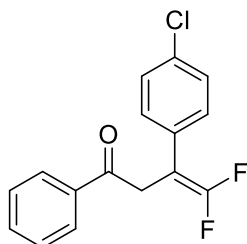

#### **3-(4-Chlorophenyl)-4,4-difluoro-1-phenylbut-3-en-1-one (3c):**

Yield = 69% (60.7 mg). Yellow oil.

Purified by flash silica gel column chromatography through silica gel (petroleum ether/ethyl acetate, 100/1).

**<sup>1</sup>H NMR (400 MHz, CDCl<sub>3</sub>):**  $\delta$  = 8.00-7.92 (m, 2H), 7.63-7.54 (m, 1H), 7.52-7.43 (m, 2H), 7.33-7.21 (m, 4H), 4.04 (t,  $J$  = 2.1 Hz, 2H) ppm.

**<sup>19</sup>F NMR (376 MHz, CDCl<sub>3</sub>):**  $\delta$  = -87.27 (d,  $J$  = 35.6 Hz, 1F), -88.17 (d,  $J$  = 35.4 Hz, 1F) ppm.

**<sup>13</sup>C NMR (100 MHz, CDCl<sub>3</sub>):**  $\delta$  = 195.1 (t,  $J_{\text{C-F}}$  = 2.8 Hz), 154.6 (dd,  $J_{\text{C-F}}$  = 292.8, 289.0 Hz), 136.0, 133.6, 133.3, 131.9 (t,  $J_{\text{C-F}}$  = 4.2 Hz), 129.3 (t,  $J_{\text{C-F}}$  = 3.4 Hz), 128.7, 128.7, 128.1, 86.5 (dd,  $J_{\text{C-F}}$  = 22.6, 16.9 Hz), 38.1 (d,  $J_{\text{C-F}}$  = 1.9 Hz) ppm.

**HRMS (m/z):** calcd for C<sub>16</sub>H<sub>12</sub>ClF<sub>2</sub>O [M+H]<sup>+</sup> 293.0539, found: 293.0545.

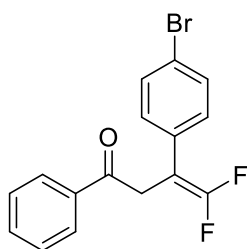

**3-(4-Bromophenyl)-4,4-difluoro-1-phenylbut-3-en-1-one (3d):**

Yield = 68% (68.7 mg). Yellow oil.

Purified by flash silica gel column chromatography through silica gel (petroleum ether/ethyl acetate, 100/1).

**<sup>1</sup>H NMR (400 MHz, CDCl<sub>3</sub>):**  $\delta$  = 8.01-7.94 (m, 2H), 7.65-7.56 (m, 1H), 7.53-7.41 (m, 4H), 7.24-7.16 (m, 2H), 4.06 (t,  $J$  = 2.1 Hz, 2H) ppm.

**<sup>19</sup>F NMR (376 MHz, CDCl<sub>3</sub>):**  $\delta$  = -87.09 (d,  $J$  = 34.5 Hz, 1F), -88.01 (d,  $J$  = 34.7 Hz, 1F) ppm.

**<sup>13</sup>C NMR (100 MHz, CDCl<sub>3</sub>):**  $\delta$  = 195.1 (t,  $J_{\text{C-F}}$  = 2.5 Hz), 154.6 (dd,  $J_{\text{C-F}}$  = 292.8, 289.1 Hz), 136.0, 133.6, 132.3 (t,  $J_{\text{C-F}}$  = 4.0 Hz), 131.6, 129.6 (t,  $J_{\text{C-F}}$  = 3.6 Hz), 128.7, 128.1, 121.4, 86.5 (dd,  $J_{\text{C-F}}$  = 22.6, 17.4 Hz), 38.0 (d,  $J_{\text{C-F}}$  = 2.4 Hz) ppm.

**HRMS (m/z):** calcd for C<sub>16</sub>H<sub>12</sub>BrF<sub>2</sub>O [M+H]<sup>+</sup> 337.0034, found: 337.0040.

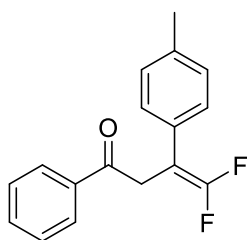

**4,4-Difluoro-1-phenyl-3-(p-tolyl)but-3-en-1-one (3e):**

Yield = 80% (65.0 mg). Yellow oil.

Purified by flash silica gel column chromatography through silica gel (petroleum ether/ethyl acetate, 100/1).

**<sup>1</sup>H NMR (400 MHz, CDCl<sub>3</sub>):**  $\delta$  = 8.04-7.96 (m, 2H), 7.64-7.56 (m, 1H), 7.53-7.45 (m, 2H), 7.26-7.21 (m, 2H), 7.19-7.12 (m, 2H), 4.07 (t,  $J$  = 2.2 Hz, 2H), 2.34 (s, 3H) ppm.

**<sup>19</sup>F NMR (376 MHz, CDCl<sub>3</sub>):**  $\delta$  = -88.08 (d,  $J$  = 40.1 Hz, 1F), -89.10 (d,  $J$  = 41.0 Hz, 1F) ppm.

**<sup>13</sup>C NMR (100 MHz, CDCl<sub>3</sub>):**  $\delta$  = 195.4 (t,  $J_{\text{C-F}}$  = 2.5 Hz), 154.6 (dd,  $J_{\text{C-F}}$  = 291.8, 287.5 Hz), 137.2, 136.2, 133.4, 130.3 (t,  $J_{\text{C-F}}$  = 4.5 Hz), 129.2, 128.7, 128.1, 127.8 (t,  $J_{\text{C-F}}$  = 3.4 Hz), 87.0 (dd,  $J_{\text{C-F}}$  = 21.4, 17.6 Hz), 38.3 (d,  $J_{\text{C-F}}$  = 2.9 Hz), 21.0 ppm.

**HRMS (m/z):** calcd for C<sub>17</sub>H<sub>15</sub>F<sub>2</sub>O [M+H]<sup>+</sup> 273.1085, found: 273.1085.

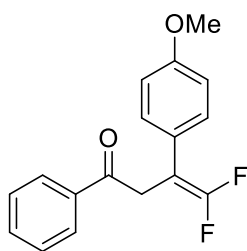

**4,4-Difluoro-3-(4-methoxyphenyl)-1-phenylbut-3-en-1-one (3f):**

Yield = 75% (65.2 mg). Yellow oil.

Purified by flash silica gel column chromatography through silica gel (petroleum ether/ethyl acetate, 100/1).

**<sup>1</sup>H NMR (400 MHz, CDCl<sub>3</sub>):**  $\delta$  = 7.99-7.92 (m, 2H), 7.61-7.53 (m, 1H), 7.49-7.42 (m, 2H), 7.27-7.20 (m, 2H), 6.89-6.81 (m, 2H), 4.02 (t,  $J$  = 2.2 Hz, 2H), 3.76 (s, 3H) ppm.

**<sup>19</sup>F NMR (376 MHz, CDCl<sub>3</sub>):**  $\delta$  = -89.16 (d,  $J$  = 39.9 Hz, 1F), -90.00 (d,  $J$  = 39.5 Hz, 1F) ppm.

**<sup>13</sup>C NMR (100 MHz, CDCl<sub>3</sub>):**  $\delta$  = 195.5 (t,  $J_{C-F}$  = 2.2 Hz), 158.7, 154.5 (dd,  $J_{C-F}$  = 291.2, 287.4 Hz), 136.3, 133.4, 129.1 (t,  $J_{C-F}$  = 3.5 Hz), 128.7, 128.1, 125.5 (t,  $J_{C-F}$  = 3.9 Hz), 113.9, 86.7 (dd,  $J_{C-F}$  = 21.9, 17.6 Hz), 55.1, 38.4 (d,  $J_{C-F}$  = 2.4 Hz) ppm.

**HRMS (m/z):** calcd for C<sub>17</sub>H<sub>15</sub>F<sub>2</sub>O<sub>2</sub> [M+H]<sup>+</sup> 289.1035, found: 289.1040.

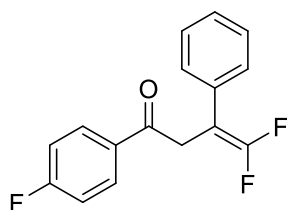

**4,4-Difluoro-1-(4-fluorophenyl)-3-phenylbut-3-en-1-one (3g):**

Yield = 78% (64.9 mg). Colorless oil.

Purified by flash silica gel column chromatography through silica gel (petroleum ether/ethyl acetate, 100/1).

**<sup>1</sup>H NMR (400 MHz, CDCl<sub>3</sub>):**  $\delta$  = 8.05-7.96 (m, 2H), 7.38-7.30 (m, 4H), 7.30-7.23 (m, 1H), 7.20-7.08 (m, 2H), 4.05 (t,  $J$  = 2.2 Hz, 2H) ppm.

**<sup>19</sup>F NMR (376 MHz, CDCl<sub>3</sub>):**  $\delta$  = -87.89 (d,  $J$  = 36.9 Hz, 1F), -88.92 (d,  $J$  = 36.2 Hz, 1F), -104.28 (ddd,  $J$  = 13.4, 9.0, 4.6 Hz, 1F) ppm.

**<sup>13</sup>C NMR (100 MHz, CDCl<sub>3</sub>):**  $\delta$  = 193.8 (t,  $J_{C-F}$  = 2.7 Hz), 165.9 (d,  $J_{C-F}$  = 255.3 Hz), 154.7 (dd,  $J_{C-F}$  = 292.3, 288.1 Hz), 133.3 (t,  $J_{C-F}$  = 3.3 Hz), 132.6 (d,  $J_{C-F}$  = 2.9 Hz), 130.8 (d,  $J_{C-F}$  = 9.6 Hz), 128.5, 127.9 (t,  $J_{C-F}$  = 3.4 Hz), 127.5, 115.8 (d,  $J_{C-F}$  = 22.2 Hz), 87.1 (dd,  $J_{C-F}$  = 21.7, 17.8 Hz), 38.2 (d,  $J_{C-F}$  = 2.9 Hz) ppm.

**HRMS (m/z):** calcd for C<sub>16</sub>H<sub>12</sub>F<sub>3</sub>O [M+H]<sup>+</sup> 277.0835, found: 277.0833.

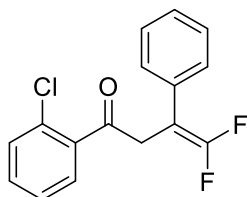

**1-(2-Chlorophenyl)-4,4-difluoro-3-phenylbut-3-en-1-one (3h):**

Yield = 91% (80.3 mg). Colorless oil.

Purified by flash silica gel column chromatography through silica gel (petroleum ether/ethyl acetate, 100/1).

**<sup>1</sup>H NMR (400 MHz, CDCl<sub>3</sub>):**  $\delta$  = 7.42-7.33 (m, 4H), 7.33-7.23 (m, 5H), 4.06 (t,  $J$  = 2.2 Hz, 2H) ppm.

**<sup>19</sup>F NMR (376 MHz, CDCl<sub>3</sub>):**  $\delta$  = -87.21 (d,  $J$  = 34.5 Hz, 1F), -88.81 (d,  $J$  = 34.4 Hz, 1F) ppm.

**<sup>13</sup>C NMR (100 MHz, CDCl<sub>3</sub>):**  $\delta$  = 198.8 (t,  $J_{\text{C-F}}$  = 2.6 Hz), 154.8 (dd,  $J_{\text{C-F}}$  = 293.1, 288.8 Hz), 138.6, 133.0 (t,  $J_{\text{C-F}}$  = 3.9 Hz), 131.9, 130.8, 130.4, 128.9, 128.5, 127.9 (t,  $J_{\text{C-F}}$  = 3.4 Hz), 127.5, 126.9, 86.9 (dd,  $J_{\text{C-F}}$  = 21.9, 17.6 Hz), 42.3 (d,  $J_{\text{C-F}}$  = 2.4 Hz) ppm.

**HRMS (m/z):** calcd for C<sub>16</sub>H<sub>12</sub>ClF<sub>2</sub>O [M+H]<sup>+</sup> 293.0539, found: 293.0534.

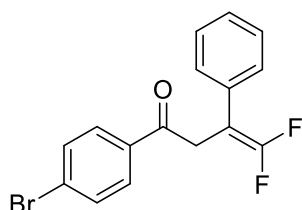

**1-(4-Bromophenyl)-4,4-difluoro-3-phenylbut-3-en-1-one (3i):**

Yield = 84% (85.2 mg). White solid. M.p. 39.7–40.5 °C.

Purified by flash silica gel column chromatography through silica gel (petroleum ether/ethyl acetate, 100/1).

**<sup>1</sup>H NMR (400 MHz, CDCl<sub>3</sub>):**  $\delta$  = 7.84-7.78 (m, 2H), 7.63-7.56 (m, 2H), 7.36-7.27 (m, 4H), 7.26-7.21 (m, 1H), 4.01 (t,  $J$  = 2.2 Hz, 2H) ppm.

**<sup>19</sup>F NMR (376 MHz, CDCl<sub>3</sub>):**  $\delta$  = -87.71 (d,  $J$  = 35.9 Hz, 1F), -88.74 (d,  $J$  = 36.0 Hz, 1F) ppm.

**<sup>13</sup>C NMR (100 MHz, CDCl<sub>3</sub>):**  $\delta$  = 194.4 (t,  $J_{\text{C-F}}$  = 2.7 Hz), 154.7 (dd,  $J_{\text{C-F}}$  = 292.6, 288.3 Hz), 134.9, 133.2 (t,  $J_{\text{C-F}}$  = 4.1 Hz), 132.0, 129.6, 128.6, 128.5, 127.9 (t,  $J_{\text{C-F}}$  = 3.4 Hz), 127.5, 87.0 (dd,  $J_{\text{C-F}}$  = 21.7, 17.8 Hz), 38.3 (d,  $J_{\text{C-F}}$  = 2.4 Hz) ppm.

**HRMS (m/z):** calcd for C<sub>16</sub>H<sub>12</sub>BrF<sub>2</sub>O [M+H]<sup>+</sup> 337.0034, found: 337.0036.

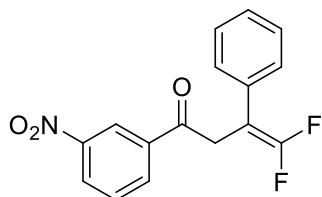

**4,4-Difluoro-1-(3-nitrophenyl)-3-phenylbut-3-en-1-one (3j):**

Yield = 51% (46.3 mg). Yellow solid. M.p. 40.8–41.3 °C.

Purified by flash silica gel column chromatography through silica gel (petroleum ether/ethyl acetate, 30/1).

**<sup>1</sup>H NMR (400 MHz, CDCl<sub>3</sub>):**  $\delta$  = 8.78 (t,  $J$  = 2.0 Hz, 1H), 8.47-8.41 (m, 1H), 8.31-8.26 (m, 1H), 7.69 (t,  $J$  = 8.0 Hz, 1H), 7.39-7.24 (m, 5H), 4.13 (t,  $J$  = 2.1 Hz, 2H) ppm.

**<sup>19</sup>F NMR (376 MHz, CDCl<sub>3</sub>):**  $\delta$  = -87.38 (d,  $J$  = 36.1 Hz, 1F), -88.35 (d,  $J$  = 36.0 Hz, 1F) ppm.

**<sup>13</sup>C NMR (100 MHz, CDCl<sub>3</sub>):**  $\delta$  = 193.3 (t,  $J_{\text{C-F}}$  = 2.9 Hz), 154.7 (dd,  $J$  = 293.1, 288.8 Hz), 148.4, 137.3, 133.6, 132.9 (t,  $J_{\text{C-F}}$  = 3.7 Hz), 130.0, 128.6, 127.9 (t,  $J_{\text{C-F}}$  = 3.4 Hz), 127.7, 127.7, 123.0, 86.6 (dd,  $J_{\text{C-F}}$  = 21.5, 18.1 Hz), 38.7 (d,  $J_{\text{C-F}}$  = 2.9 Hz) ppm.

**HRMS (m/z):** calcd for C<sub>16</sub>H<sub>12</sub>F<sub>2</sub>NO<sub>3</sub> [M+H]<sup>+</sup> 304.0780, found: 304.0785.

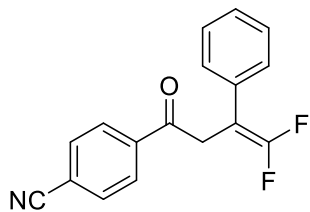

**4-(4,4-Difluoro-3-phenylbut-3-en-1-yl)benzonitrile (3k):**

Yield = 51% (43.2 mg). Yellow solid. M.p. 79.4–80.9 °C.

Purified by flash silica gel column chromatography through silica gel (petroleum ether/ethyl acetate, 30/1).

**<sup>1</sup>H NMR (400 MHz, CDCl<sub>3</sub>):**  $\delta$  = 8.07–8.01 (m, 2H), 7.81–7.72 (m, 2H), 7.38–7.24 (m, 5H), 4.07 (t,  $J$  = 2.2 Hz, 2H) ppm.

**<sup>19</sup>F NMR (376 MHz, CDCl<sub>3</sub>):**  $\delta$  = -87.39 (d,  $J$  = 35.5 Hz, 1F), -88.41 (d,  $J$  = 35.4 Hz, 1F) ppm.

**<sup>13</sup>C NMR (100 MHz, CDCl<sub>3</sub>):**  $\delta$  = 194.2 (t,  $J_{C-F}$  = 2.6 Hz), 154.7 (dd,  $J$  = 292.8, 288.5 Hz), 139.1, 132.8 (t,  $J_{C-F}$  = 3.9 Hz), 132.6, 128.6, 128.5, 127.9 (t,  $J_{C-F}$  = 3.4 Hz), 127.7, 117.8, 116.7, 86.7 (dd,  $J_{C-F}$  = 21.5, 18.0 Hz), 38.7 (d,  $J_{C-F}$  = 2.9 Hz) ppm.

**HRMS (m/z):** calcd for C<sub>17</sub>H<sub>12</sub>F<sub>2</sub>NO [M+H]<sup>+</sup> 284.0881, found: 284.0887.

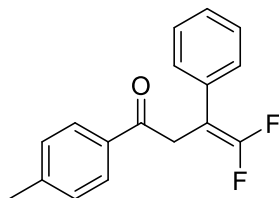

**4,4-Difluoro-3-phenyl-1-(p-tolyl)but-3-en-1-one (3l):**

Yield = 81% (66.1 mg). Yellow solid. M.p. 31.5–33.0 °C.

Purified by flash silica gel column chromatography through silica gel (petroleum ether/ethyl acetate, 100/1).

**<sup>1</sup>H NMR (400 MHz, CDCl<sub>3</sub>):**  $\delta$  = 7.93–7.87 (m, 2H), 7.36–7.32 (m, 4H), 7.31–7.24 (m, 3H), 4.06 (t,  $J$  = 2.2 Hz, 2H), 2.43 (s, 3H) ppm.

**<sup>19</sup>F NMR (376 MHz, CDCl<sub>3</sub>):**  $\delta$  = -88.06 (d,  $J$  = 37.1 Hz, 1F), -89.10 (d,  $J$  = 37.0 Hz, 1F) ppm.

**<sup>13</sup>C NMR (100 MHz, CDCl<sub>3</sub>):**  $\delta$  = 195.0 (t,  $J_{C-F}$  = 2.6 Hz), 154.7 (dd,  $J_{C-F}$  = 292.1, 287.8 Hz), 144.3, 133.8, 133.5 (t,  $J_{C-F}$  = 3.8 Hz), 129.3, 128.4, 128.2, 127.9 (t,  $J_{C-F}$  = 3.4 Hz), 127.4, 87.2 (dd,  $J_{C-F}$  = 21.9, 17.1 Hz), 38.1 (d,  $J_{C-F}$  = 2.4 Hz), 21.6 ppm.

**HRMS (m/z):** calcd for C<sub>17</sub>H<sub>15</sub>F<sub>2</sub>O [M+H]<sup>+</sup> 273.1085, found: 273.1090.

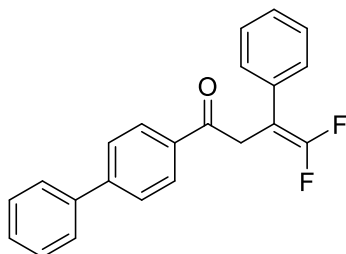

**1-([1,1'-Biphenyl]-4-yl)-4,4-difluoro-3-phenylbut-3-en-1-one (3m):**

Yield = 84% (84.5 mg). White solid. M.p. 115.3–116.2 °C.

Purified by flash silica gel column chromatography through silica gel (petroleum ether/ethyl acetate, 100/1).

**<sup>1</sup>H NMR (400 MHz, CDCl<sub>3</sub>):**  $\delta$  = 8.11-8.04 (m, 2H), 7.75-7.69 (m, 2H), 7.68-7.63 (m, 2H), 7.54-7.47 (m, 2H), 7.46-7.41 (m, 1H), 7.40-7.32 (m, 4H), 7.31-7.26 (m, 1H), 4.12 (t,  $J$  = 2.2 Hz, 2H) ppm.

**<sup>19</sup>F NMR (376 MHz, CDCl<sub>3</sub>):**  $\delta$  = -87.85 (d,  $J$  = 36.4 Hz, 1F), -88.89 (d,  $J$  = 36.7 Hz, 1F) ppm.

**<sup>13</sup>C NMR (100 MHz, CDCl<sub>3</sub>):**  $\delta$  = 194.9 (t,  $J_{C-F}$  = 2.6 Hz), 154.7 (dd,  $J_{C-F}$  = 292.4, 288.0 Hz), 146.1, 139.7, 134.9, 133.4, 129.0, 128.7, 128.5, 128.3, 128.0 (t,  $J_{C-F}$  = 3.4 Hz), 127.4, 127.3, 127.2, 87.2 (dd,  $J_{C-F}$  = 21.9, 17.6 Hz), 38.3 (d,  $J_{C-F}$  = 2.4 Hz) ppm.

**HRMS (m/z):** calcd for C<sub>22</sub>H<sub>17</sub>F<sub>2</sub>O [M+H]<sup>+</sup> 335.1242, found: 335.1248.

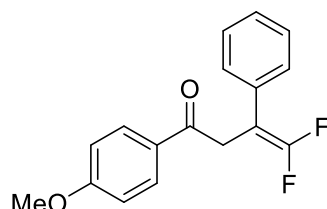

**4,4-Difluoro-1-(4-methoxyphenyl)-3-phenylbut-3-en-1-one (3n):**

Yield = 85% (73.1 mg). White solid. M.p. 56.6–57.4 °C.

Purified by flash silica gel column chromatography through silica gel (petroleum ether/ethyl acetate, 100/1).

**<sup>1</sup>H NMR (400 MHz, CDCl<sub>3</sub>):**  $\delta$  = 7.97-7.91 (m, 2H), 7.34-7.27 (m, 4H), 7.26-7.20 (m, 1H), 6.96-6.89 (m, 2H), 4.00 (t,  $J$  = 2.2 Hz, 2H), 3.84 (s, 3H) ppm.

**<sup>19</sup>F NMR (376 MHz, CDCl<sub>3</sub>):**  $\delta$  = -88.14 (d,  $J$  = 37.1 Hz, 1F), -89.15 (d,  $J$  = 37.1 Hz, 1F) ppm.

**<sup>13</sup>C NMR (100 MHz, CDCl<sub>3</sub>):**  $\delta$  = 193.8 (t,  $J_{C-F}$  = 2.8 Hz), 163.7, 154.7 (dd,  $J_{C-F}$  = 292.2, 287.8 Hz), 133.5 (t,  $J_{C-F}$  = 4.1 Hz), 130.4, 129.3, 128.4, 127.9 (t,  $J_{C-F}$  = 3.4 Hz), 127.3, 113.8, 89.4 (dd,  $J_{C-F}$  = 21.9, 17.1 Hz), 55.4, 37.9 (d,  $J_{C-F}$  = 2.5 Hz) ppm.

**HRMS (m/z):** calcd for C<sub>17</sub>H<sub>15</sub>F<sub>2</sub>O<sub>2</sub> [M+H]<sup>+</sup> 289.1035, found: 289.1032.

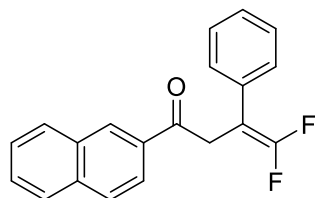

**4,4-Difluoro-1-(naphthalen-2-yl)-3-phenylbut-3-en-1-one (3o):**

Yield = 86% (79.7 mg). White solid. M.p. 87.4–89.0 °C.

Purified by flash silica gel column chromatography through silica gel (petroleum ether/ethyl acetate, 100/1).

**<sup>1</sup>H NMR (400 MHz, CDCl<sub>3</sub>):**  $\delta$  = 8.51 (s, 1H), 8.05 (dd,  $J$  = 8.6, 1.8 Hz, 1H), 7.96 (d,  $J$  = 6.8 Hz, 1H), 7.93-7.86 (m, 2H), 7.67-7.54 (m, 2H), 7.45-7.33 (m, 4H), 7.32-7.24 (m, 1H), 4.22 (t,  $J$  = 2.2 Hz, 2H) ppm.

**<sup>19</sup>F NMR (376 MHz, CDCl<sub>3</sub>):**  $\delta$  = -87.80 (d,  $J$  = 36.7 Hz, 1F), -88.85 (d,  $J$  = 36.2 Hz, 1F) ppm.

**<sup>13</sup>C NMR (100 MHz, CDCl<sub>3</sub>):**  $\delta$  = 195.2 (t,  $J_{C-F}$  = 2.2 Hz), 154.7 (dd,  $J_{C-F}$  = 292.4, 288.0 Hz), 135.6, 133.5, 133.4 (d,  $J_{C-F}$  = 3.8 Hz), 132.4, 129.9, 129.5, 128.6, 128.5, 128.5, 127.9 (t,  $J_{C-F}$  = 3.6 Hz), 127.7, 127.4, 126.9, 123.7, 87.3 (dd,  $J_{C-F}$  = 21.7, 17.3 Hz), 38.3 (d,  $J_{C-F}$  = 2.9 Hz) ppm.

**HRMS (m/z):** calcd for C<sub>20</sub>H<sub>15</sub>F<sub>2</sub>O [M+H]<sup>+</sup> 309.1085, found: 309.1091.

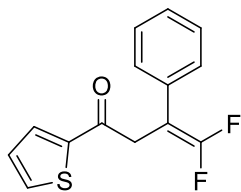

**4,4-Difluoro-3-phenyl-1-(thiophen-2-yl)but-3-en-1-one (3p):**

Yield = 88% (69.8 mg). Yellow oil.

Purified by flash silica gel column chromatography through silica gel (petroleum ether/ethyl acetate, 100/1).

**<sup>1</sup>H NMR (400 MHz, CDCl<sub>3</sub>):**  $\delta$  = 7.77 (dd,  $J$  = 3.8, 1.1 Hz, 1H), 7.66 (dd,  $J$  = 4.9, 1.1 Hz, 1H), 7.39–7.31 (m, 4H), 7.30–7.24 (m, 1H), 7.14 (dd,  $J$  = 5.0, 3.8 Hz, 1H), 4.01 (t,  $J$  = 2.2 Hz, 2H) ppm.

**<sup>19</sup>F NMR (376 MHz, CDCl<sub>3</sub>):**  $\delta$  = -87.63 (d,  $J$  = 35.7 Hz, 1F), -88.71 (d,  $J$  = 35.7 Hz, 1F) ppm.

**<sup>13</sup>C NMR (100 MHz, CDCl<sub>3</sub>):**  $\delta$  = 188.2 (t,  $J_{C-F}$  = 3.1 Hz), 154.8 (dd,  $J_{C-F}$  = 292.5, 288.8 Hz), 143.1, 134.1, 133.2 (t,  $J_{C-F}$  = 4.1 Hz), 132.1, 128.5, 128.2, 128.0 (t,  $J_{C-F}$  = 3.6 Hz), 127.5, 87.1 (dd,  $J_{C-F}$  = 21.7, 17.8 Hz), 38.8 (d,  $J_{C-F}$  = 2.4 Hz) ppm.

**HRMS (m/z):** calcd for C<sub>14</sub>H<sub>11</sub>F<sub>2</sub>OS [M+H]<sup>+</sup> 265.0493, found: 265.0499.

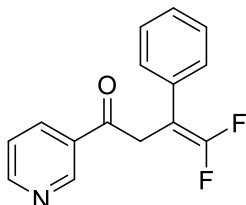

**4,4-Difluoro-3-phenyl-1-(pyridin-3-yl)but-3-en-1-one (3q):**

Yield = 68% (52.8 mg). White solid. M.p. 57.7–58.6 °C.

Purified by flash silica gel column chromatography through silica gel (petroleum ether/ethyl acetate, 2/1).

**<sup>1</sup>H NMR (400 MHz, CDCl<sub>3</sub>):**  $\delta$  = 9.18 (s, 1H), 8.79 (d,  $J$  = 3.6 Hz, 1H), 8.21 (dt,  $J$  = 8.0, 2.1 Hz, 1H), 7.42 (dd,  $J$  = 8.0, 4.8 Hz, 1H), 7.36–7.28 (m, 4H), 7.28–7.22 (m, 1H), 4.07 (t,  $J$  = 2.1 Hz, 2H) ppm.

**<sup>19</sup>F NMR (376 MHz, CDCl<sub>3</sub>):**  $\delta$  = -87.50 (d,  $J$  = 35.8 Hz, 1F), -88.55 (d,  $J$  = 35.8 Hz, 1F) ppm.

**<sup>13</sup>C NMR (100 MHz, CDCl<sub>3</sub>):**  $\delta$  = 194.3 (t,  $J_{C-F}$  = 2.5 Hz), 154.6 (dd,  $J_{C-F}$  = 292.7, 286.7 Hz), 153.8, 149.5, 135.4, 132.9 (t,  $J_{C-F}$  = 3.9 Hz), 131.4, 128.5, 127.9 (t,  $J_{C-F}$  = 3.4 Hz), 127.6, 123.7, 86.6 (dd,  $J_{C-F}$  = 21.7, 18.3 Hz), 38.6 (d,  $J_{C-F}$  = 2.4 Hz) ppm.

**HRMS (m/z):** calcd for C<sub>15</sub>H<sub>12</sub>F<sub>2</sub>NO [M+H]<sup>+</sup> 260.0881, found: 260.0882.

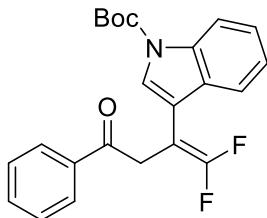

**tert-Butyl 3-(1,1-difluoro-4-oxo-4-phenylbut-1-en-2-yl)-1H-indole-1-carboxylate (3r):**

Yield = 62% (73.6 mg). Pink oil.

Purified by flash silica gel column chromatography through silica gel (petroleum ether/ethyl acetate, 100/1).

**<sup>1</sup>H NMR (400 MHz, CDCl<sub>3</sub>):**  $\delta$  = 8.15 (d,  $J$  = 7.1 Hz, 1H), 8.00-7.93 (m, 2H), 7.63-7.52 (m, 3H), 7.50-7.42 (m, 2H), 7.37-7.30 (m, 1H), 7.29-7.24 (m, 1H), 4.09 (t,  $J$  = 2.1 Hz, 2H), 1.66 (s, 9H) ppm.

**<sup>19</sup>F NMR (376 MHz, CDCl<sub>3</sub>):**  $\delta$  = -85.15 (d,  $J$  = 35.8 Hz, 1F), -88.24 (d,  $J$  = 35.8 Hz, 1F) ppm.

**<sup>13</sup>C NMR (100 MHz, CDCl<sub>3</sub>):**  $\delta$  = 195.3 (t,  $J_{C-F}$  = 2.9 Hz), 154.6 (dd,  $J_{C-F}$  = 289.3, 287.6 Hz), 149.4, 136.2, 135.1, 133.4, 128.8, 128.7, 128.1, 124.9 (d,  $J_{C-F}$  = 2.9 Hz), 124.6, 122.8, 119.8 (d,  $J_{C-F}$  = 3.4 Hz), 115.3, 113.5 (d,  $J_{C-F}$  = 5.2 Hz), 84.0, 79.6 (dd,  $J_{C-F}$  = 25.5, 20.7 Hz), 38.7 (d,  $J_{C-F}$  = 2.4 Hz), 28.1 ppm.

**HRMS (m/z):** calcd for C<sub>23</sub>H<sub>22</sub>F<sub>2</sub>NO<sub>3</sub> [M+H]<sup>+</sup> 398.1562, found: 398.1560.

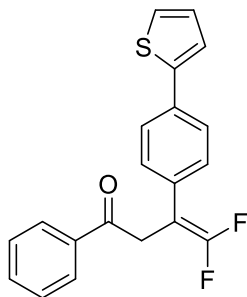

**4,4-Difluoro-1-phenyl-3-(4-(thiophen-2-yl)phenyl)but-3-en-1-one (3s):**

Yield = 70% (71.2 mg). White solid. M.p. 94.9–96.1 °C.

Purified by flash silica gel column chromatography through silica gel (petroleum ether/ethyl acetate, 100/1).

**<sup>1</sup>H NMR (400 MHz, CDCl<sub>3</sub>):**  $\delta$  = 8.04-7.98 (m, 2H), 7.64-7.55 (m, 3H), 7.53-7.46 (m, 2H), 7.39-7.33 (m, 2H), 7.32-7.29 (m, 1H), 7.29-7.26 (m, 1H), 7.08 (dd,  $J$  = 5.2, 3.6 Hz, 1H), 4.10 (t,  $J$  = 2.2 Hz, 2H) ppm.

**<sup>19</sup>F NMR (376 MHz, CDCl<sub>3</sub>):**  $\delta$  = -87.12 (d,  $J$  = 35.8 Hz, 1F), -88.01 (d,  $J$  = 35.8 Hz, 1F) ppm.

**<sup>13</sup>C NMR (100 MHz, CDCl<sub>3</sub>):**  $\delta$  = 195.5 (t,  $J_{C-F}$  = 2.5 Hz), 154.7 (dd,  $J_{C-F}$  = 292.9, 288.4 Hz), 143.6, 136.1, 133.5, 133.4, 132.4 (t,  $J_{C-F}$  = 4.2 Hz), 128.7, 128.3 (t,  $J_{C-F}$  = 3.9 Hz), 128.1, 128.0, 125.9, 124.9, 123.2, 86.9 (dd,  $J_{C-F}$  = 22.2, 16.9 Hz), 38.0 (d,  $J_{C-F}$  = 2.4 Hz) ppm.

**HRMS (m/z):** calcd for C<sub>20</sub>H<sub>15</sub>F<sub>2</sub>OS [M+H]<sup>+</sup> 341.0806, found: 341.0803.

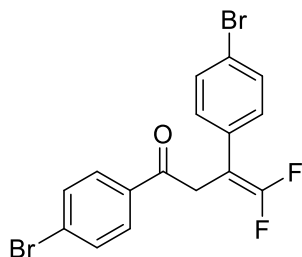

**1,3-Bis(4-bromophenyl)-4,4-difluorobut-3-en-1-one (3t):**

Yield = 67% (83.1 mg). Yellow solid. M.p. 53.8–54.8 °C.

Purified by flash silica gel column chromatography through silica gel (petroleum ether/ethyl acetate, 100/1).

**<sup>1</sup>H NMR (400 MHz, CDCl<sub>3</sub>):**  $\delta$  = 7.86-7.76 (m, 2H), 7.66-7.57 (m, 2H), 7.48-7.41 (m, 2H), 7.21-7.13 (m, 2H), 4.00 (t,  $J$  = 2.2 Hz, 2H) ppm.

**<sup>19</sup>F NMR (376 MHz, CDCl<sub>3</sub>):**  $\delta$  = -86.88 (d,  $J$  = 34.2 Hz, 1F), -87.78 (d,  $J$  = 34.3 Hz, 1F) ppm.

**<sup>13</sup>C NMR (100 MHz, CDCl<sub>3</sub>):**  $\delta$  = 194.1 (t,  $J_{C-F}$  = 2.6 Hz), 154.6 (dd,  $J_{C-F}$  = 293.1, 289.2 Hz), 134.7, 132.1 (t,  $J_{C-F}$  = 3.8 Hz), 132.1, 131.7, 129.6, 129.5, 128.8, 121.5, 86.3 (dd,  $J_{C-F}$  = 22.4, 17.1 Hz), 38.0 (d,  $J_{C-F}$  = 2.4 Hz) ppm.

**HRMS (m/z):** calcd for C<sub>16</sub>H<sub>11</sub>Br<sub>2</sub>F<sub>2</sub>O [M+H]<sup>+</sup> 414.9139, found: 414.9145.

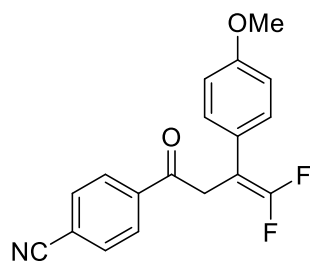

**4-(4,4-Difluoro-3-(4-methoxyphenyl)but-3-enyl)benzonitrile (3u):**

Yield = 56% (52.6 mg). Yellow oil.

Purified by flash silica gel column chromatography through silica gel (petroleum ether/ethyl acetate, 30/1).

**<sup>1</sup>H NMR (400 MHz, CDCl<sub>3</sub>):**  $\delta$  = 8.05-7.99 (m, 2H), 7.80-7.74 (m, 2H), 7.24-7.17 (m, 2H), 6.89-6.82 (m, 2H), 4.03 (t,  $J$  = 2.2 Hz, 2H), 3.78 (s, 3H) ppm.

**<sup>19</sup>F NMR (376 MHz, CDCl<sub>3</sub>):**  $\delta$  = -88.58 (d,  $J$  = 38.3 Hz, 1F), -89.40 (d,  $J$  = 38.2 Hz, 1F) ppm.

**<sup>13</sup>C NMR (100 MHz, CDCl<sub>3</sub>):**  $\delta$  = 194.4 (t,  $J_{C-F}$  = 2.7 Hz), 158.9, 154.5 (dd,  $J_{C-F}$  = 291.5, 287.9 Hz), 139.1, 132.6, 129.1 (t,  $J_{C-F}$  = 3.4 Hz), 128.5, 124.9 (t,  $J_{C-F}$  = 3.7 Hz), 117.8, 116.6, 114.0, 86.2 (dd,  $J_{C-F}$  = 21.6, 18.4 Hz), 55.2, 38.8 (d,  $J_{C-F}$  = 2.4 Hz) ppm.

**HRMS (m/z):** calcd for C<sub>18</sub>H<sub>14</sub>F<sub>2</sub>NO<sub>2</sub> [M+H]<sup>+</sup> 314.0987, found: 314.0981.

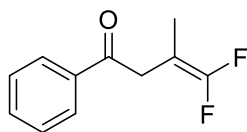

**4,4-Difluoro-3-methyl-1-phenylbut-3-en-1-one (3y):**

Yield = 25% (14.7 mg). Colorless oil.

Purified by flash silica gel column chromatography through silica gel (petroleum ether/ethyl acetate, 100/1).

**<sup>1</sup>H NMR (400 MHz, CDCl<sub>3</sub>):**  $\delta$  = 7.99-7.94 (m, 2H), 7.62-7.56 (m, 1H), 7.52-7.45 (m, 2H), 3.64 (t,  $J$  = 1.9 Hz, 2H), 1.65 (t,  $J$  = 3.2 Hz, 3H) ppm.

**<sup>19</sup>F NMR (376 MHz, CDCl<sub>3</sub>):**  $\delta$  = -94.06 (d,  $J$  = 55.2 Hz, 1F), -94.41 (d,  $J$  = 53.7 Hz, 1F) ppm.

**<sup>13</sup>C NMR (100 MHz, CDCl<sub>3</sub>):**  $\delta$  = 196.3 (t,  $J_{C-F}$  = 2.7 Hz), 153.7 (dd,  $J_{C-F}$  = 281.6, 280.2 Hz), 136.3, 133.4, 128.1, 128.1, 80.5 (dd,  $J_{C-F}$  = 22.9, 19.0 Hz), 38.3 (d,  $J_{C-F}$  = 2.9 Hz), 12.6 ppm.

**HRMS (m/z):** calcd for C<sub>11</sub>H<sub>11</sub>F<sub>2</sub>O [M+H]<sup>+</sup> 197.0772, found: 197.0778.

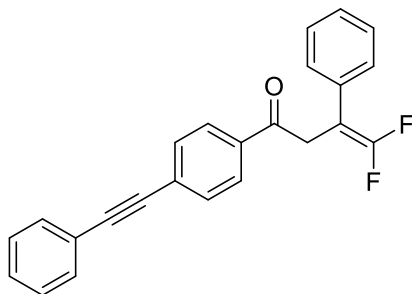

**4,4-Difluoro-3-phenyl-1-(4-(phenylethynyl)phenyl)but-3-en-1-one (3z):**

Yield = 67% (72.3 mg). White solid. M.p. 140.8–141.4 °C.

Purified by flash silica gel column chromatography through silica gel (petroleum ether/ethyl

acetate, 100/1).

**<sup>1</sup>H NMR (400 MHz, CDCl<sub>3</sub>):**  $\delta$  = 8.00-7.93 (m, 2H), 7.67-7.61 (m, 2H), 7.60-7.55 (m, 2H), 7.42-7.37 (m, 3H), 7.36-7.32 (m, 4H), 7.31-7.25 (m, 1H), 4.07 (t,  $J$  = 2.2 Hz, 2H) ppm.

**<sup>19</sup>F NMR (376 MHz, CDCl<sub>3</sub>):**  $\delta$  = -87.77 (d,  $J$  = 37.3 Hz, 1F), -88.81 (d,  $J$  = 35.8 Hz, 1F) ppm.

**<sup>13</sup>C NMR (100 MHz, CDCl<sub>3</sub>):**  $\delta$  = 194.6 (t,  $J_{C-F}$  = 2.6 Hz), 154.7 (dd,  $J$  = 292.4, 288.0 Hz), 135.2, 133.3 (t,  $J_{C-F}$  = 3.8 Hz), 131.8, 131.7, 128.9, 128.5, 128.5, 128.4, 128.1, 127.9 (t,  $J$  = 3.6 Hz), 127.5, 122.5, 93.0, 88.5, 87.0 (dd,  $J$  = 21.9, 17.6 Hz), 38.3 (d,  $J$  = 2.4 Hz) ppm.

**HRMS (m/z):** calcd for C<sub>24</sub>H<sub>17</sub>F<sub>2</sub>O [M+H]<sup>+</sup> 359.1242, found: 359.1245.

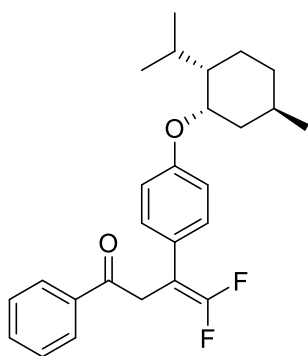

**4,4-Difluoro-3-(4-(((1S,2S,5R)-2-isopropyl-5-methylcyclohexyl)oxy)phenyl)-1-phenylbut-3-en-1-one (3a'):**

Yield = 61% (75.9 mg). Colorless oil.

Purified by flash silica gel column chromatography through silica gel (petroleum ether/ethyl acetate, 100/1).

**<sup>1</sup>H NMR (400 MHz, CDCl<sub>3</sub>):**  $\delta$  = 8.01-7.94 (m, 2H), 7.63-7.54 (m, 1H), 7.52-7.44 (m, 2H), 7.24-7.17 (m, 2H), 6.88-6.80 (m, 2H), 4.60 (d,  $J$  = 2.9 Hz, 1H), 4.03 (t,  $J$  = 2.2 Hz, 2H), 2.12-2.01 (m, 1H), 1.81-1.69 (m, 2H), 1.69-1.59 (m, 2H), 1.57-1.48 (m, 1H), 1.09-0.92 (m, 3H), 0.91 (d,  $J$  = 6.7 Hz, 3H), 0.84 (d,  $J$  = 6.7 Hz, 3H), 0.80 (d,  $J$  = 6.6 Hz, 3H) ppm.

**<sup>19</sup>F NMR (376 MHz, CDCl<sub>3</sub>):**  $\delta$  = -89.23 (d,  $J$  = 41.9 Hz, 1F), -90.05 (d,  $J$  = 42.3 Hz, 1F) ppm.

**<sup>13</sup>C NMR (100 MHz, CDCl<sub>3</sub>):**  $\delta$  = 195.6 (t,  $J_{C-F}$  = 2.5 Hz), 157.5, 154.5 (dd,  $J_{C-F}$  = 288.9, 285.1 Hz), 136.3, 133.4, 129.1 (t,  $J_{C-F}$  = 3.4 Hz), 128.7, 128.1, 124.8 (t,  $J_{C-F}$  = 3.9 Hz), 115.5, 86.7 (dd,  $J_{C-F}$  = 21.6, 17.5 Hz), 73.1, 47.7, 38.5 (d,  $J_{C-F}$  = 2.4 Hz), 37.5, 34.9, 29.2, 26.1, 24.8, 22.2, 21.0, 20.8 ppm.

**HRMS (m/z):** calcd for C<sub>26</sub>H<sub>31</sub>F<sub>2</sub>O<sub>2</sub> [M+H]<sup>+</sup> 413.2287, found: 413.2289.

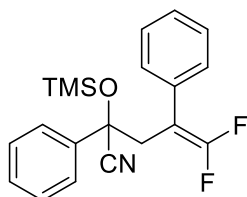

**(S)-5,5-Difluoro-2,4-diphenyl-2-((trimethylsilyl)oxy)pent-4-enenitrile (4):**

Yield = 68% (73.2 mg). Colorless oil.

Purified by flash silica gel column chromatography through silica gel (petroleum ether/ethyl acetate, 100/1).

**<sup>1</sup>H NMR (400 MHz, DMSO):**  $\delta$  = 7.49-7.36 (m, 5H), 7.35-7.30 (m, 4H), 7.29-7.24 (m, 1H), 3.22 (dt,  $J$  = 14.6, 2.3 Hz, 1H), 3.10 (dt,  $J$  = 14.7, 1.9 Hz, 1H), -0.11 (s, 9H) ppm.

**<sup>19</sup>F NMR (376 MHz, DMSO):**  $\delta$  = -87.94 (d,  $J$  = 34.2 Hz, 1F), -90.01 (d,  $J$  = 34.5 Hz, 1F) ppm.

**<sup>13</sup>C NMR (100 MHz, DMSO):**  $\delta$  = 154.6 (t,  $J_{C-F}$  = 287.9 Hz), 139.6, 132.8 (t,  $J_{C-F}$  = 3.5 Hz), 129.1,

128.7, 128.5 (t,  $J_{\text{C-F}} = 2.9$  Hz), 128.1, 127.4, 124.9, 119.9, 88.7 (dd,  $J_{\text{C-F}} = 19.1, 17.7$  Hz), 74.6 (t,  $J_{\text{C-F}} = 3.0$  Hz), 43.0, 0.4 ppm.

**HRMS (m/z):** calcd for  $\text{C}_{20}\text{H}_{22}\text{F}_2\text{NOSi}$   $[\text{M}+\text{H}]^+$  358.1433, found: 358.1430.

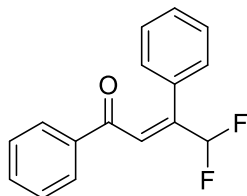

**(E)-4,4-difluoro-1,3-diphenylbut-2-en-1-one (5):**

Yield = 36% (27.8 mg). Colorless oil.

Purified by flash silica gel column chromatography through silica gel (petroleum ether/ethyl acetate, 100/1).

**$^1\text{H}$  NMR (400 MHz,  $\text{CDCl}_3$ ):**  $\delta$  = 7.88-7.81 (m, 2H), 7.55-7.48 (m, 1H), 7.42-7.35 (m, 2H), 7.28-7.26 (m, 5H), 7.05 (t,  $J = 2.1$  Hz, 1H), 6.42 (t,  $J = 13.8$  Hz, 1H) ppm.

**$^{19}\text{F}$  NMR (376 MHz,  $\text{CDCl}_3$ ):**  $\delta$  = -114.62 (s, 1F), -114.76 (s, 1F) ppm.

**$^{13}\text{C}$  NMR (100 MHz,  $\text{CDCl}_3$ ):**  $\delta$  = 192.9, 143.2 (t,  $J_{\text{C-F}} = 19.9$  Hz), 136.4, 133.6, 132.5, 129.1 (t,  $J_{\text{C-F}} = 8.6$  Hz), 129.1, 128.9, 128.7, 128.6, 128.4, 114.5 (t,  $J_{\text{C-F}} = 242.5$  Hz) ppm.

**HRMS (m/z):** calcd for  $\text{C}_{16}\text{H}_{13}\text{F}_2\text{O}$   $[\text{M}+\text{H}]^+$  259.0929, found: 259.0934.

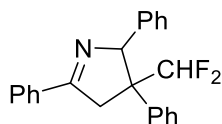

**3-(Difluoromethyl)-2,3,5-triphenyl-3,4-dihydro-2H-pyrrole (6):**

Yield = 79% (81.9 mg). White solid. M.p. 123.2–124.7 °C.

Purified by flash silica gel column chromatography through silica gel (petroleum ether/ethyl acetate, 50/1).

**$^1\text{H}$  NMR (400 MHz,  $\text{CDCl}_3$ ):**  $\delta$  = 8.10-8.02 (m, 2H), 7.58-7.48 (m, 3H), 7.14-7.05 (m, 6H), 7.02-6.91 (m, 4H), 6.26 (t,  $J = 56.2$  Hz, 1H), 5.83 (s, 1H), 3.79 (s, 2H) ppm.

**$^{19}\text{F}$  NMR (376 MHz,  $\text{CDCl}_3$ ):**  $\delta$  = -122.91 (d,  $J = 273.1$  Hz, 1F), -125.28 (d,  $J = 272.8$  Hz, 1F) ppm.

**$^{13}\text{C}$  NMR (100 MHz,  $\text{CDCl}_3$ ):**  $\delta$  = 171.4, 138.3, 136.6, 133.5, 131.2, 128.7, 128.4, 128.2, 127.9, 127.9, 127.7, 127.2, 126.8, 117.9 (t,  $J_{\text{C-F}} = 247.6$  Hz), 80.4 (t,  $J_{\text{C-F}} = 2.9$  Hz), 59.3 (t,  $J_{\text{C-F}} = 17.6$  Hz), 41.5 (t,  $J_{\text{C-F}} = 3.7$  Hz) ppm.

**HRMS (m/z):** calcd for  $\text{C}_{23}\text{H}_{20}\text{F}_2\text{N}$   $[\text{M}+\text{H}]^+$  348.1558, found: 348.1564.

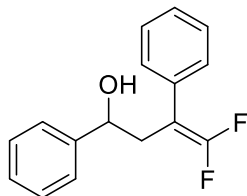

**4,4-Difluoro-1,3-diphenylbut-3-en-1-ol (7):**

Yield = 98% (76.4 mg). Colorless oil.

Purified by flash silica gel column chromatography through silica gel (petroleum ether/ethyl acetate, 100/1).

**$^1\text{H}$  NMR (400 MHz,  $\text{CDCl}_3$ ):**  $\delta$  = 7.44-7.38 (m, 2H), 7.38-7.27 (m, 8H), 4.62 (dd,  $J = 8.2, 5.7$  Hz, 1H), 2.96-2.87 (m, 1H), 2.82-2.73 (m, 1H), 2.13 (s, 1H) ppm.

**<sup>19</sup>F NMR (376 MHz, CDCl<sub>3</sub>):**  $\delta$  = -89.89 (s, 1F), -88.90 (s, 1F) ppm.

**<sup>13</sup>C NMR (100 MHz, CDCl<sub>3</sub>):**  $\delta$  = 154.4 (t,  $J_{\text{C-F}}$  = 287.5 Hz), 143.4, 133.2, 128.5, 128.4, 128.3 (t,  $J_{\text{C-F}}$  = 3.1 Hz), 127.8, 127.4, 125.8, 89.5 (dd,  $J_{\text{C-F}}$  = 19.0, 17.0 Hz), 72.2 (t,  $J_{\text{C-F}}$  = 2.9 Hz), 37.5 ppm.

**HRMS (m/z):** calcd for C<sub>16</sub>H<sub>15</sub>F<sub>2</sub>O [M+H]<sup>+</sup> 261.1085, found: 261.1091.

## **Reference**

- [1] Wu, X.; Xie, F.; Gridnev, I. D.; Zhang, W. A copper-catalyzed reductive defluorination of  $\beta$ -trifluoromethylated enones *via* oxidative homocoupling of Grignard reagents, *Org. Lett.* **2018**, *20*, 1638–1642.
- [2] Liu, N.; Mao, L.-L.; Yang, B.; Yang, S.-D. Copper-promoted oxidative-fluorination of arylphosphine under mild conditions, *Chem. Commun.* **2014**, *50*, 10879–10882.
- [3] Yao, C.; Wang, S.; Norton, J.; Hammond, M. Catalyzing the hydrodefluorination of CF<sub>3</sub>-substituted alkenes by PhSiH<sub>3</sub>. H• transfer from a nickel hydride. *J. Am. Chem. Soc.* **2020**, *142*, 4793–4799.

**$^1\text{H}$ ,  $^{19}\text{F}$ , and  $^{13}\text{C}$  NMR spectra of products**

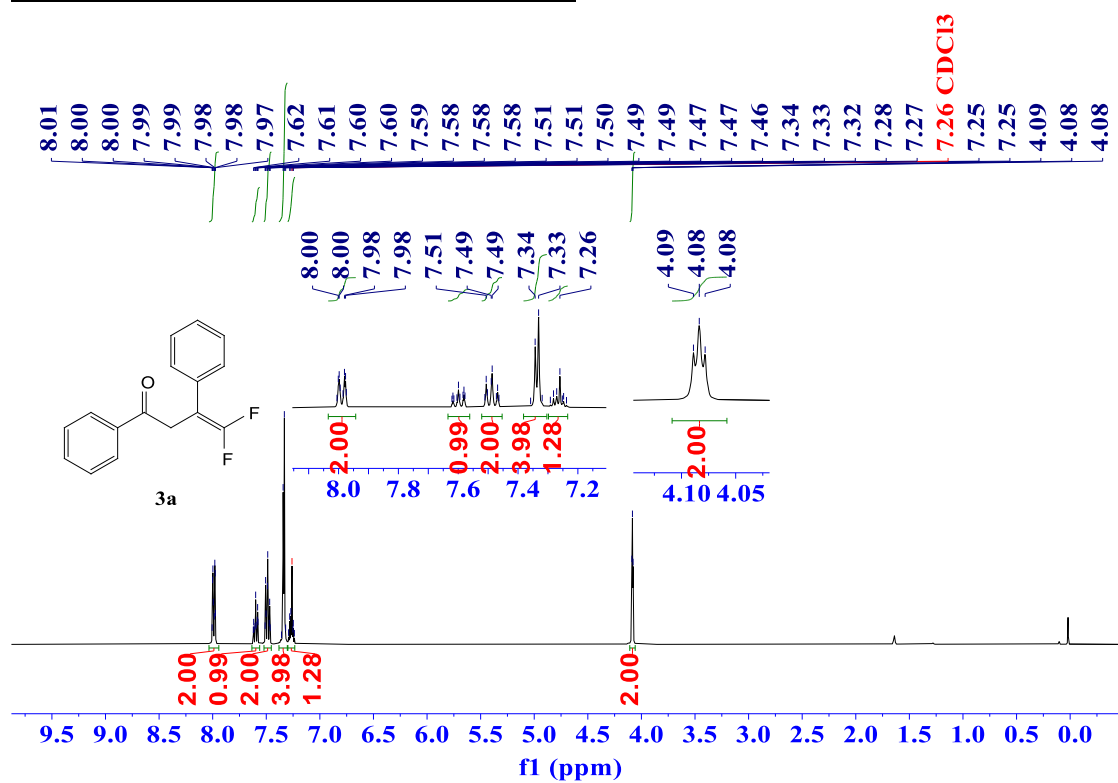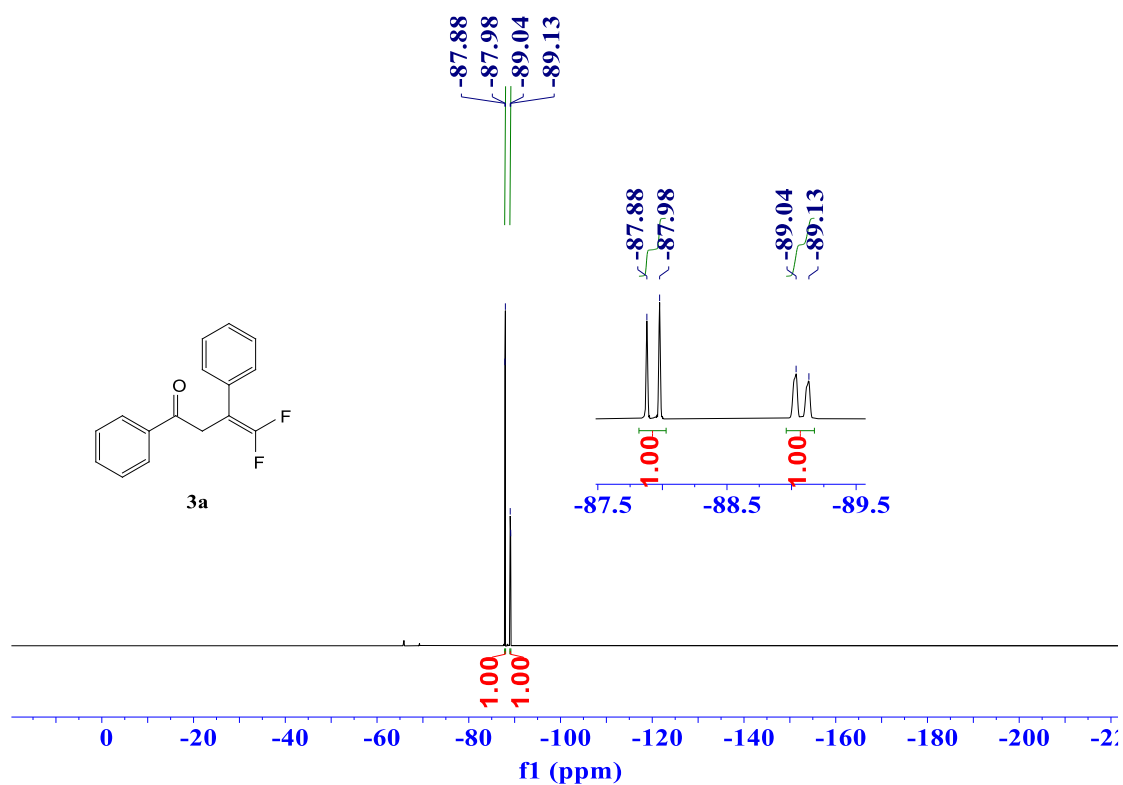

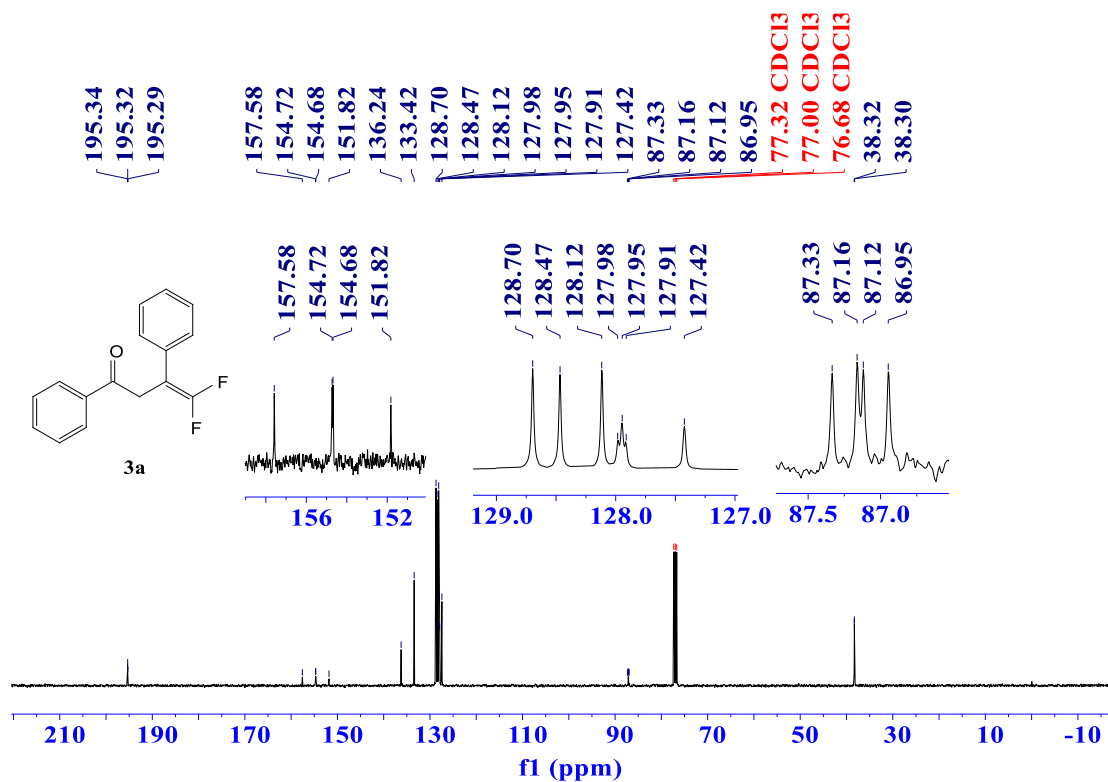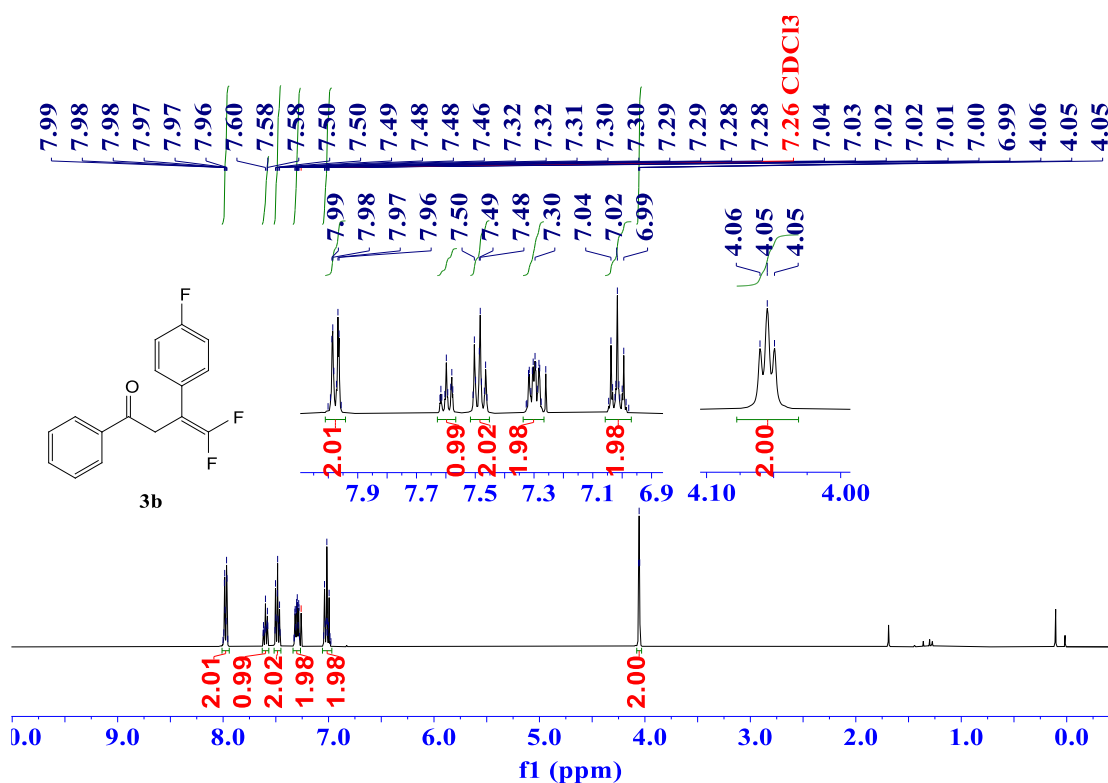

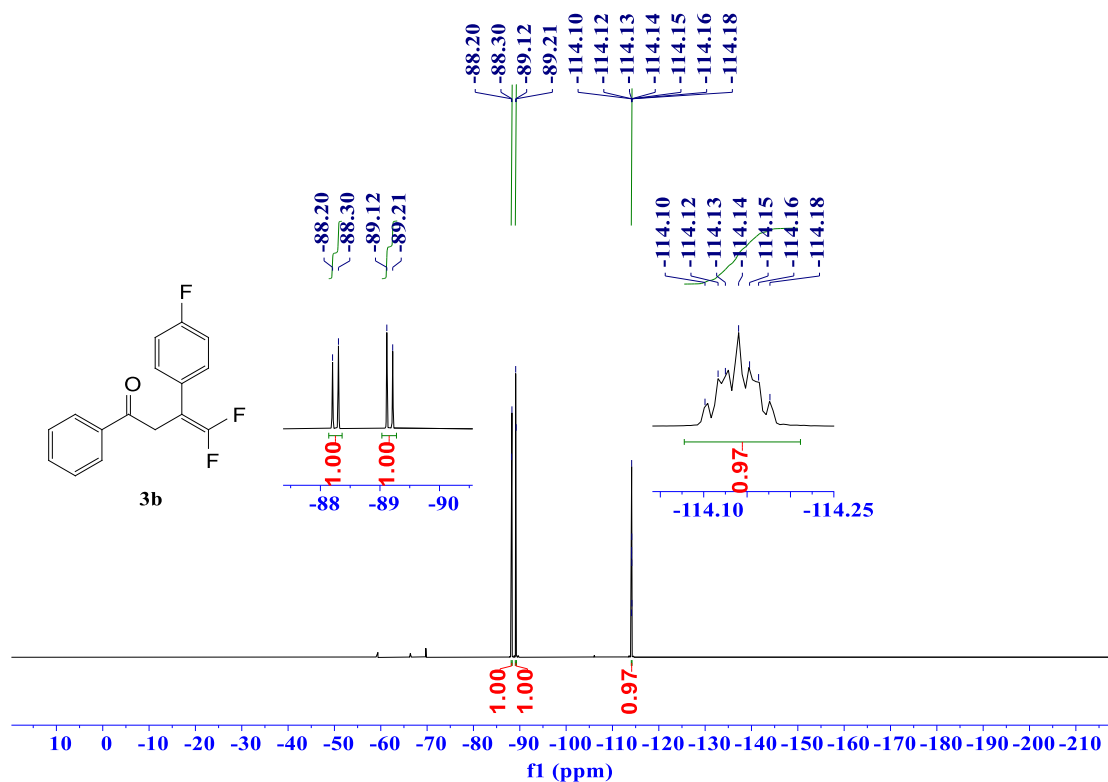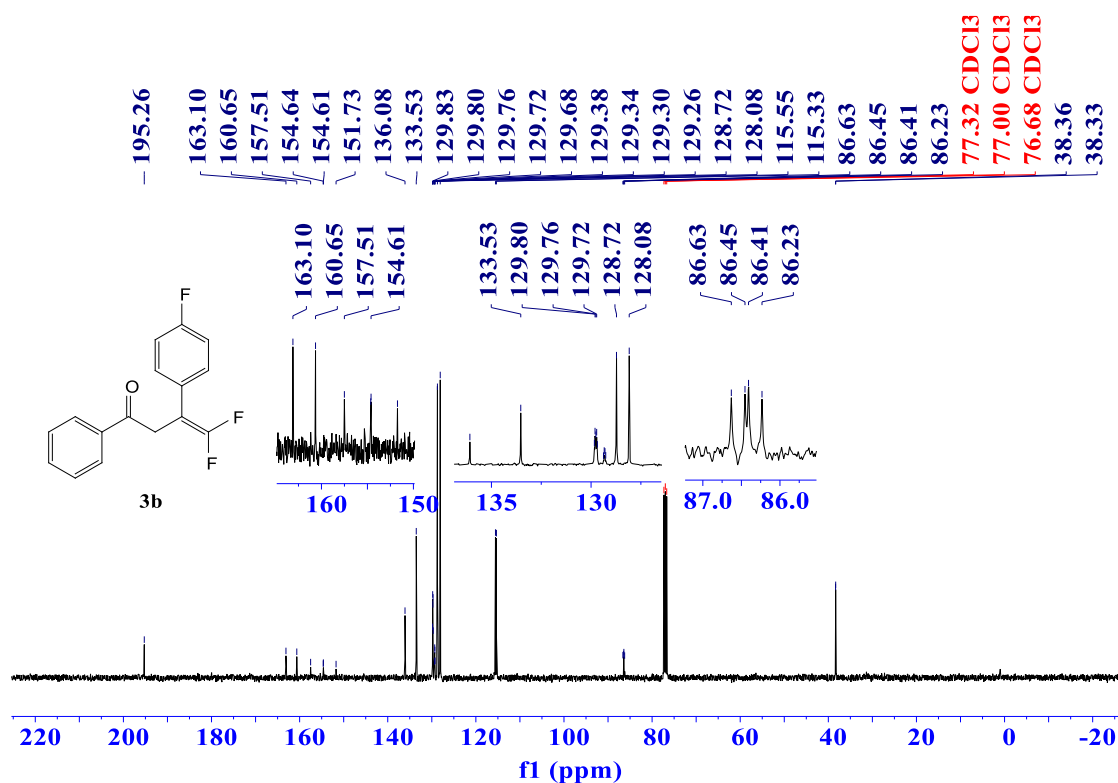

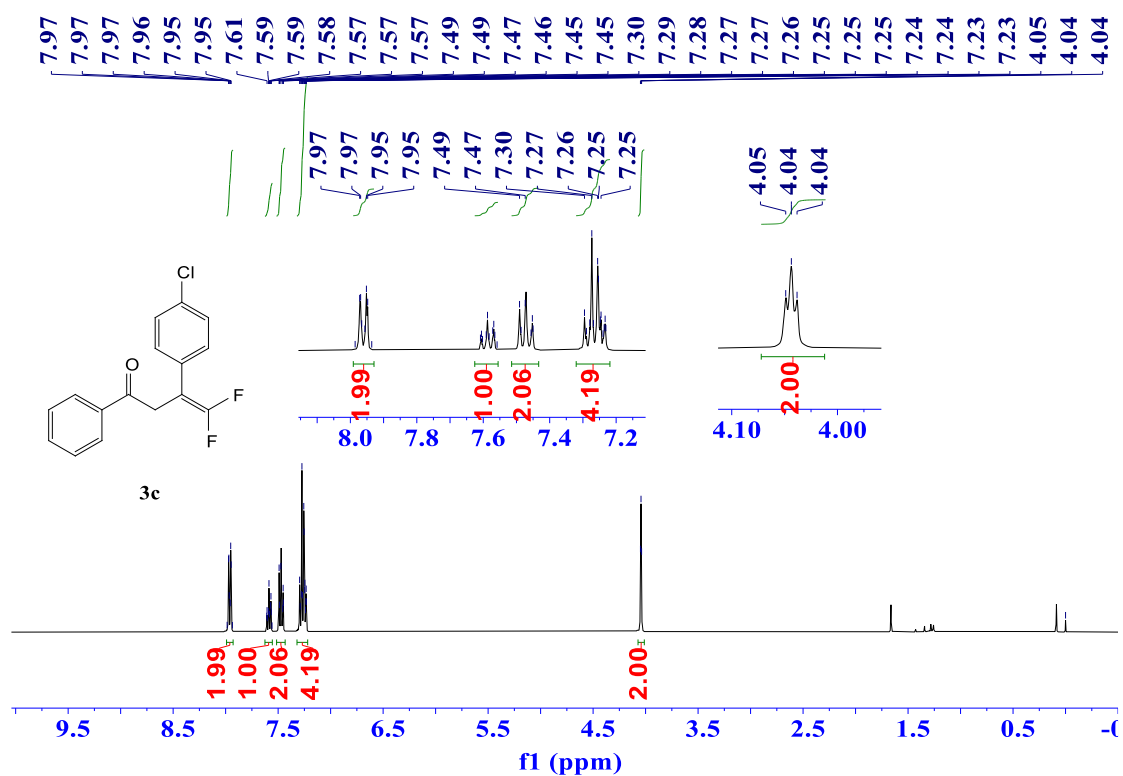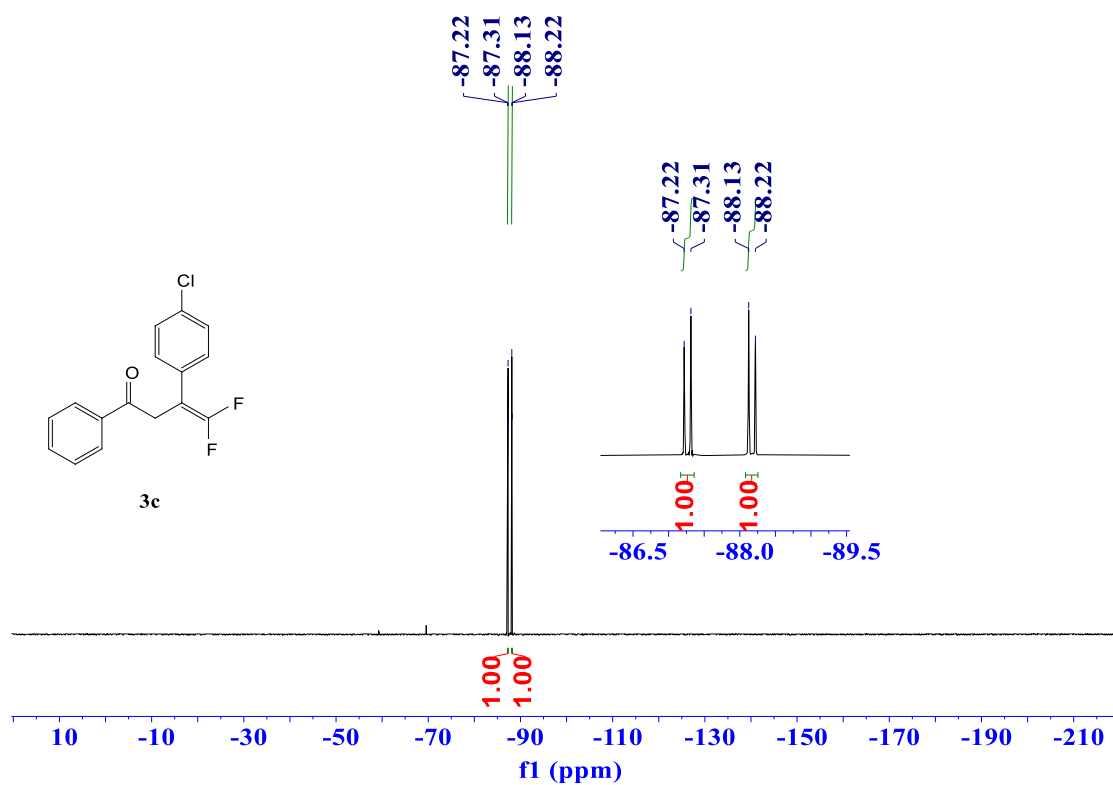

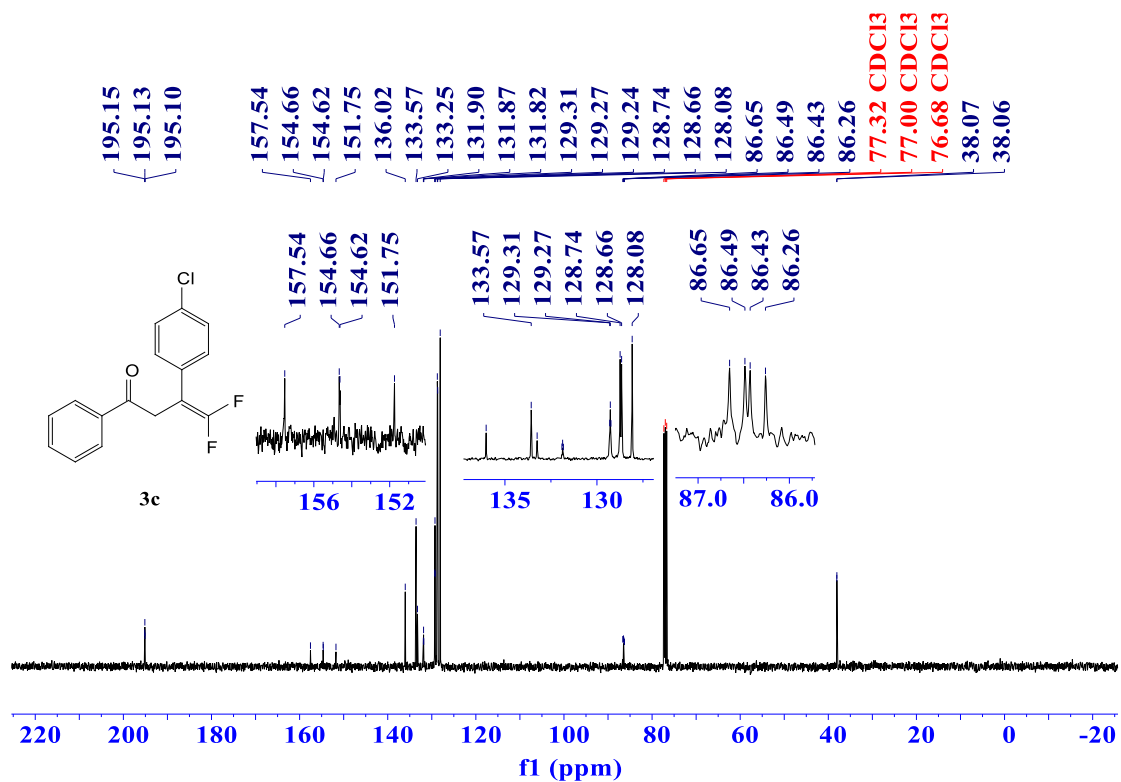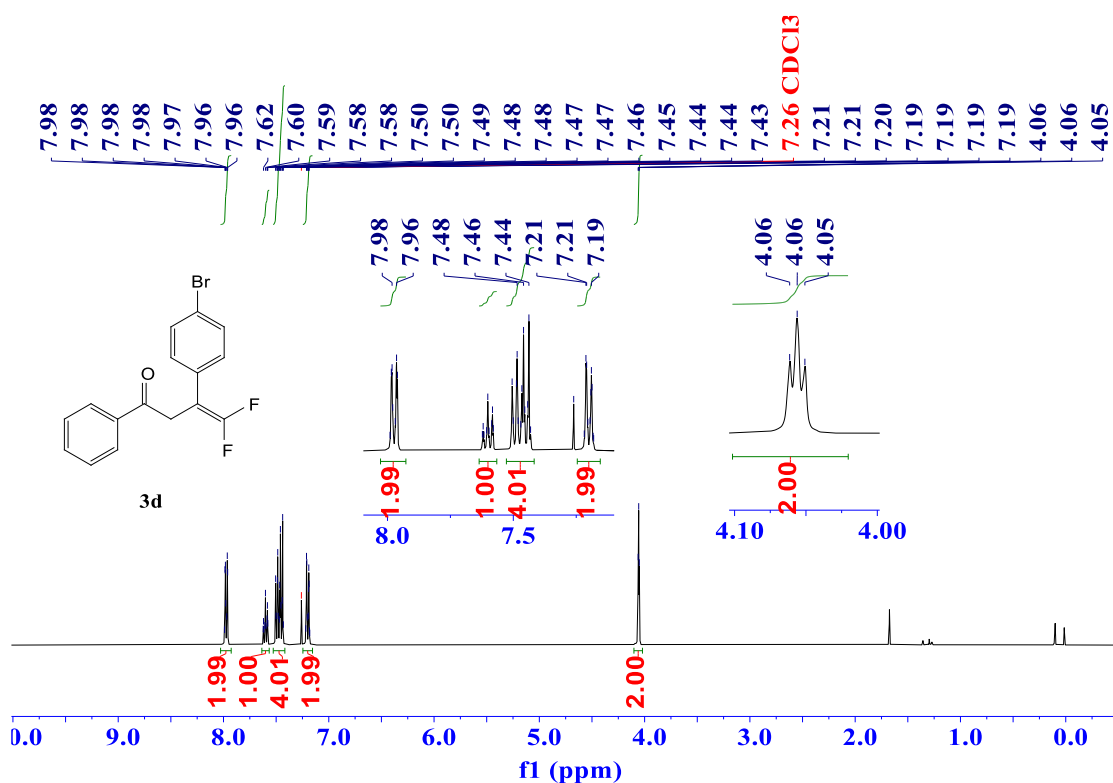

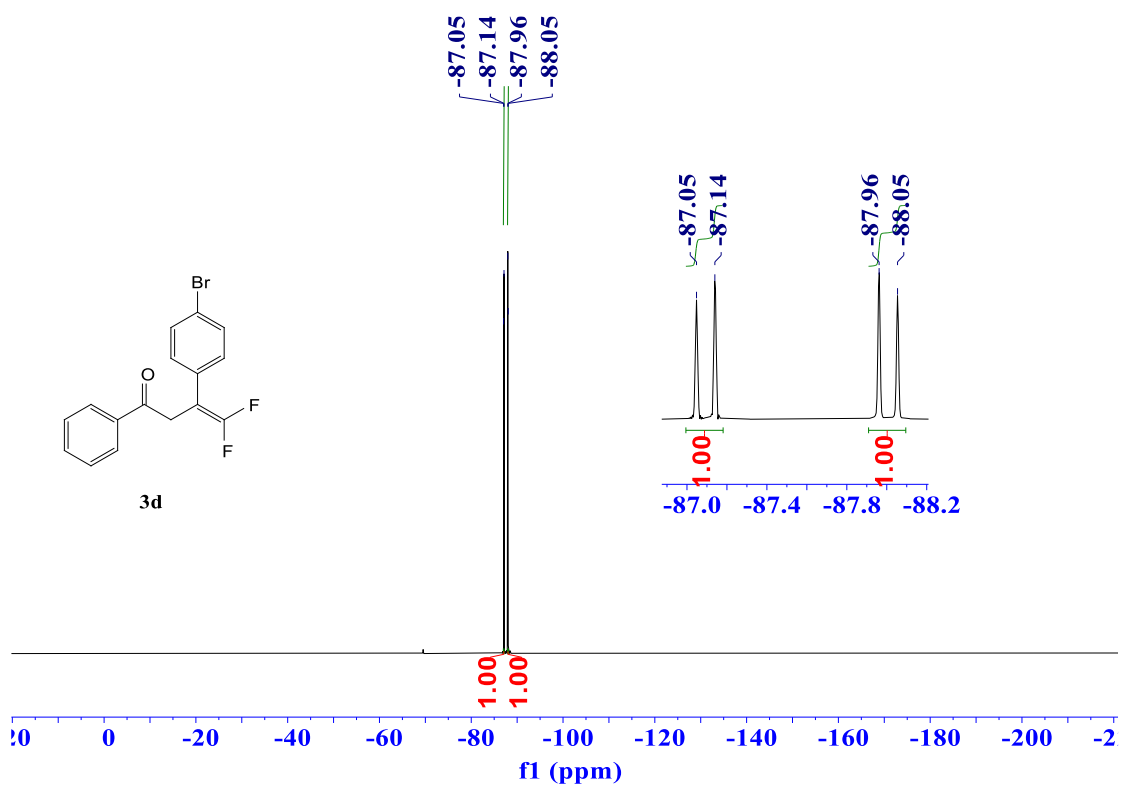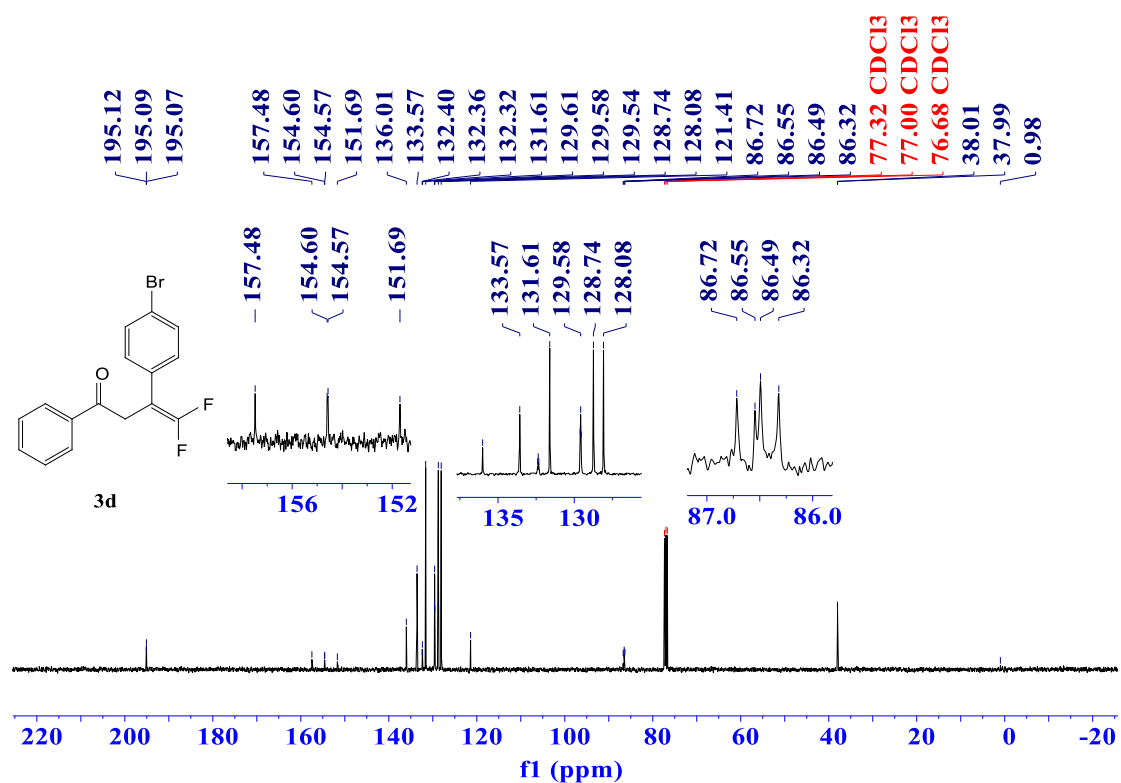

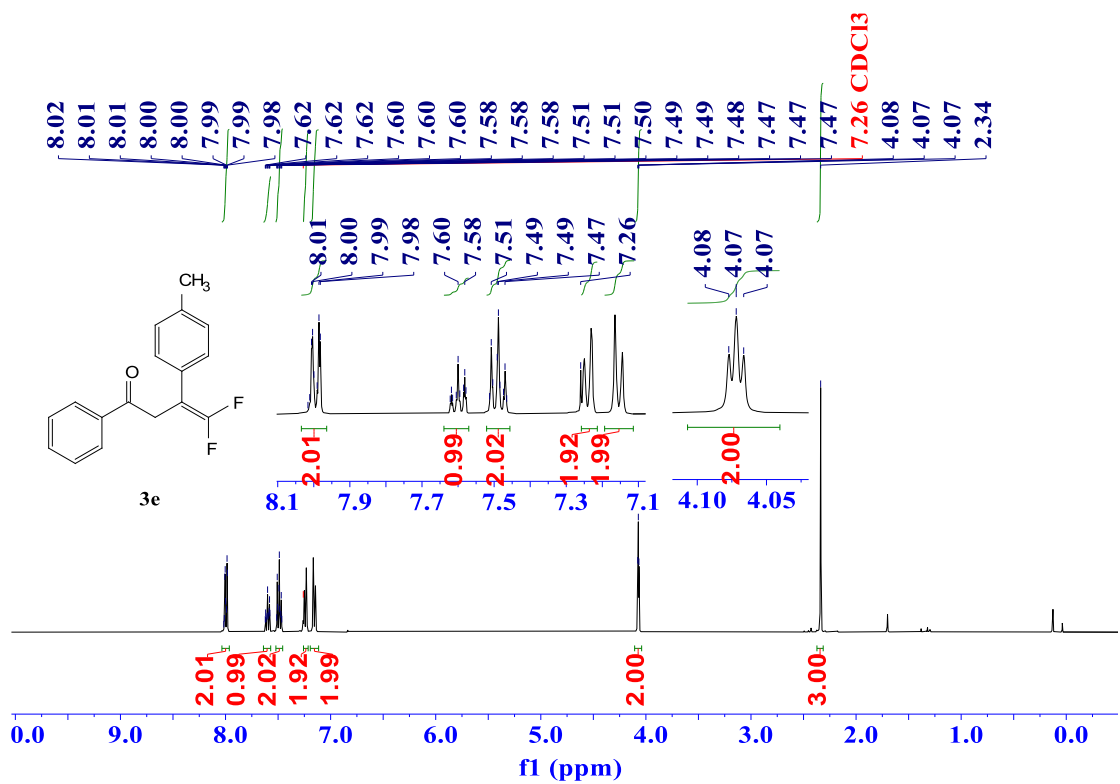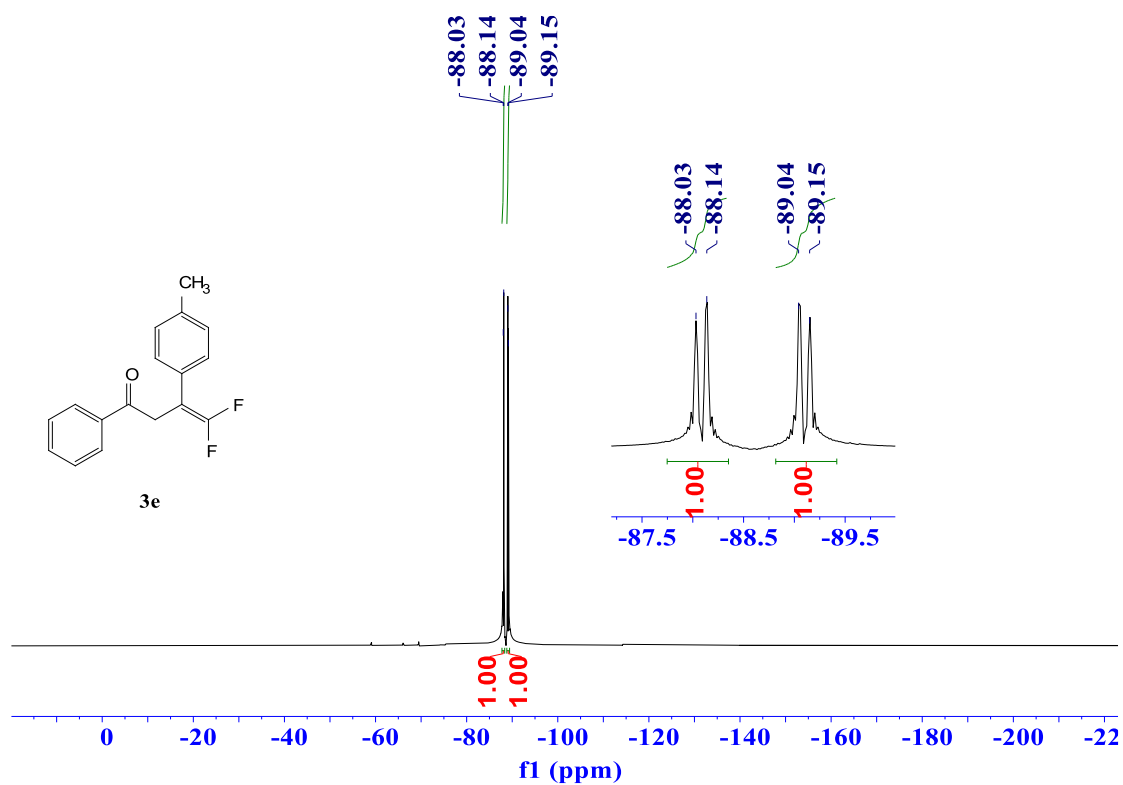

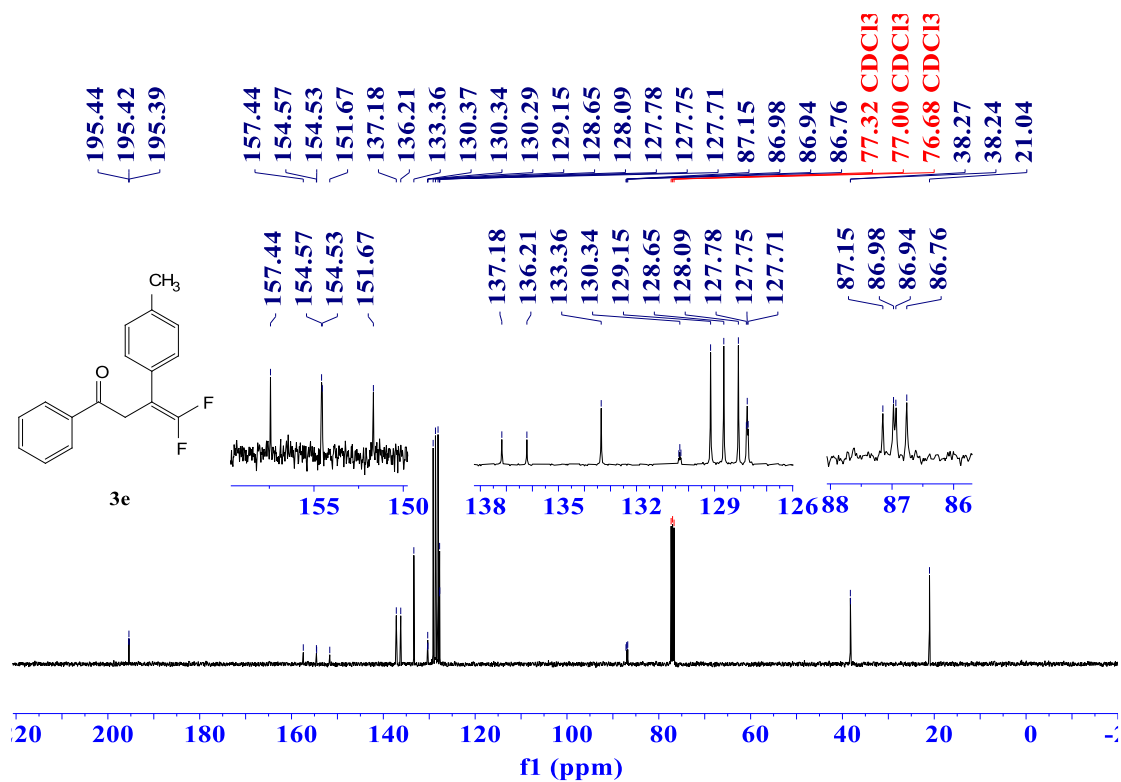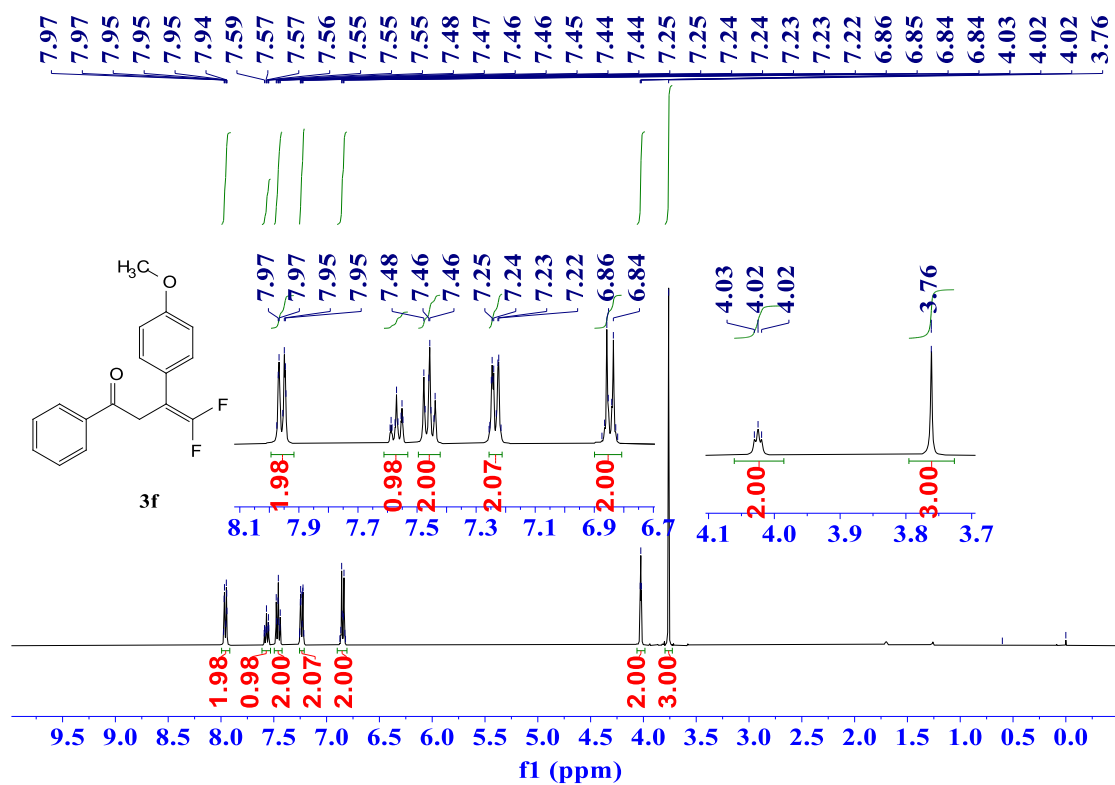

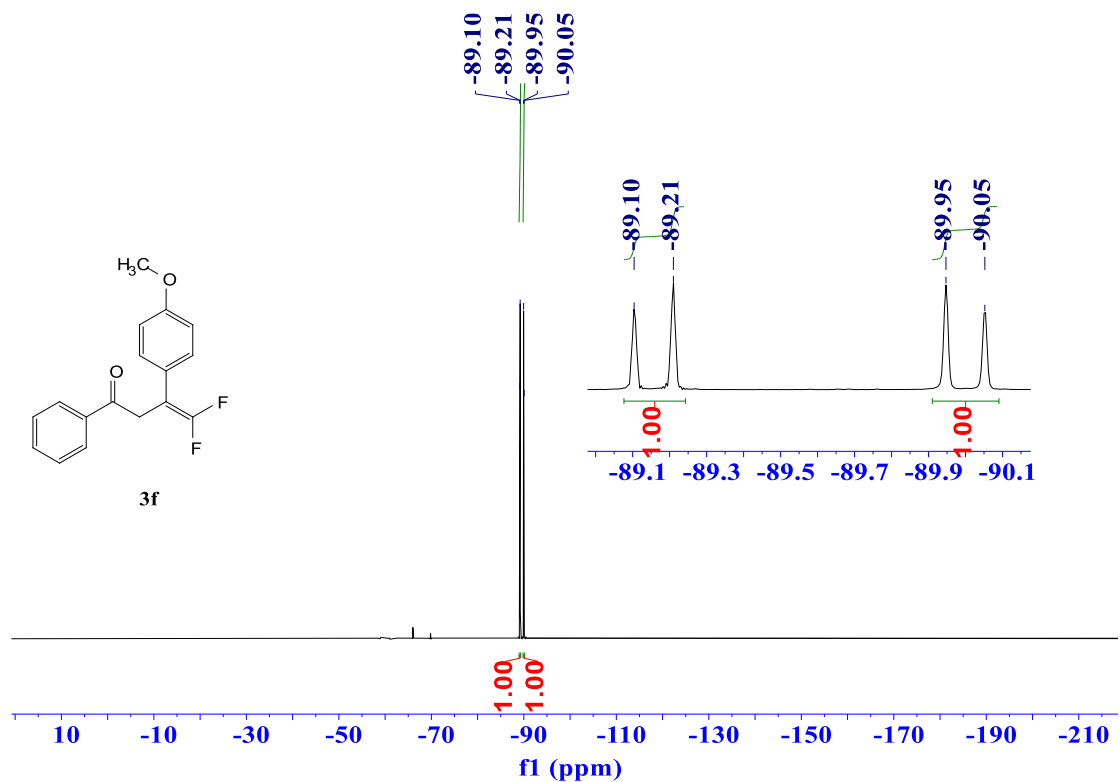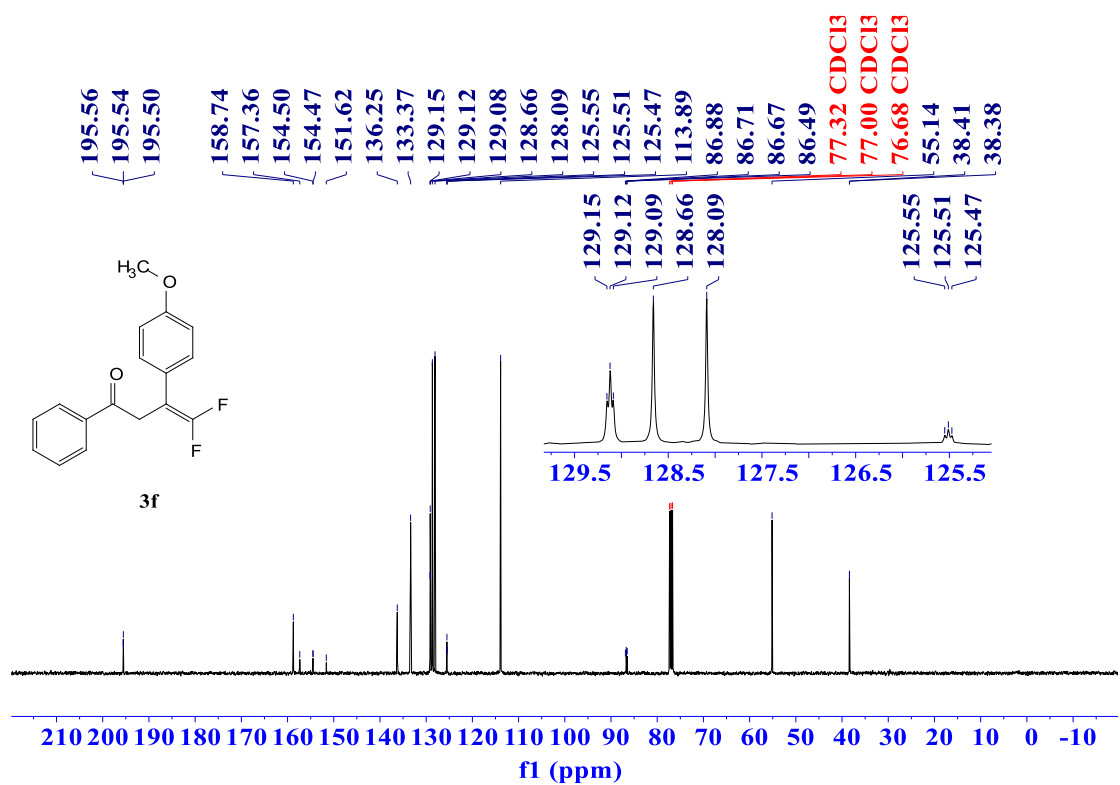

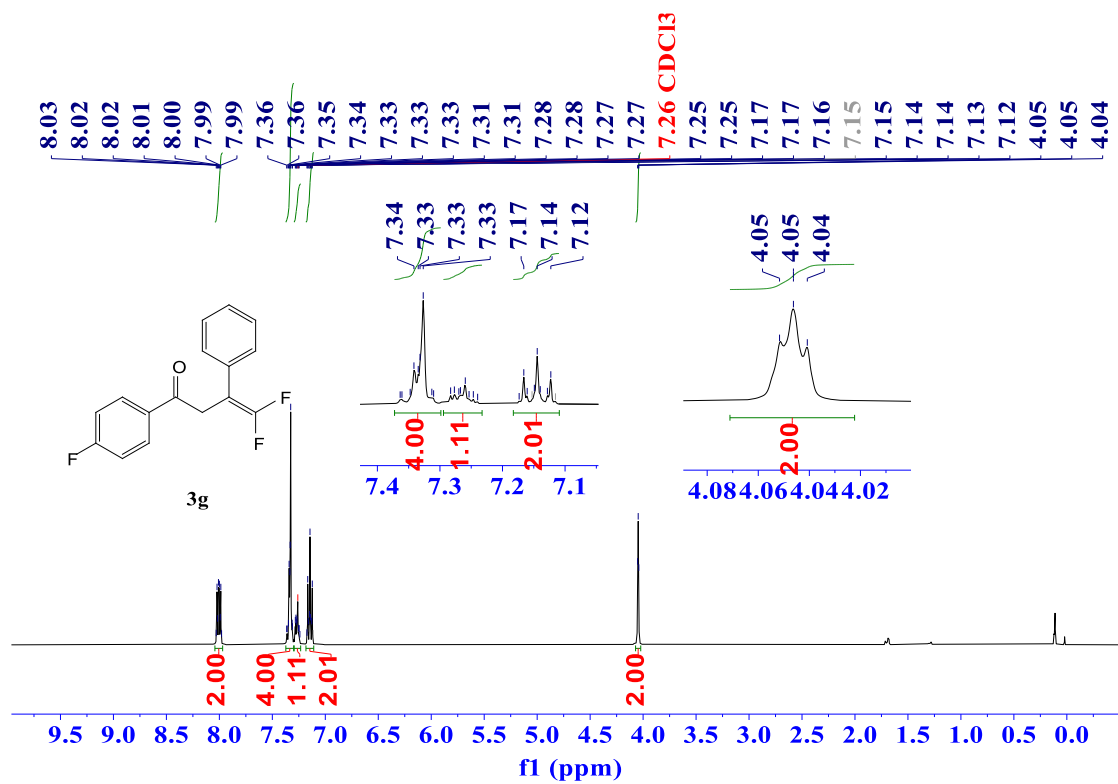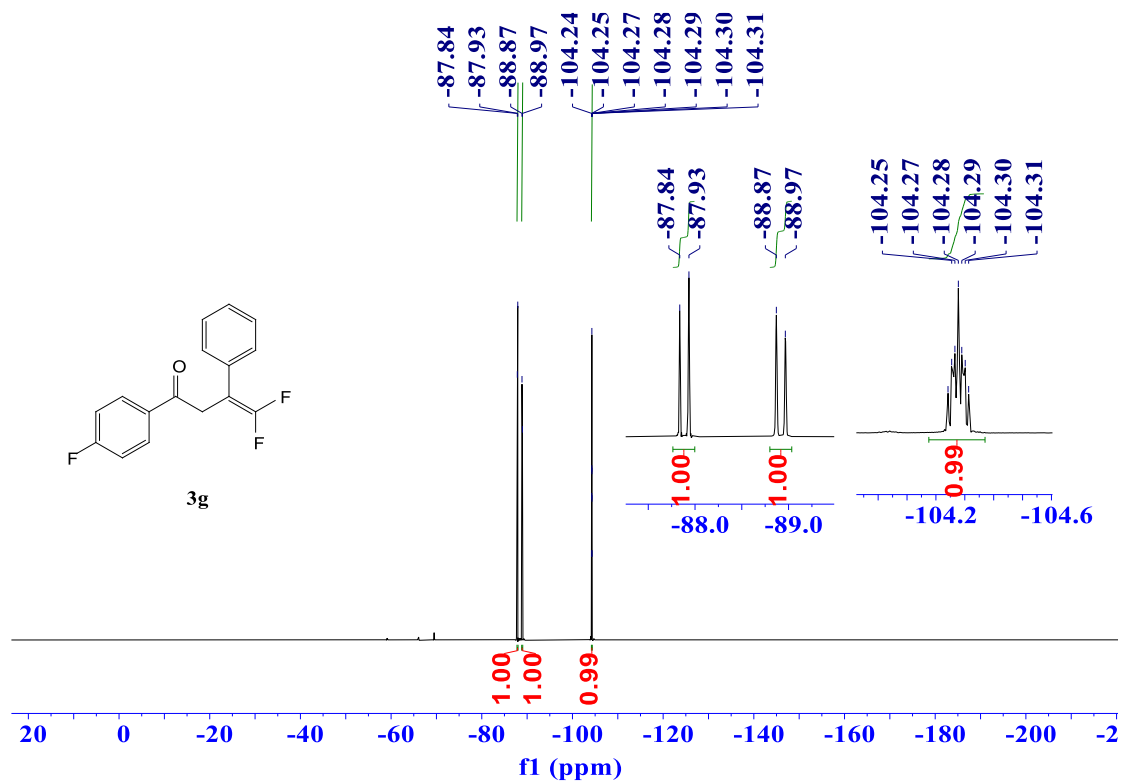

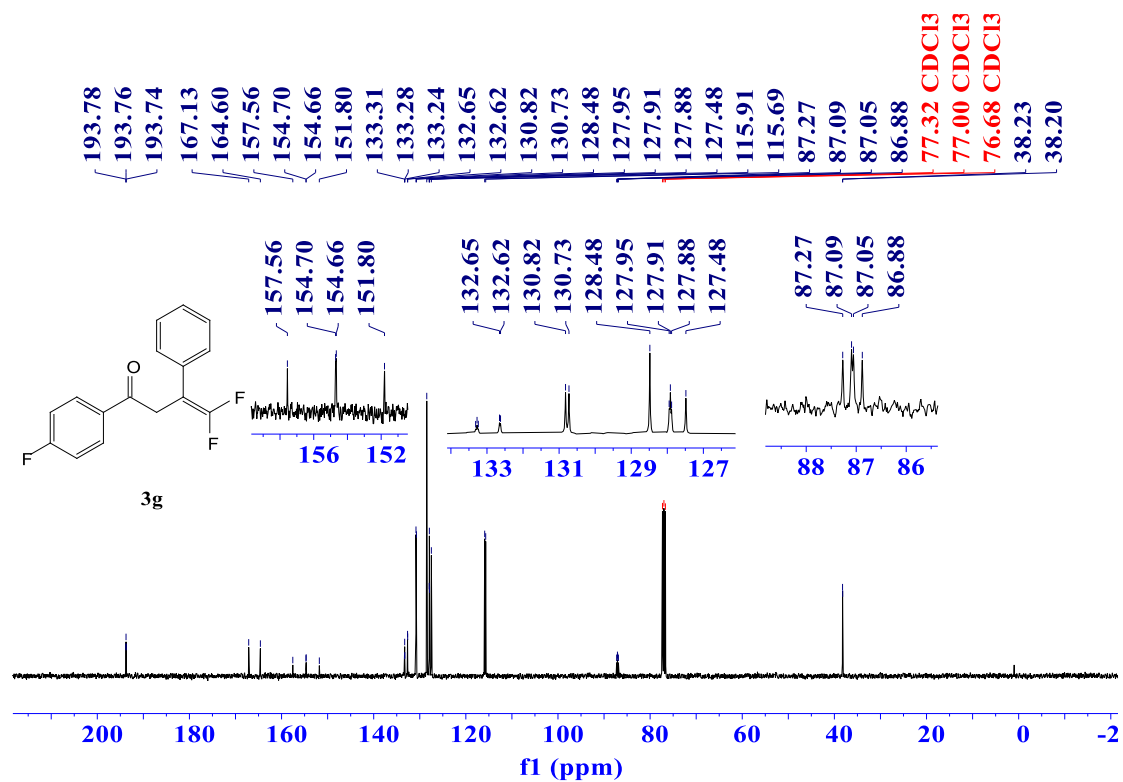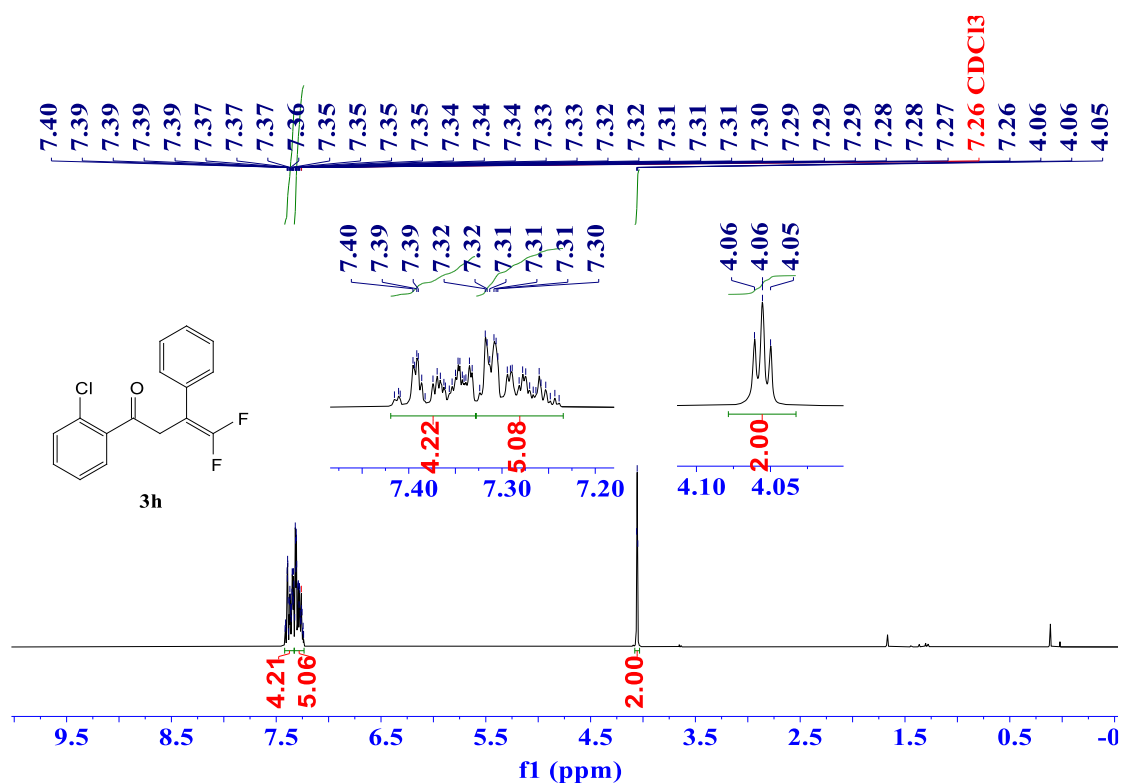

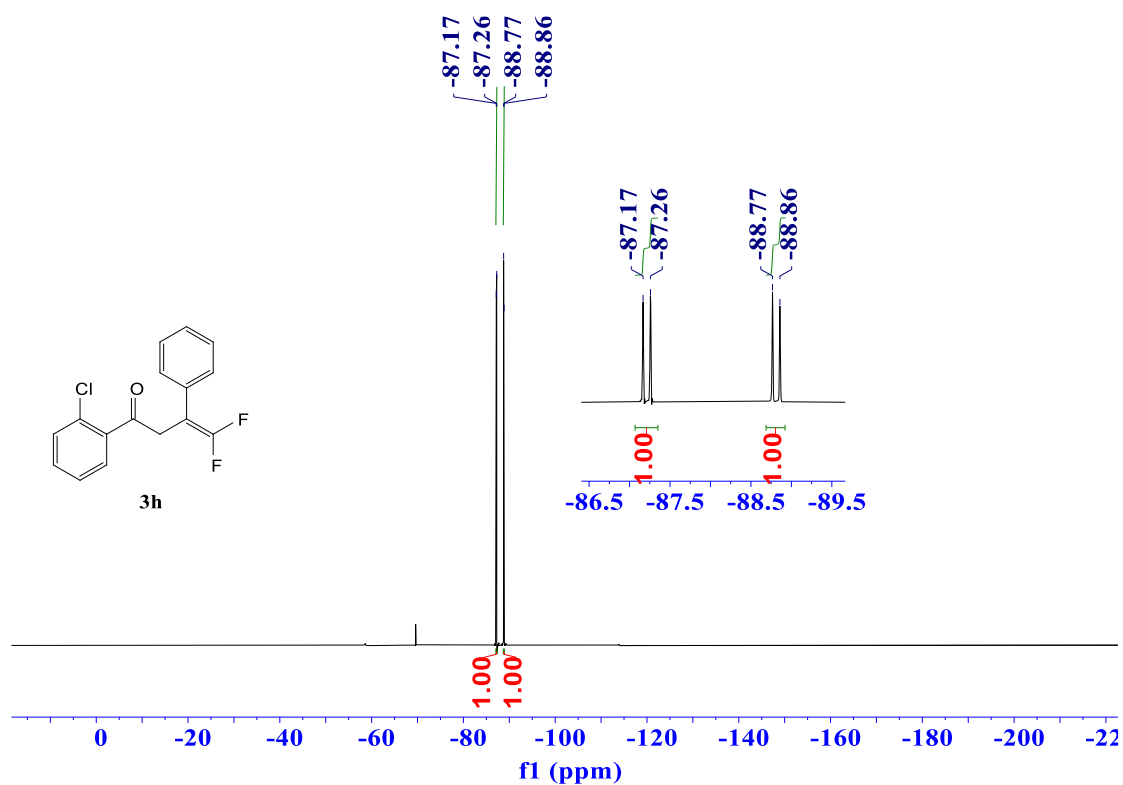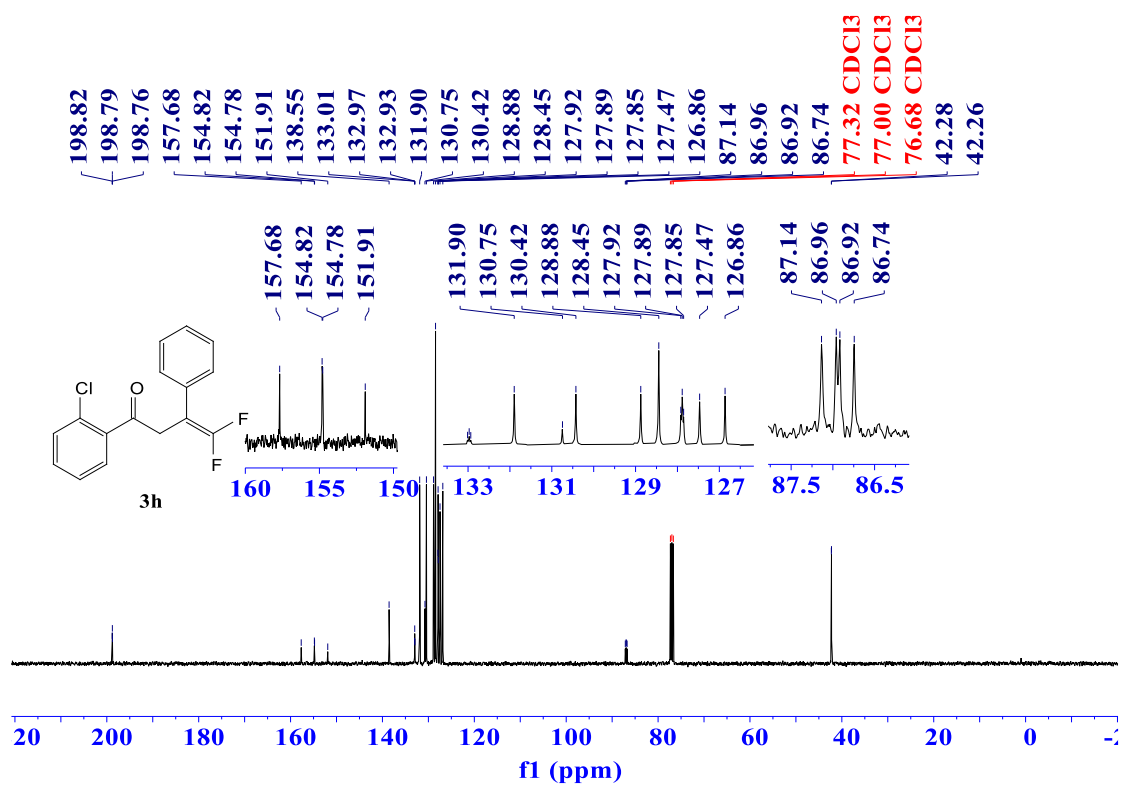

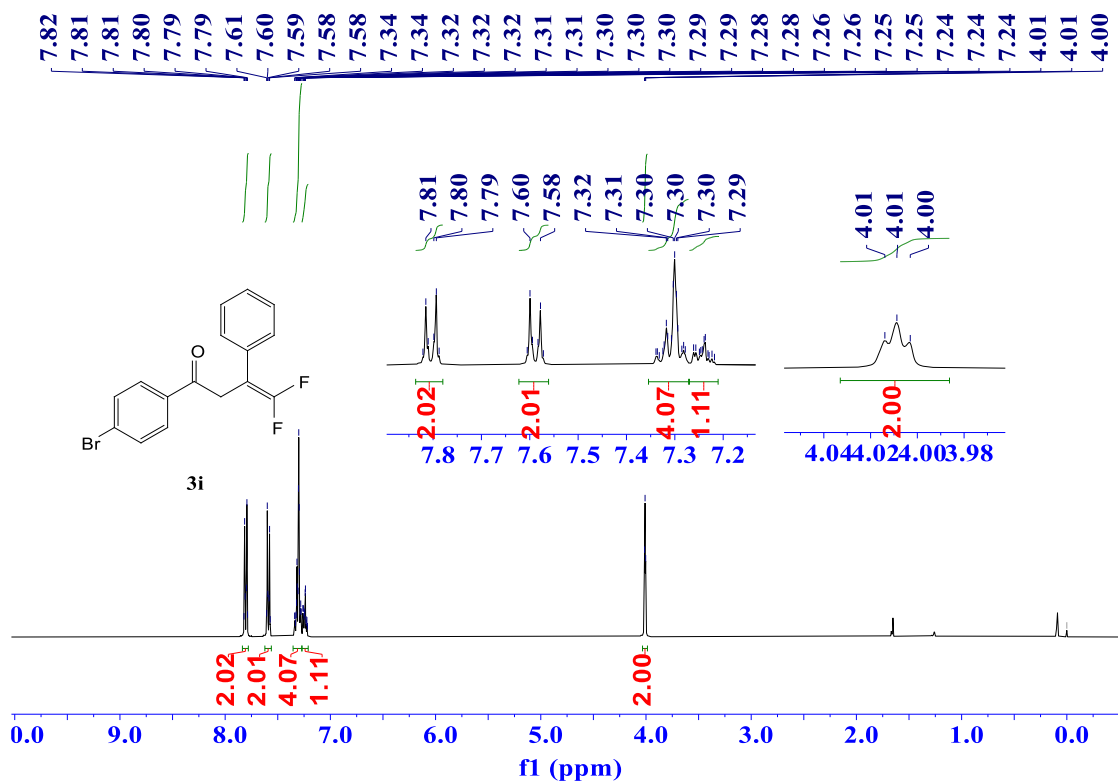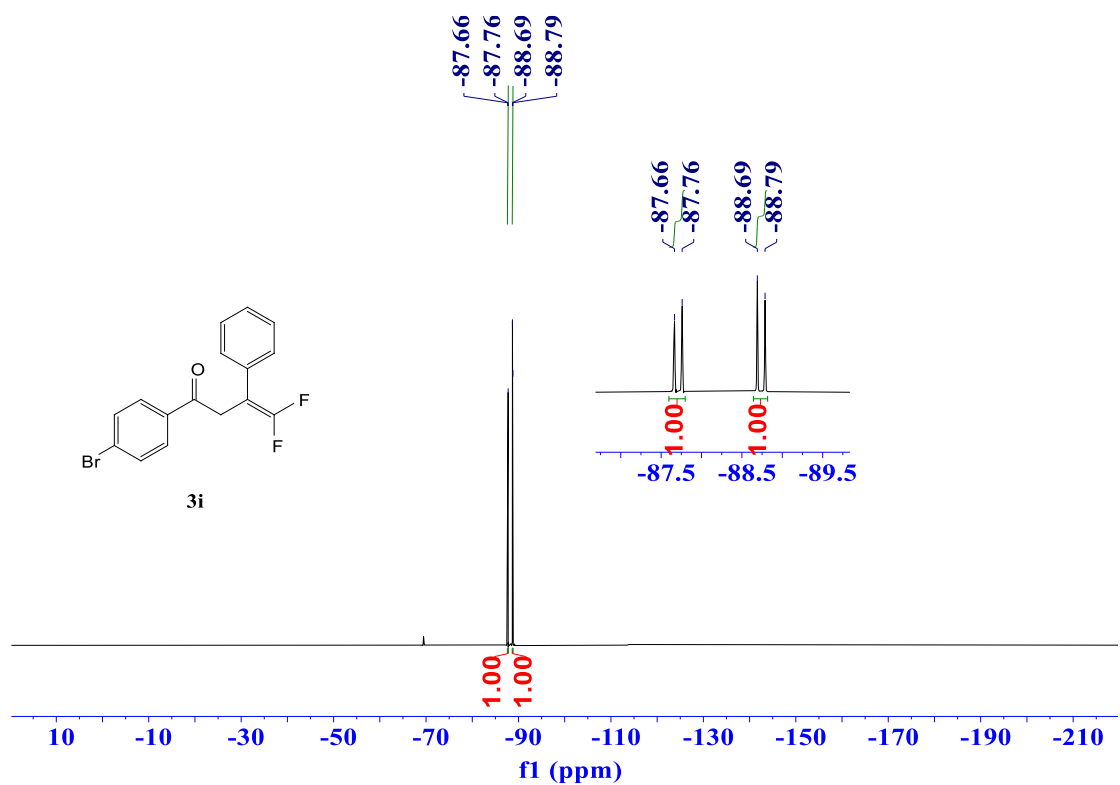

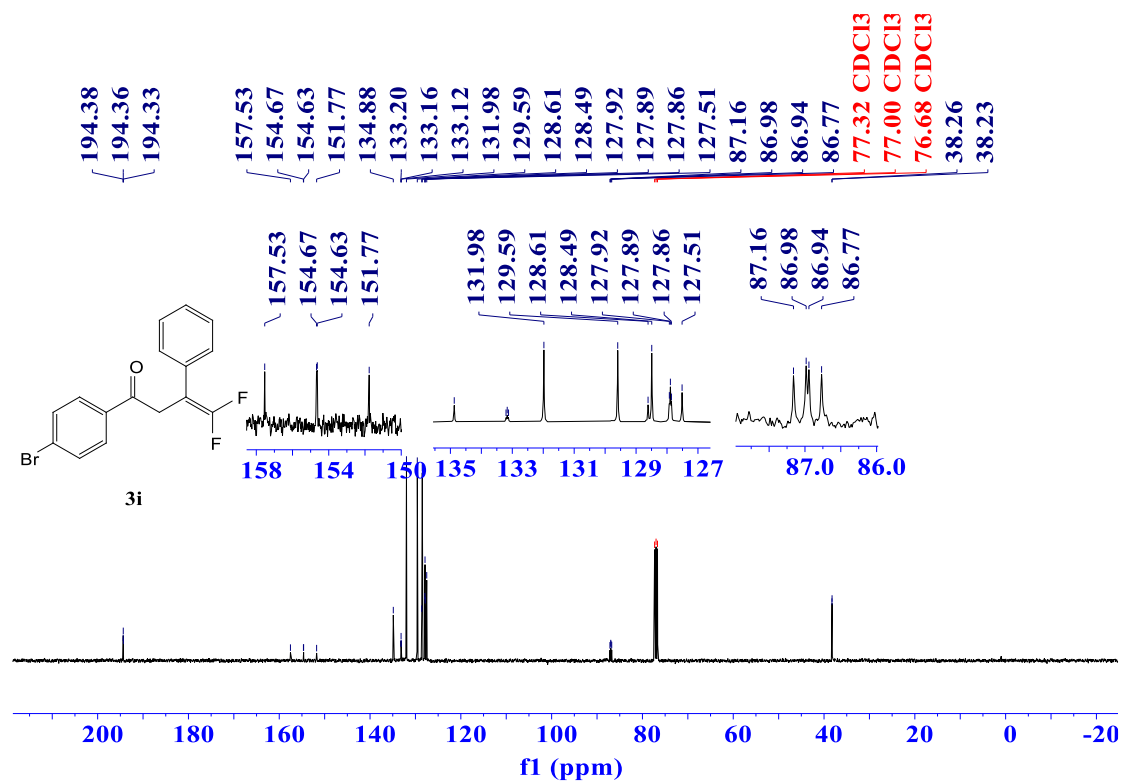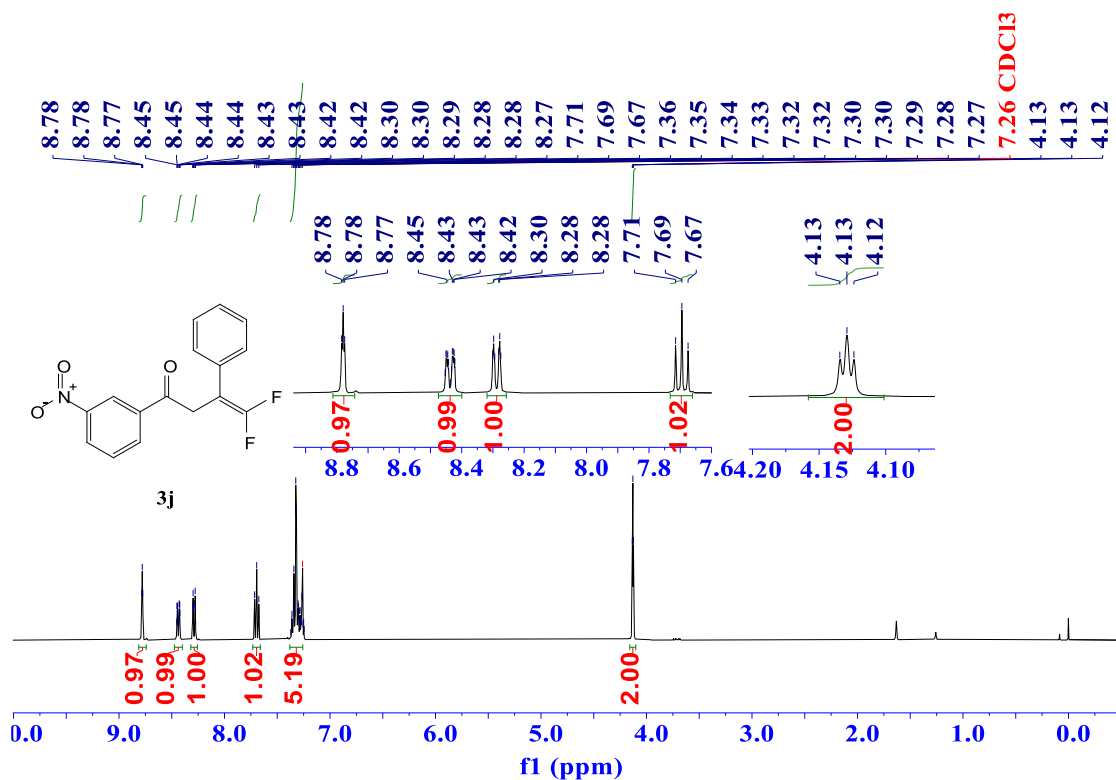

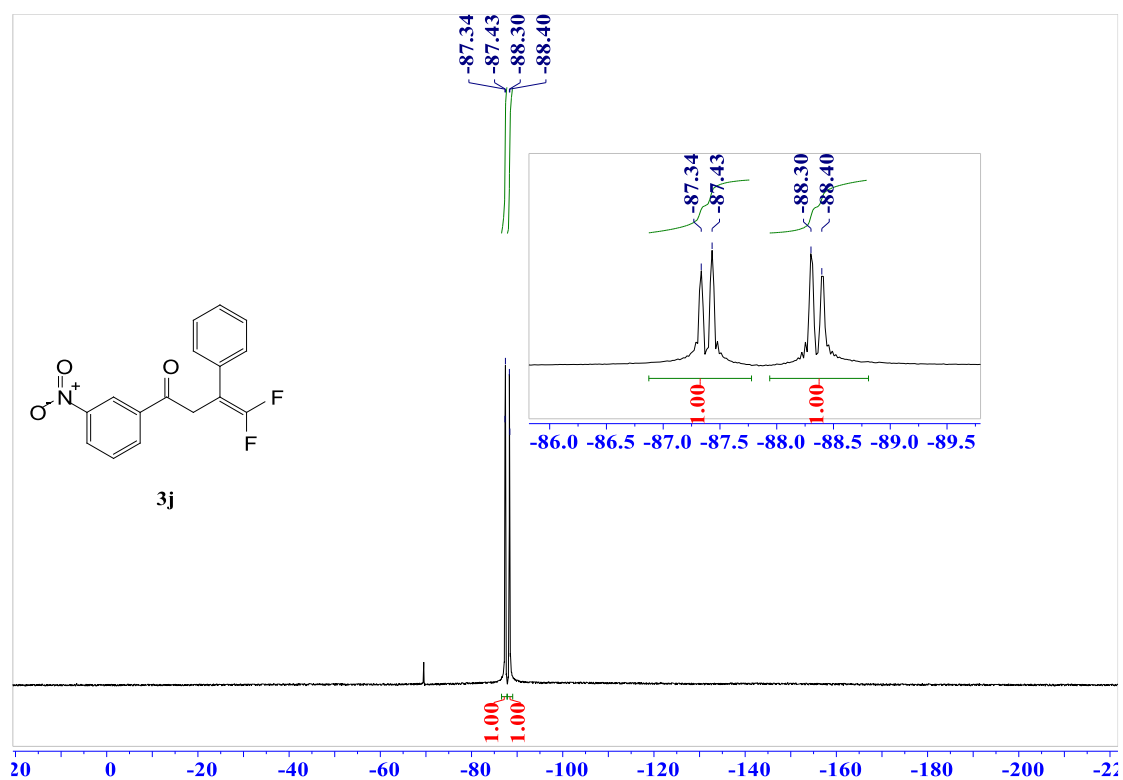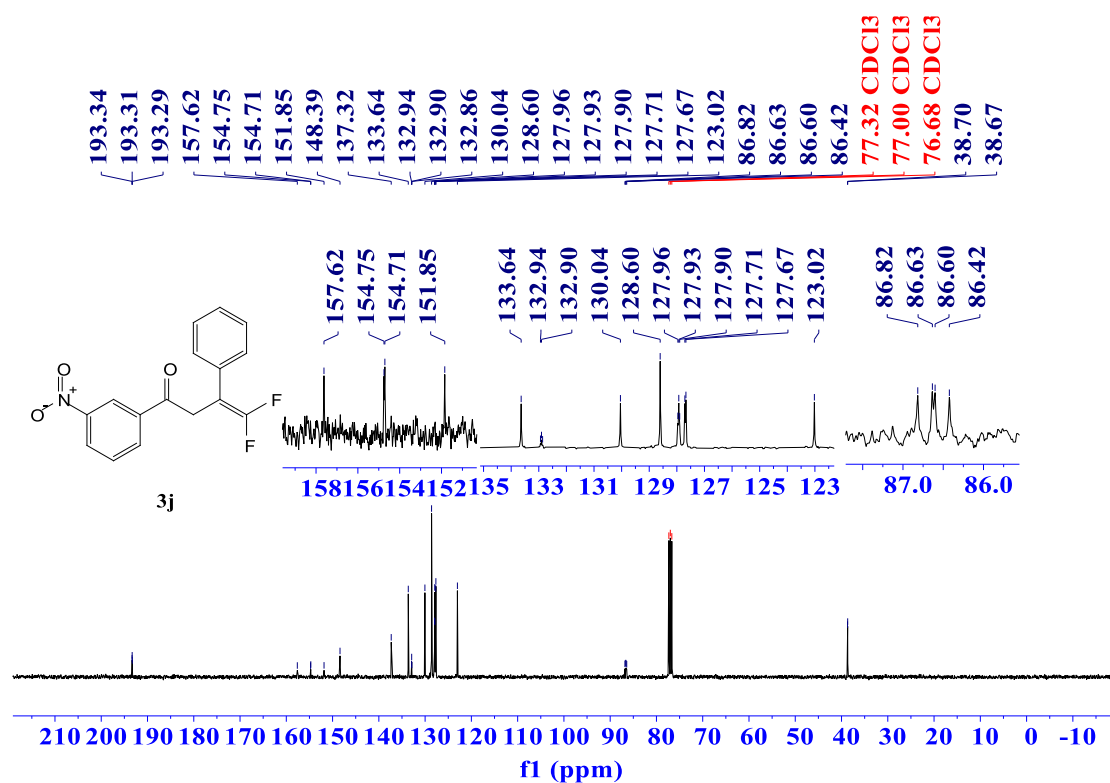

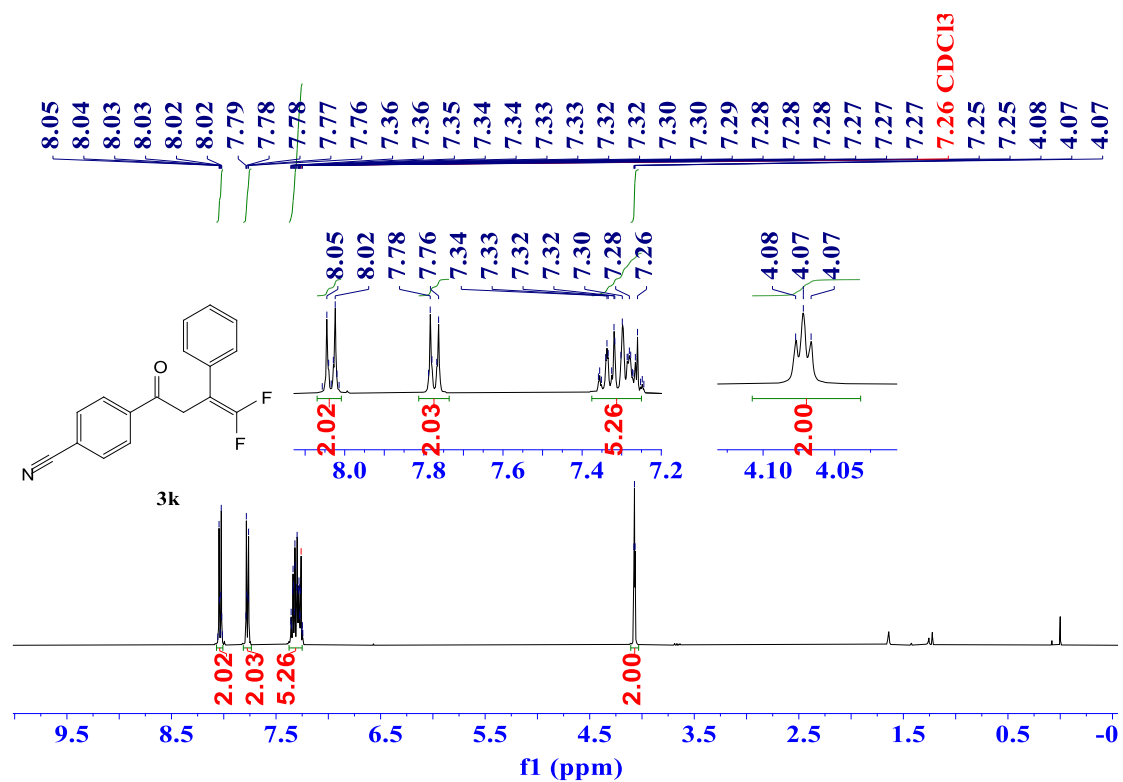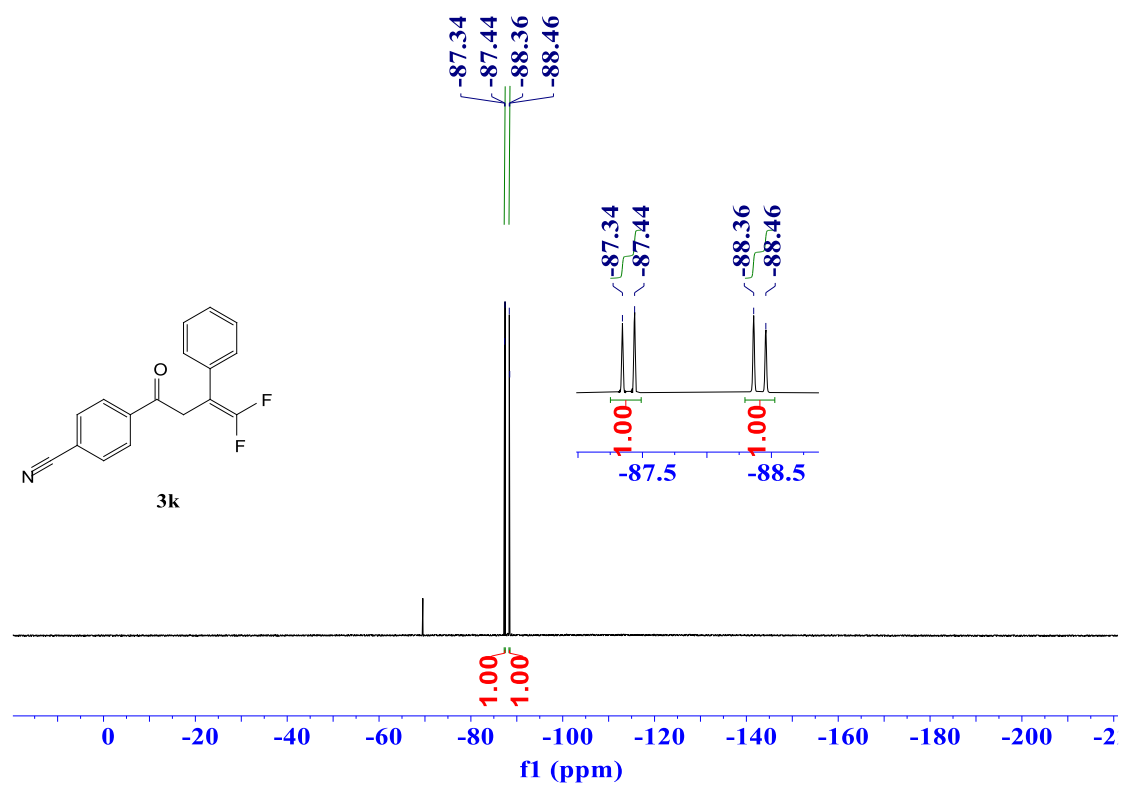

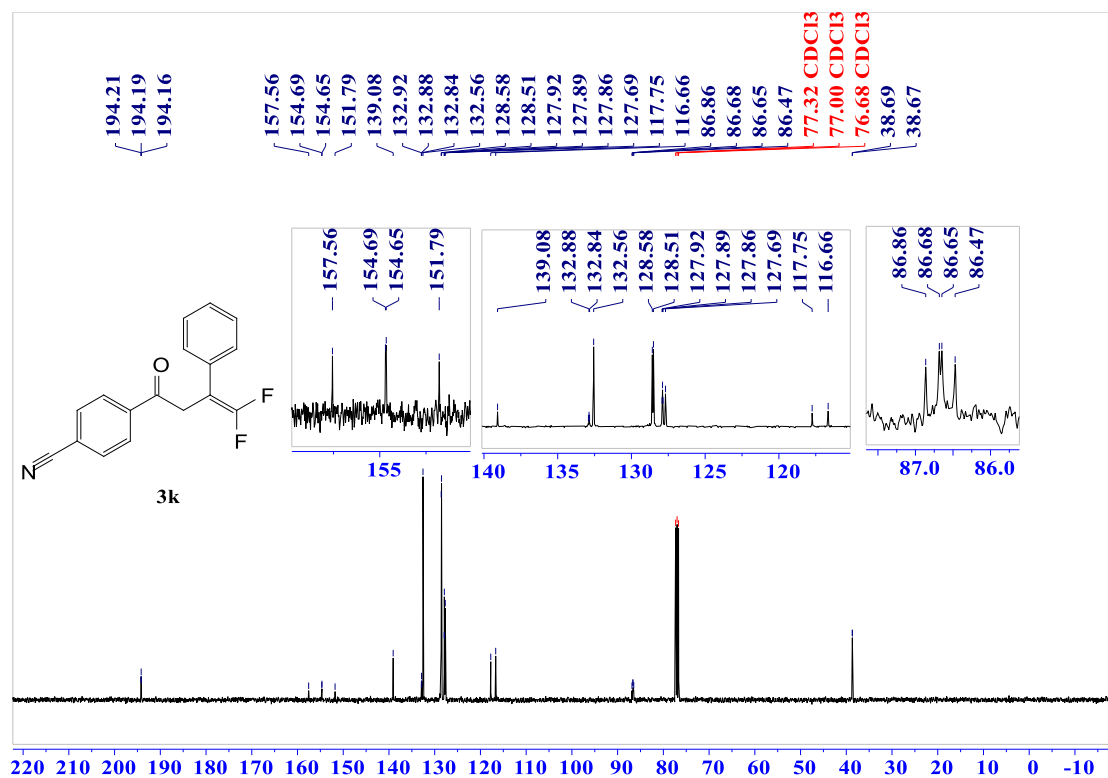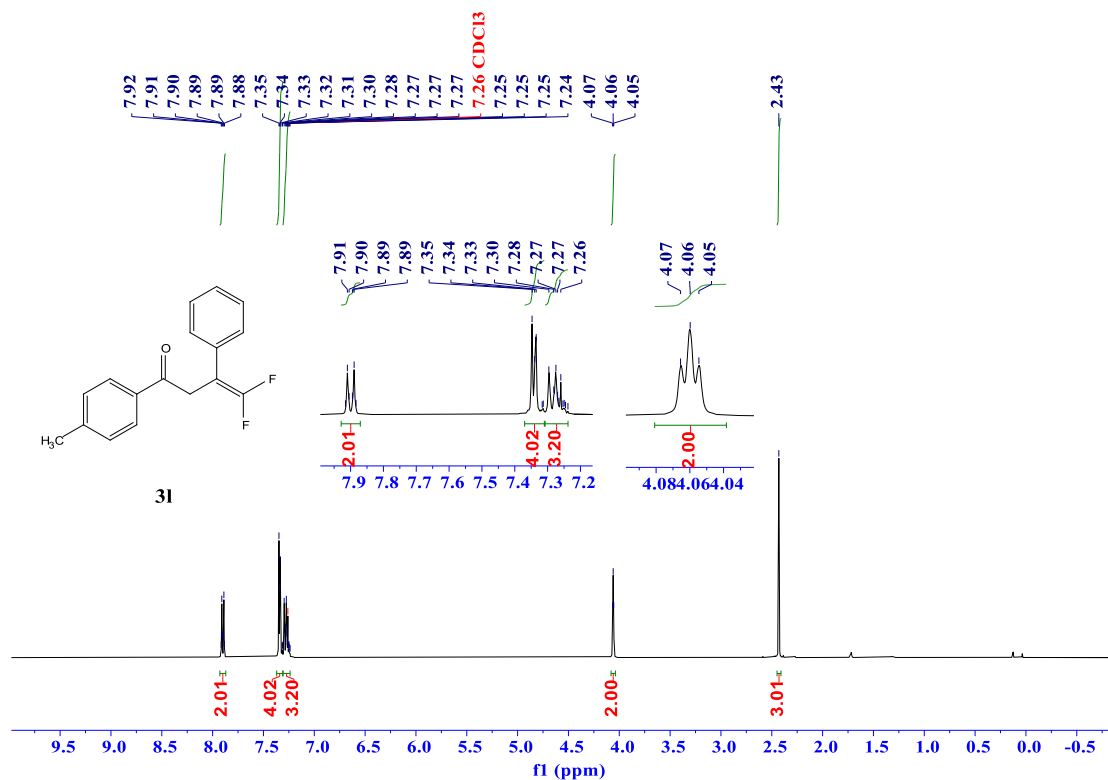

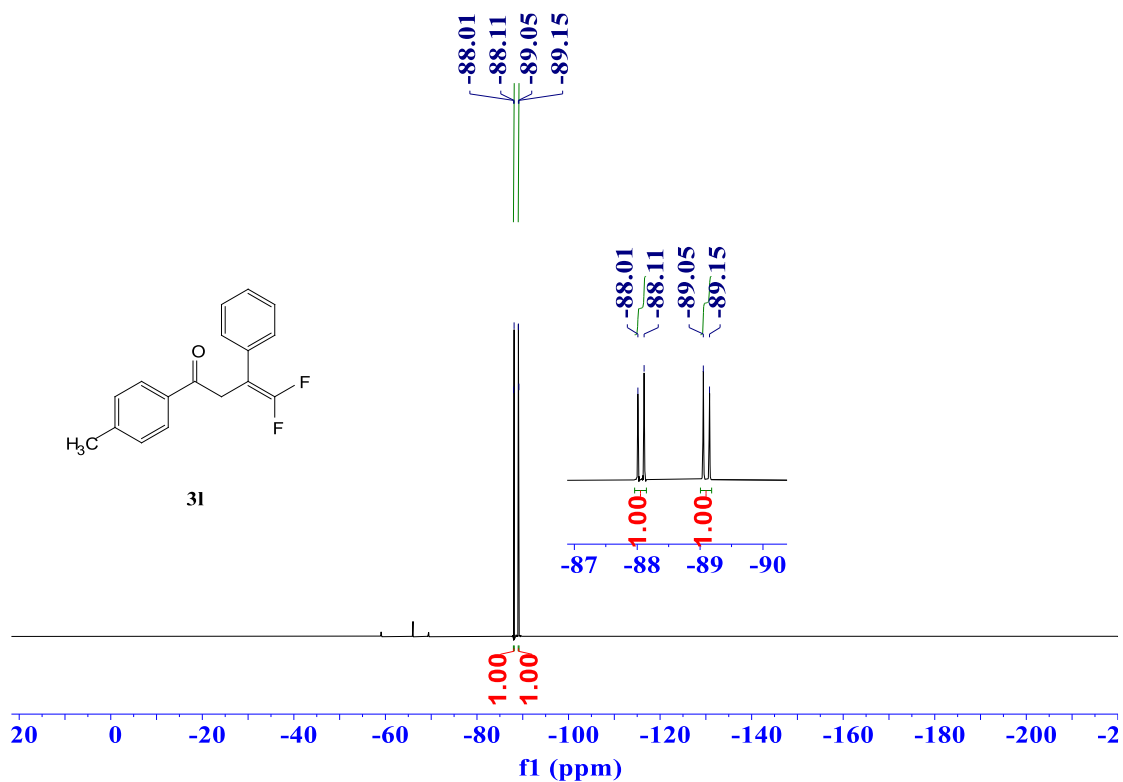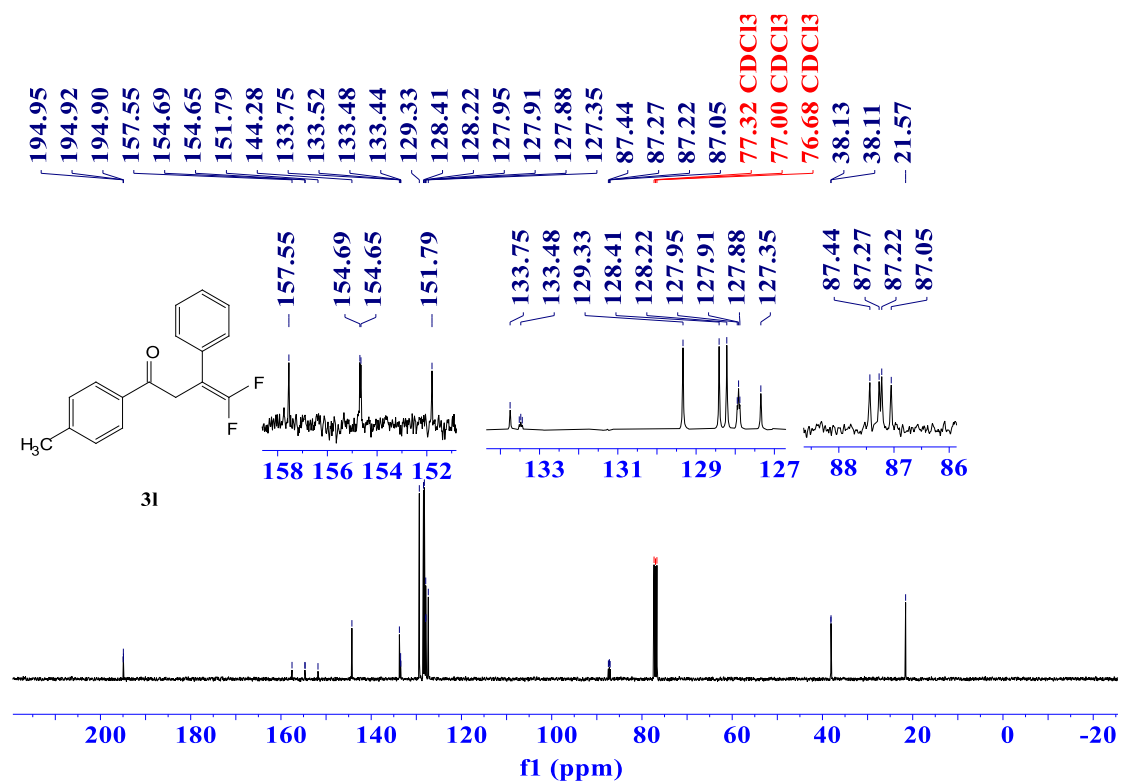

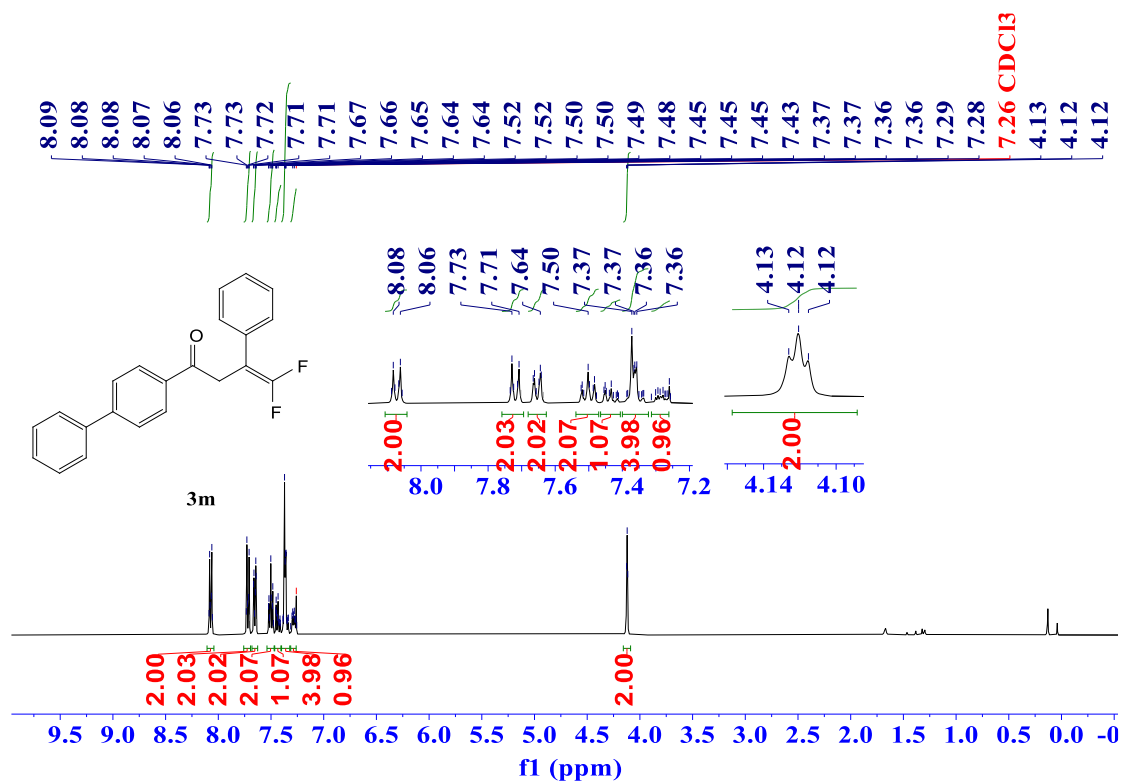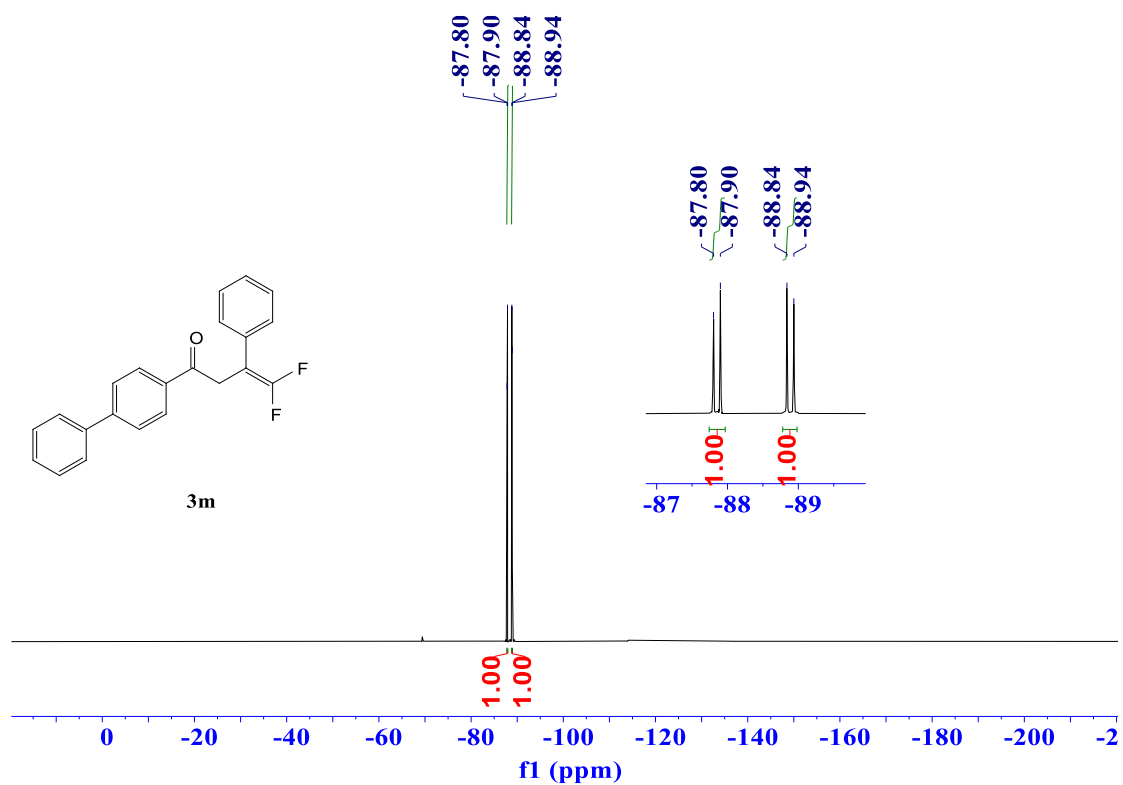

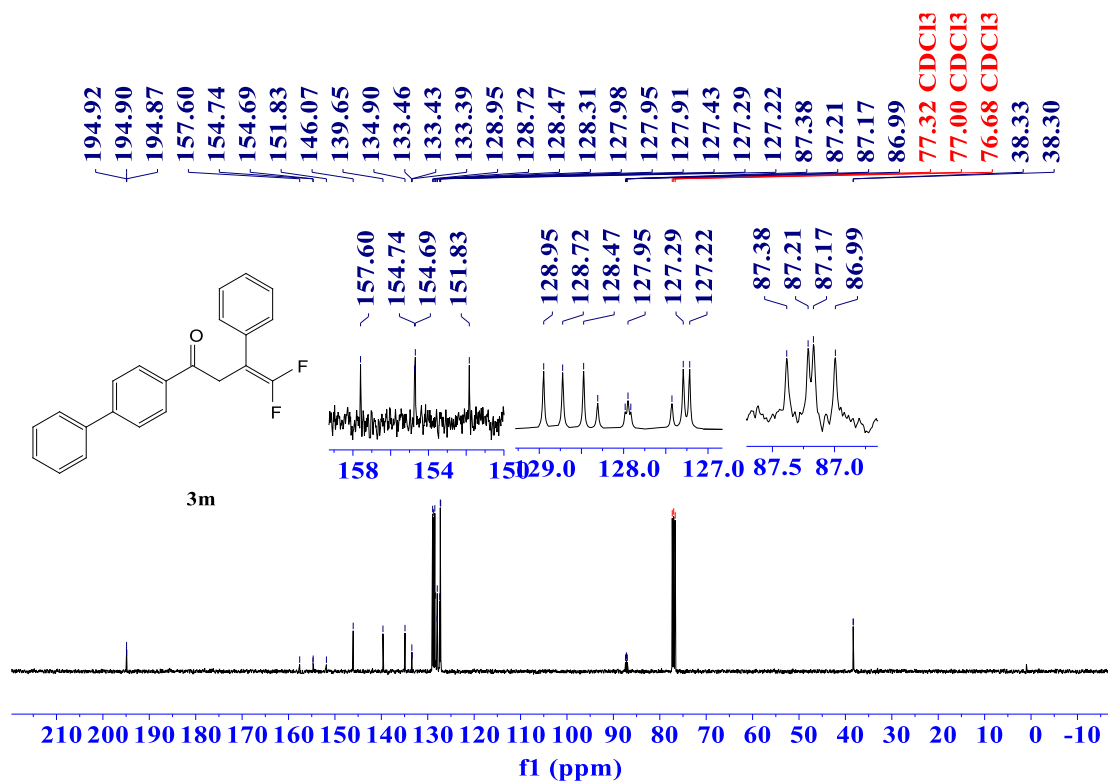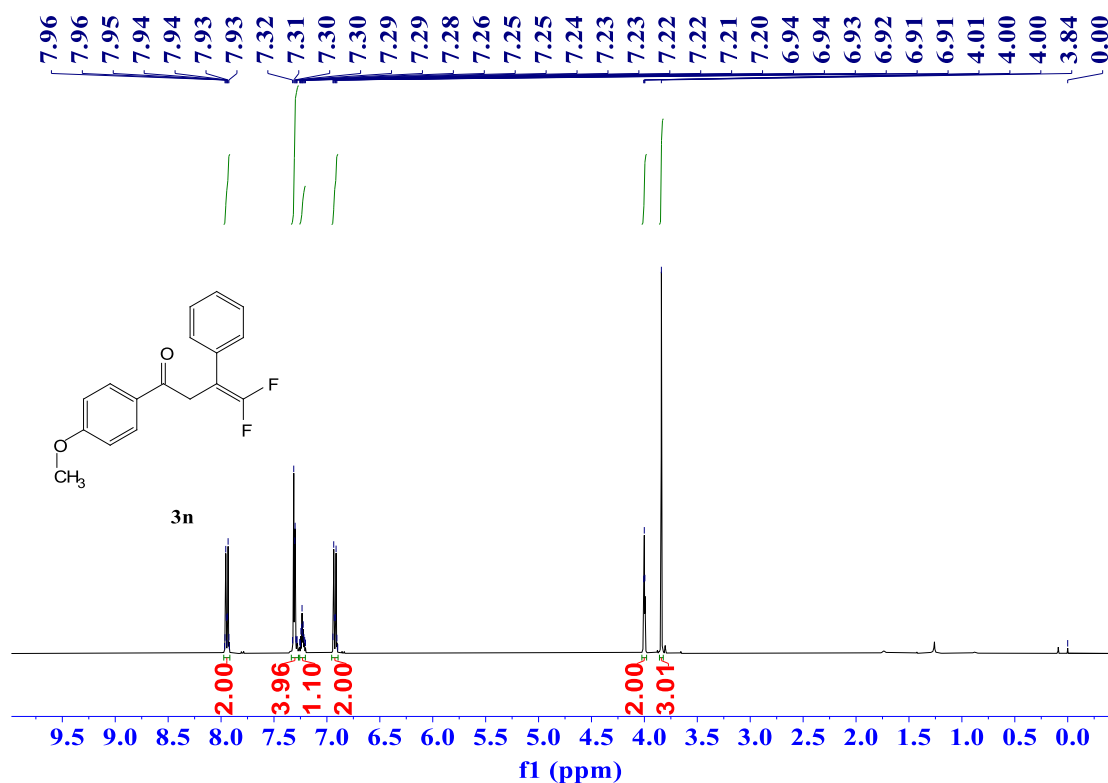

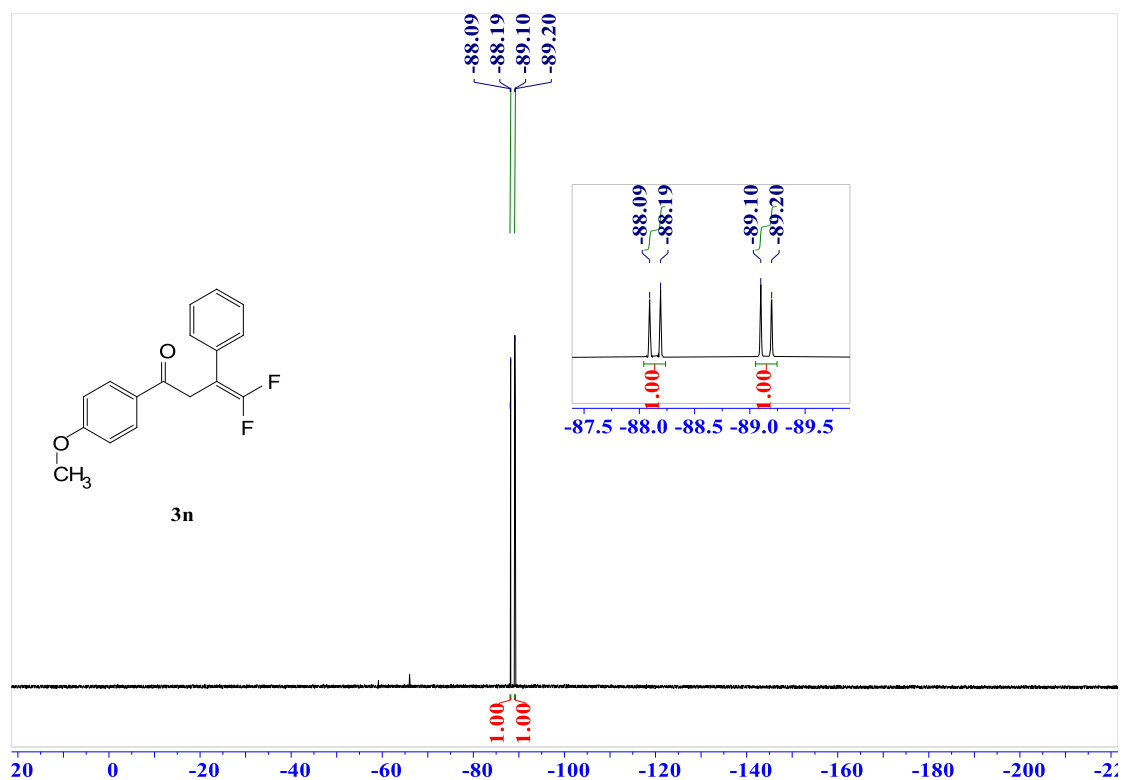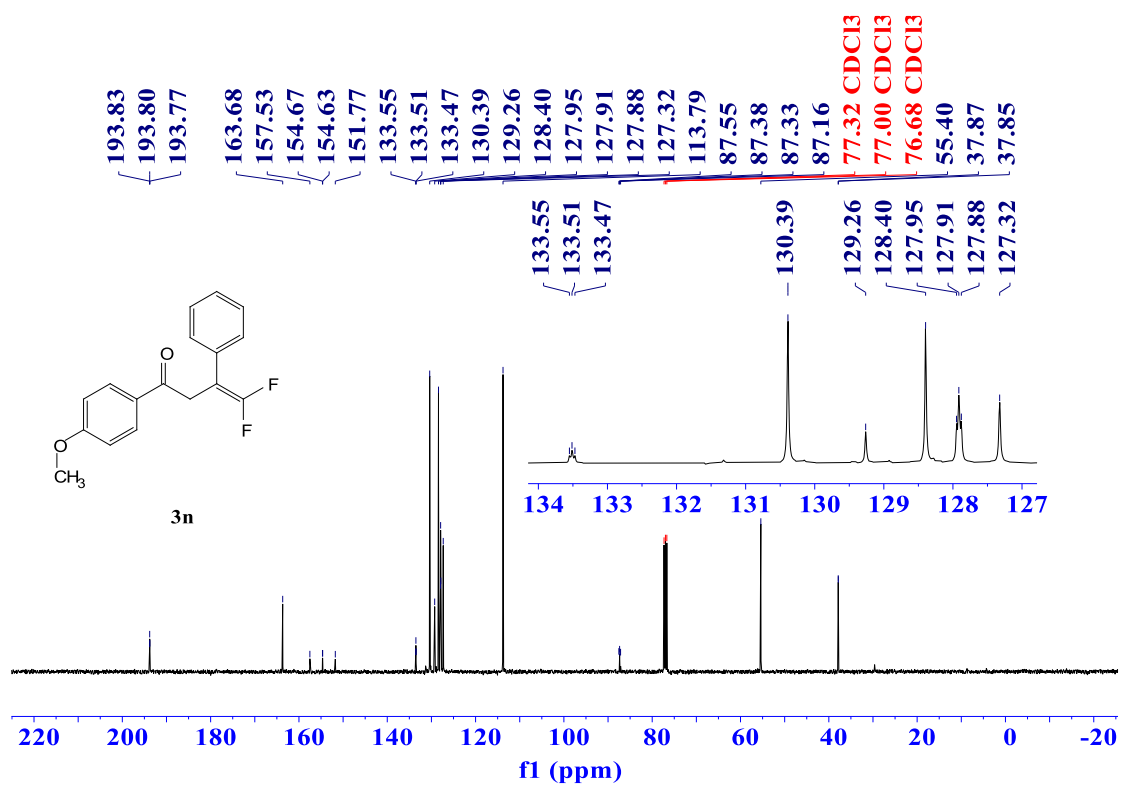

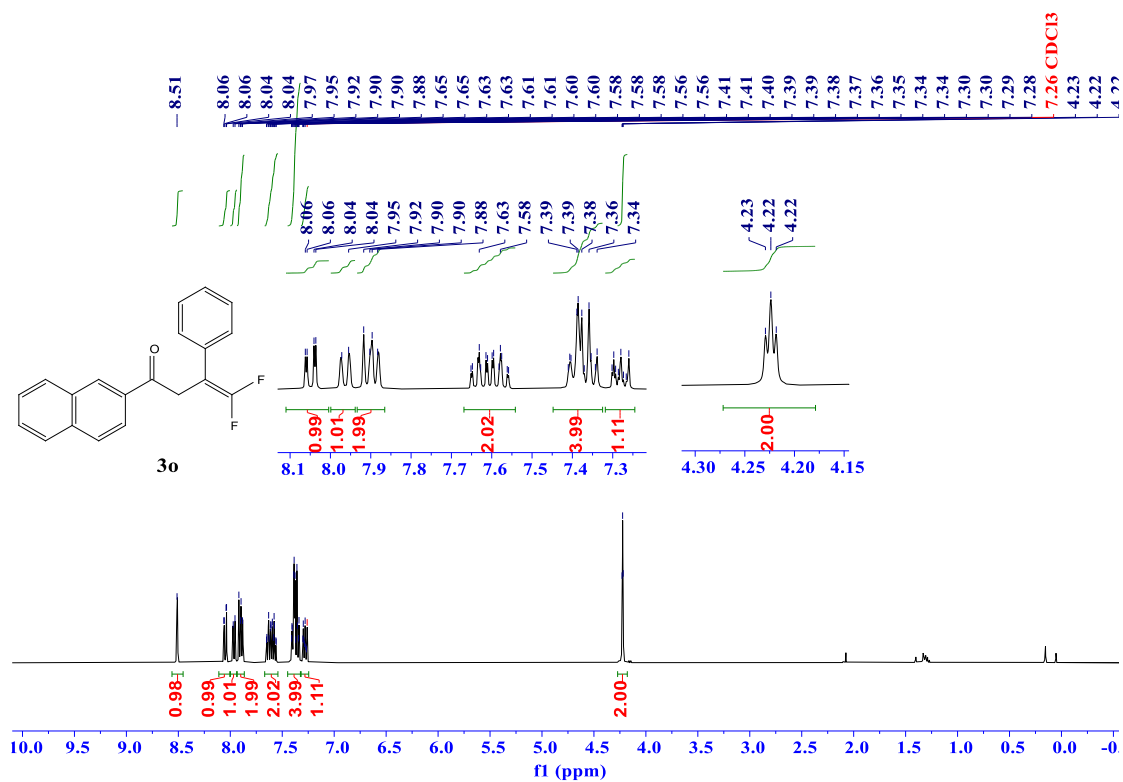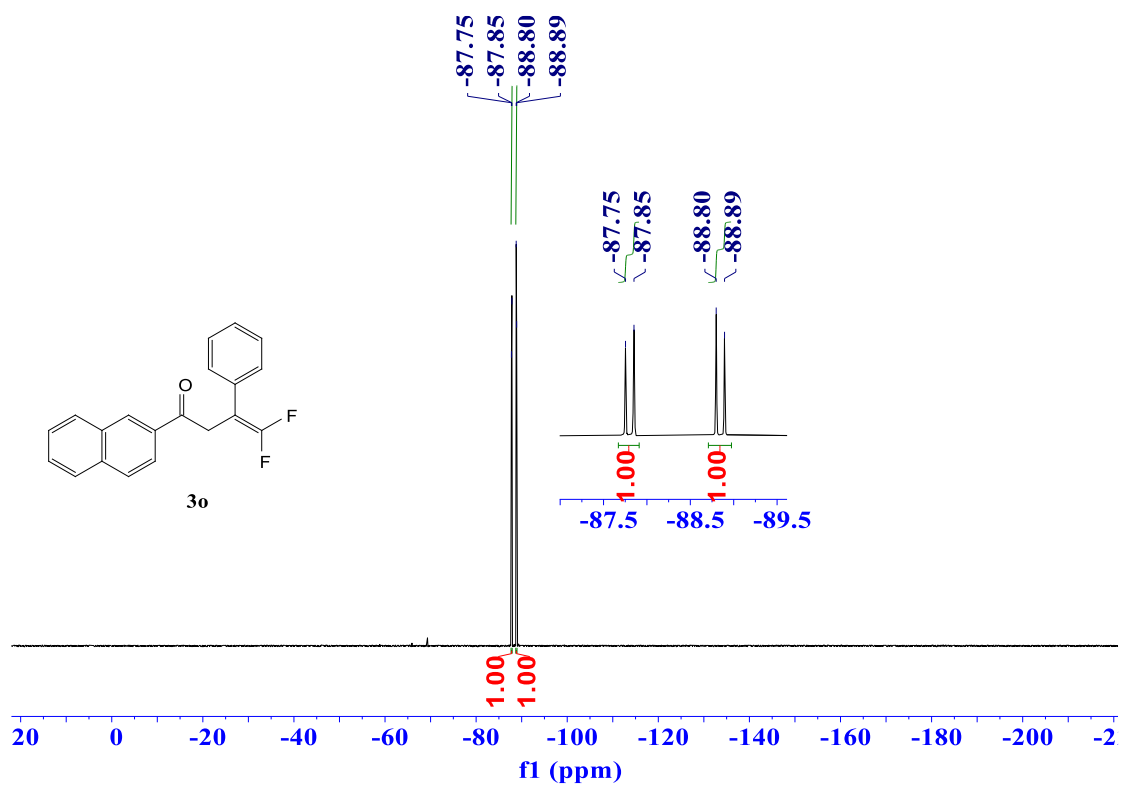

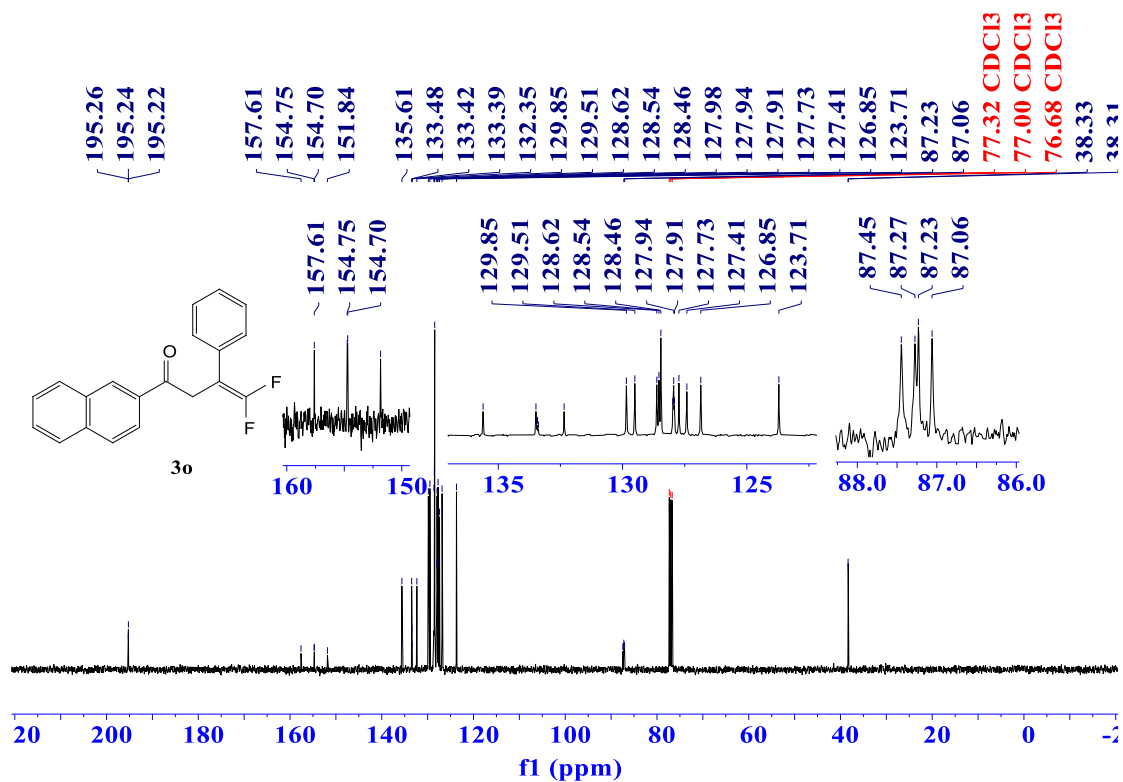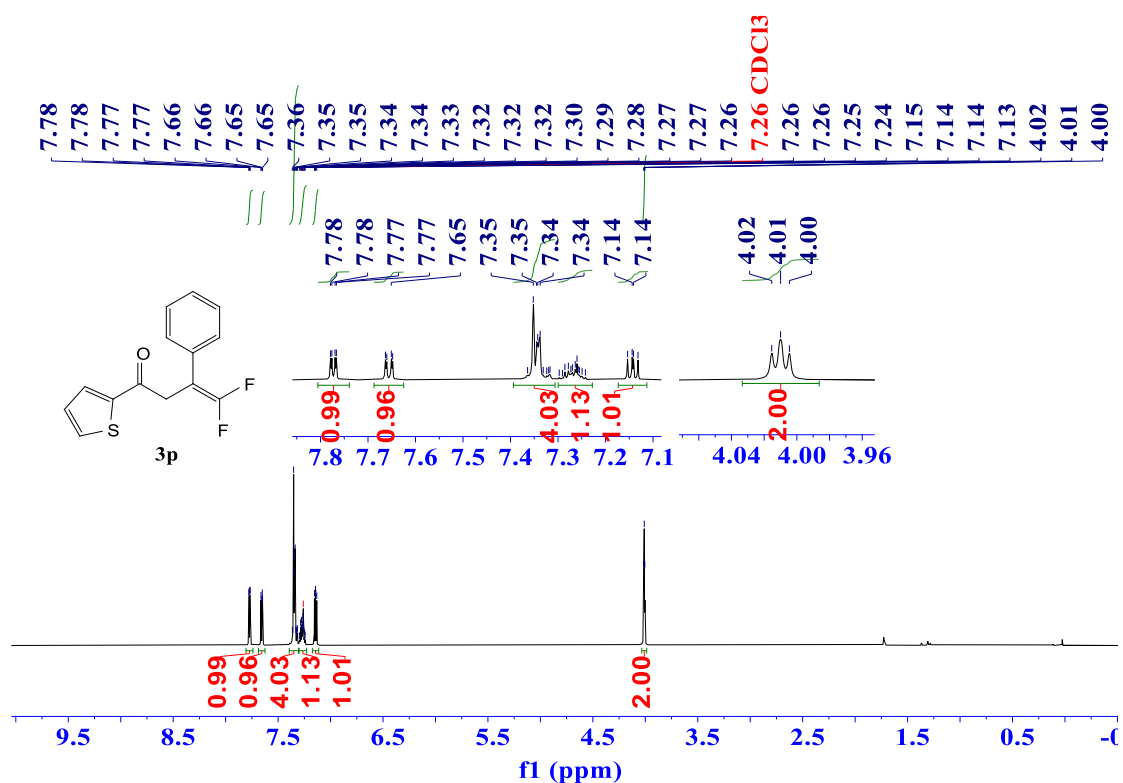

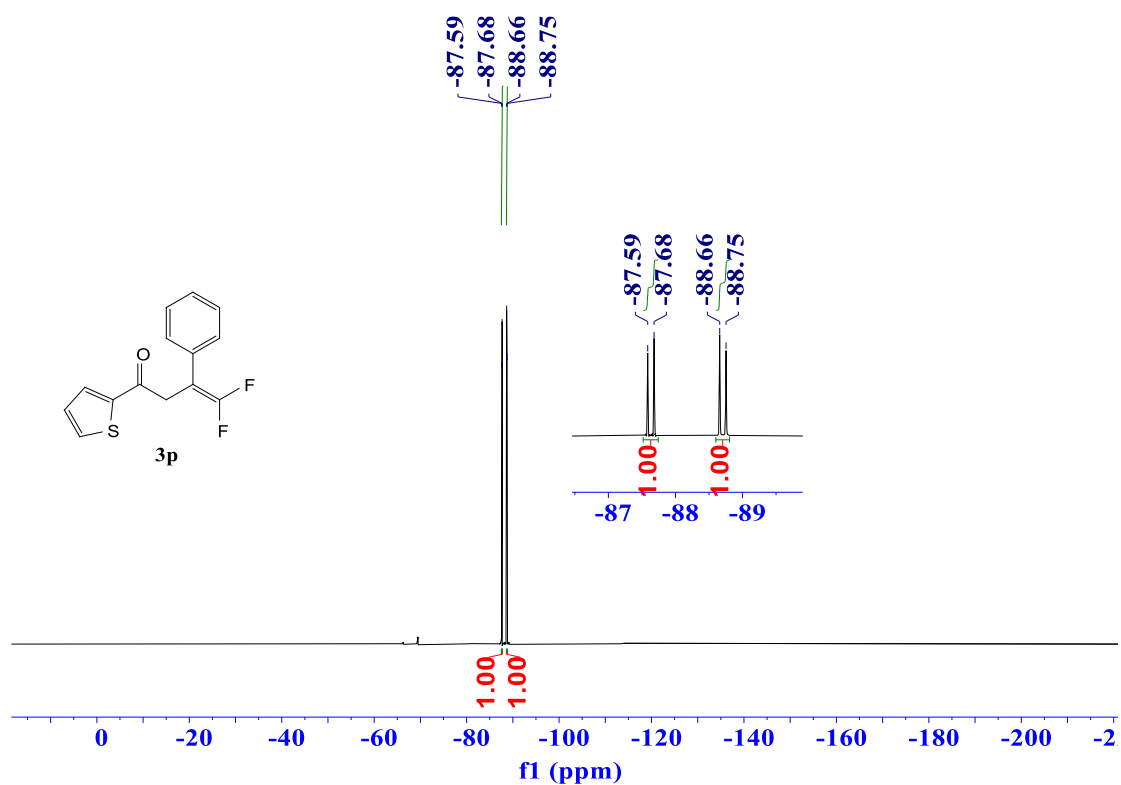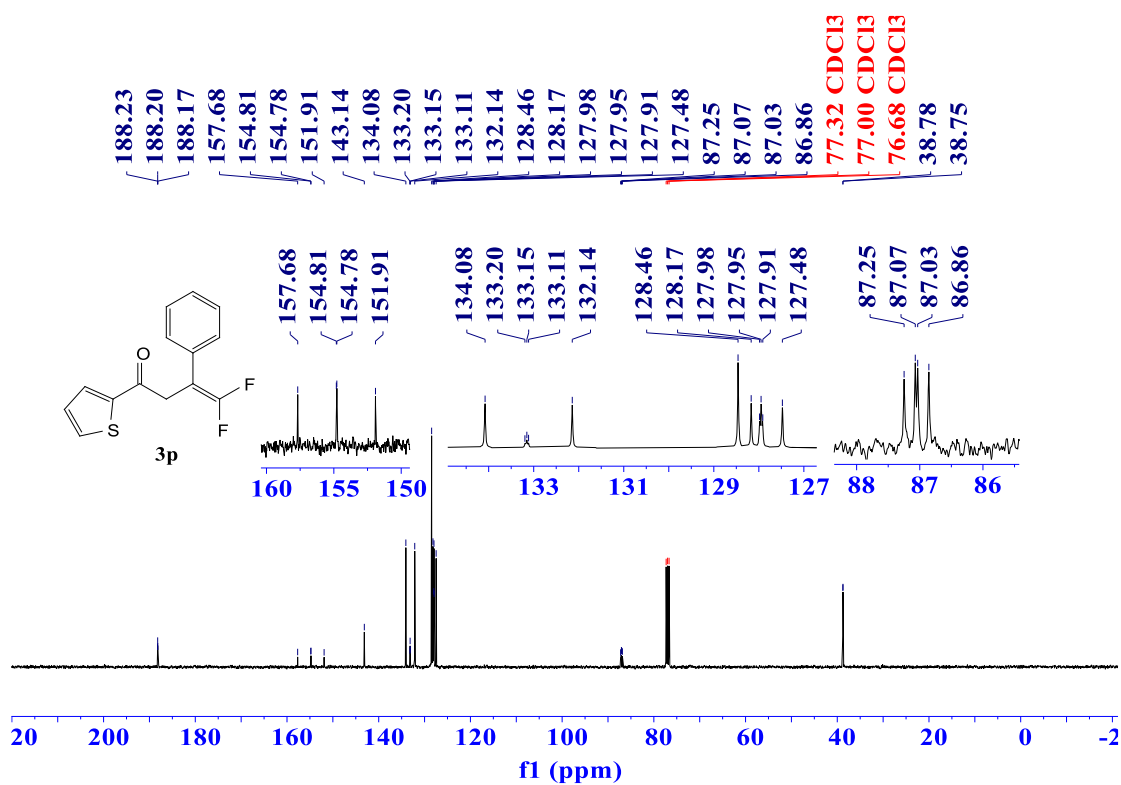

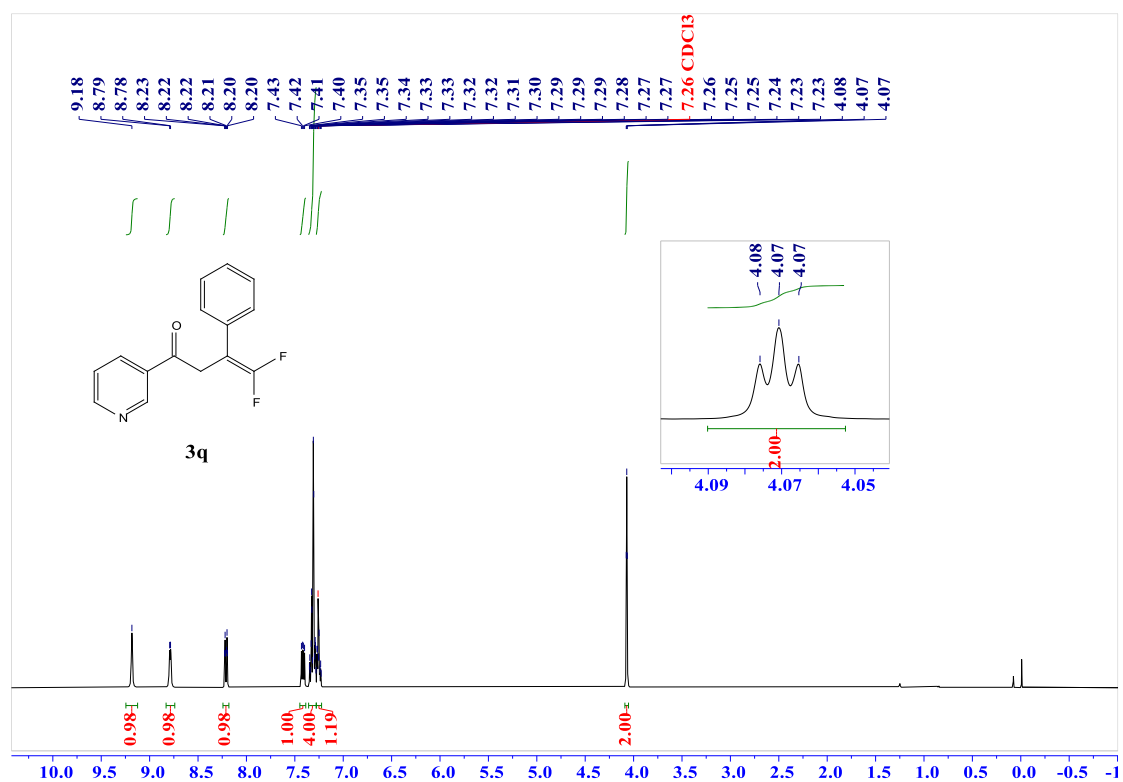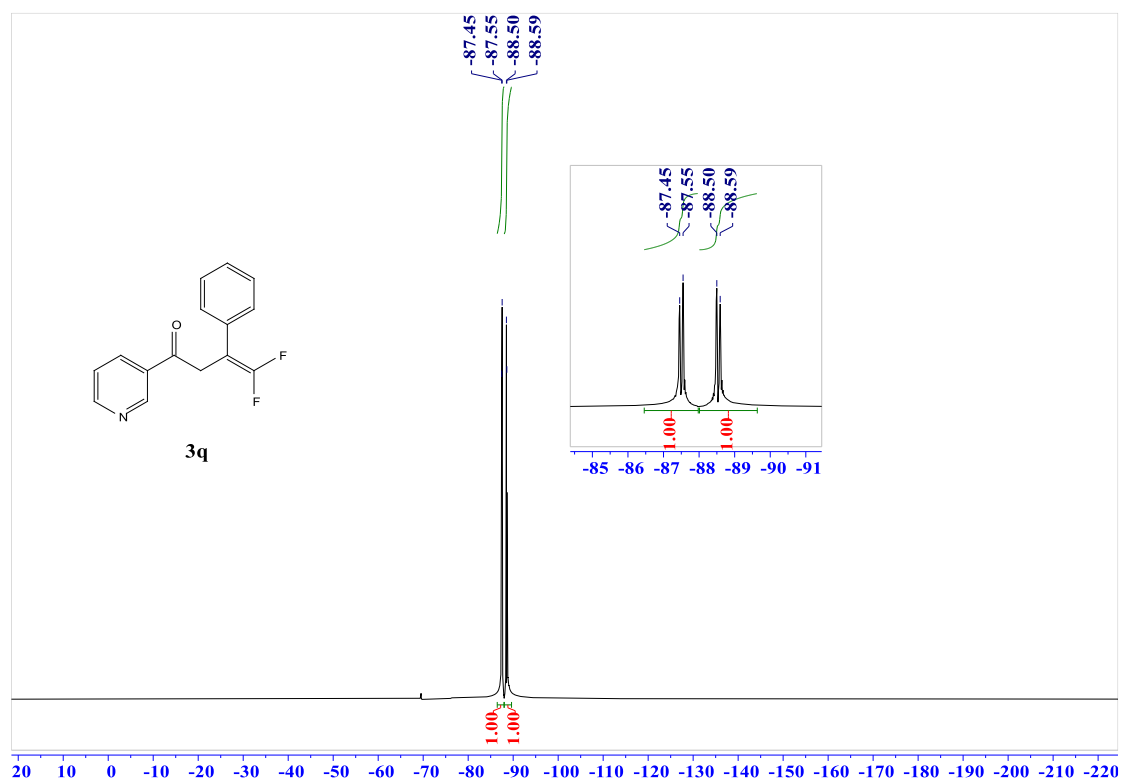

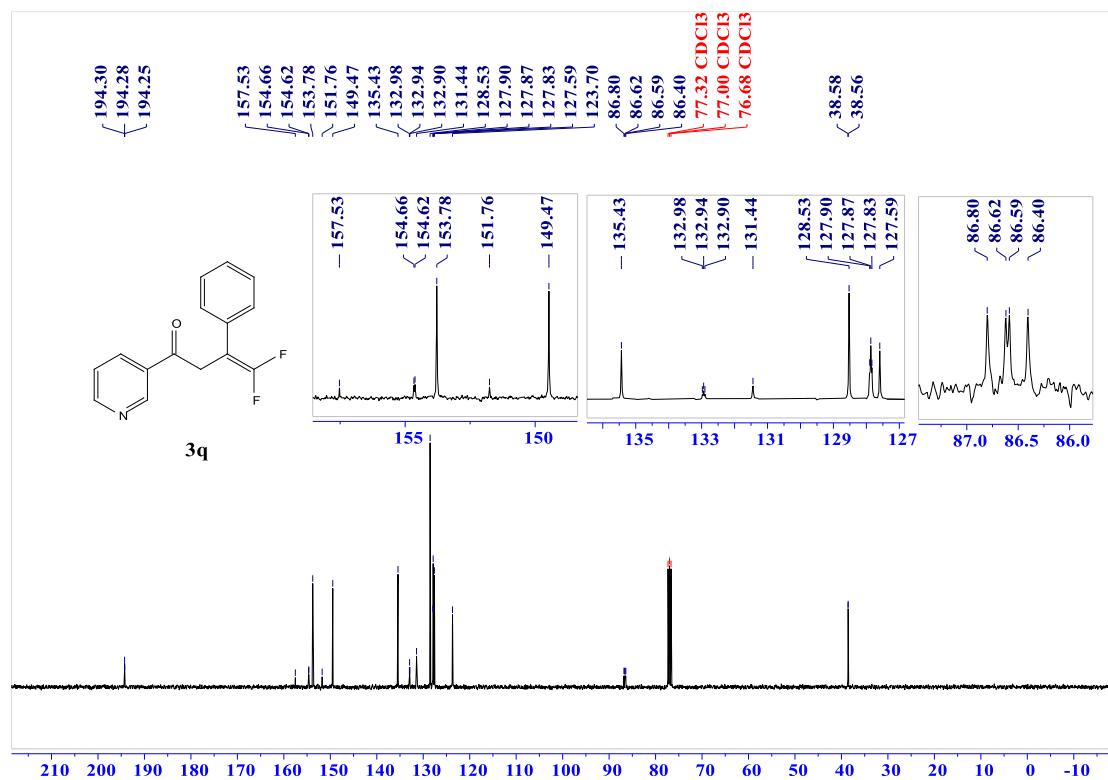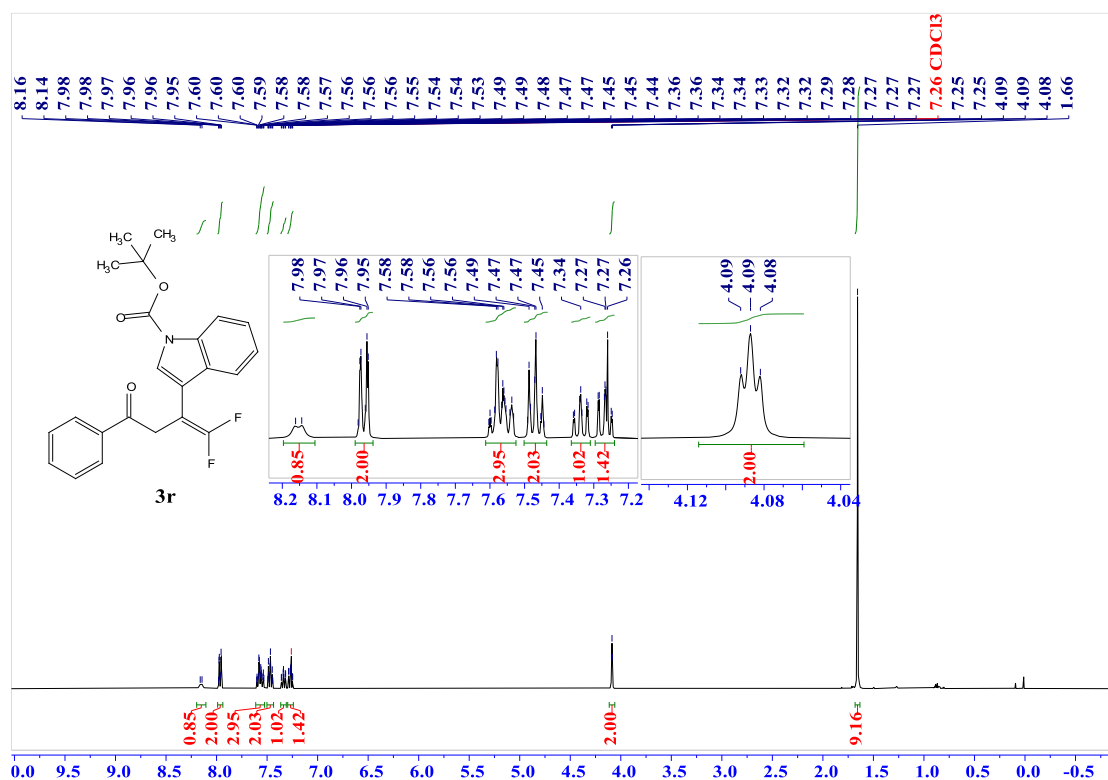

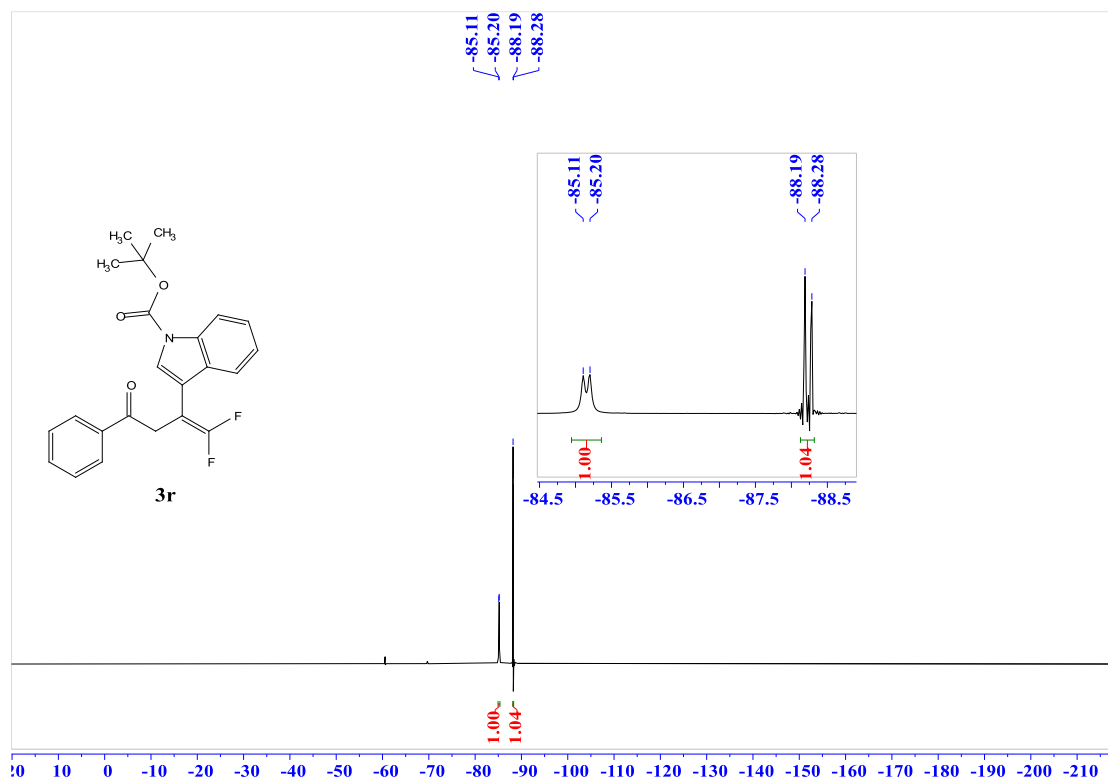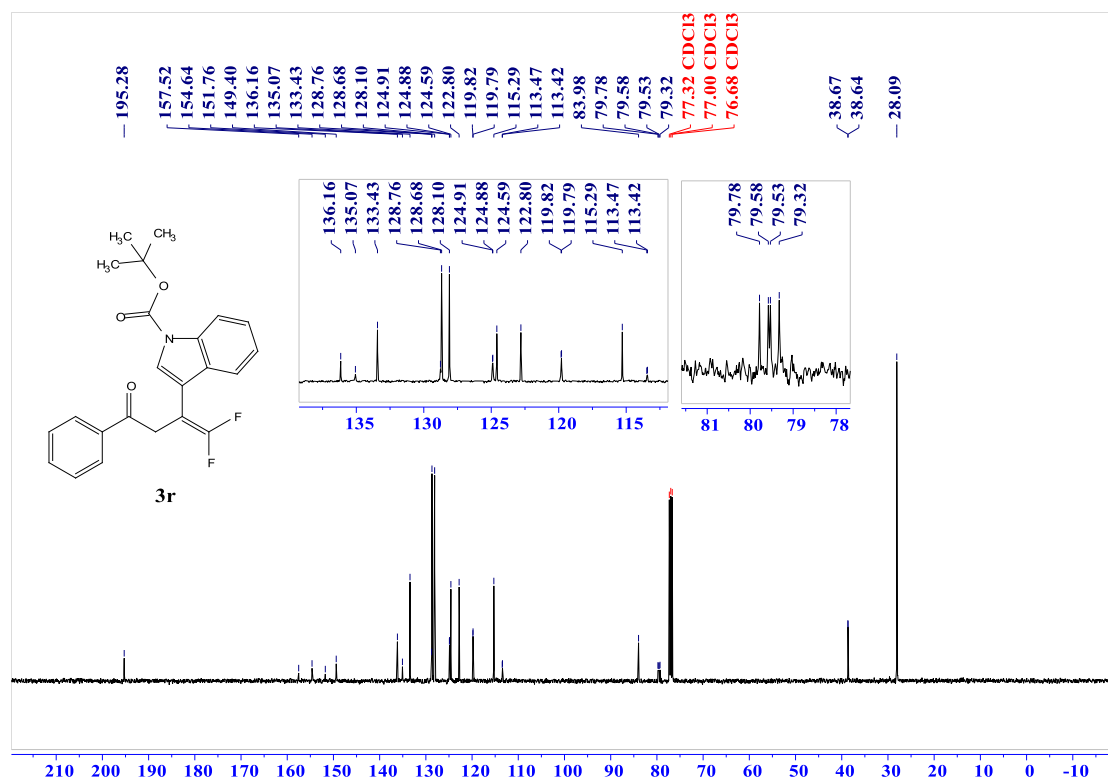

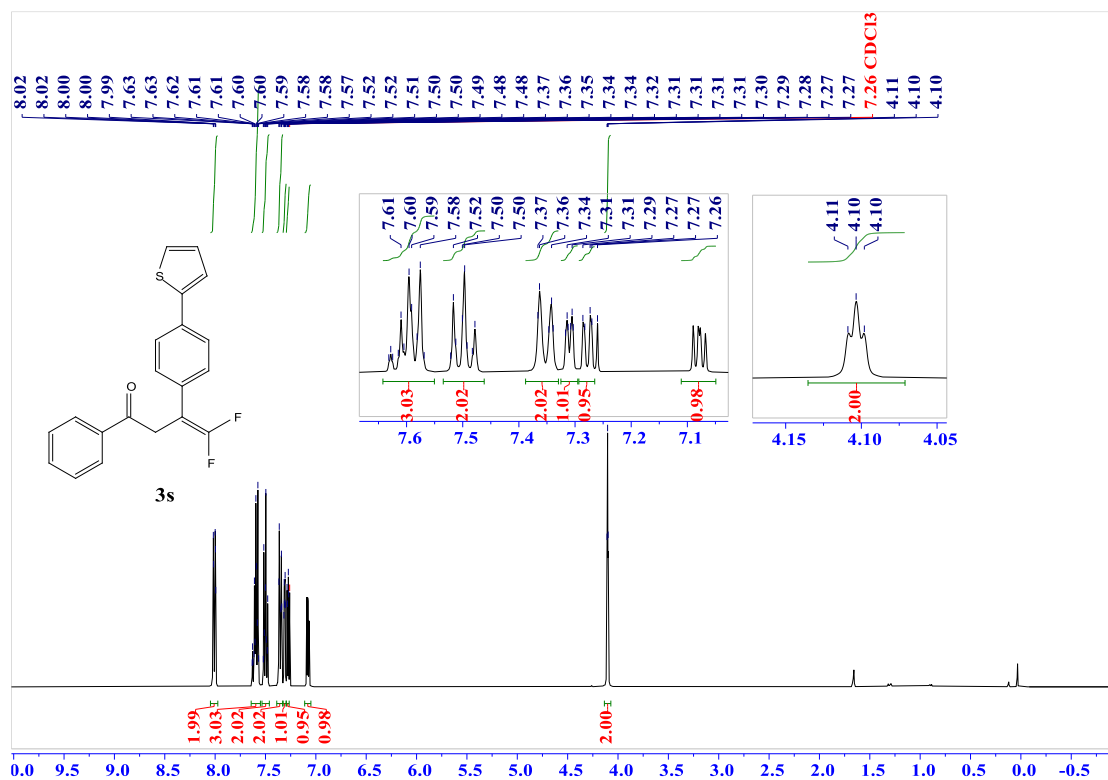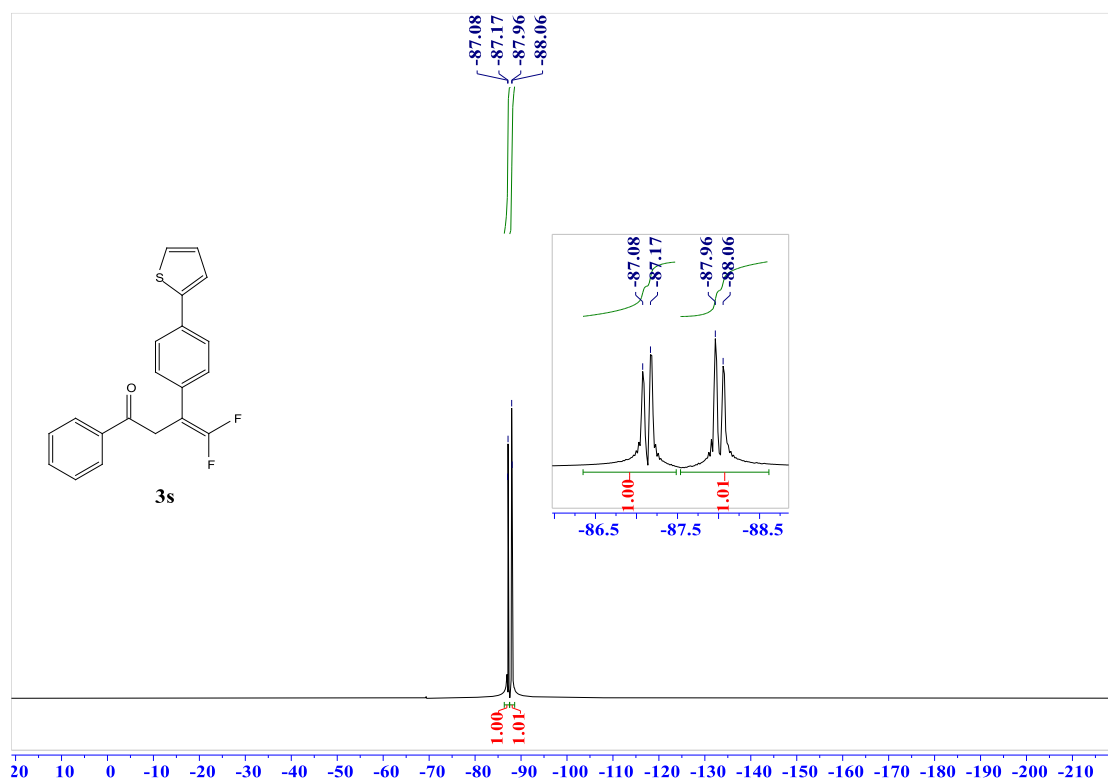

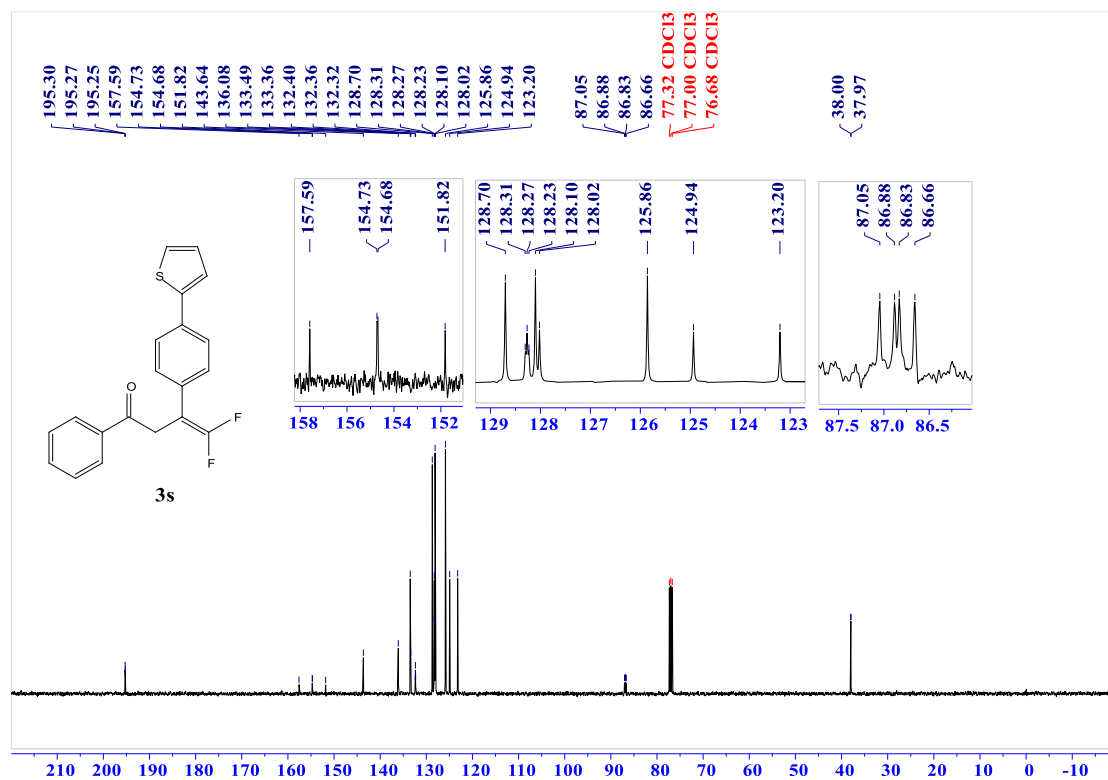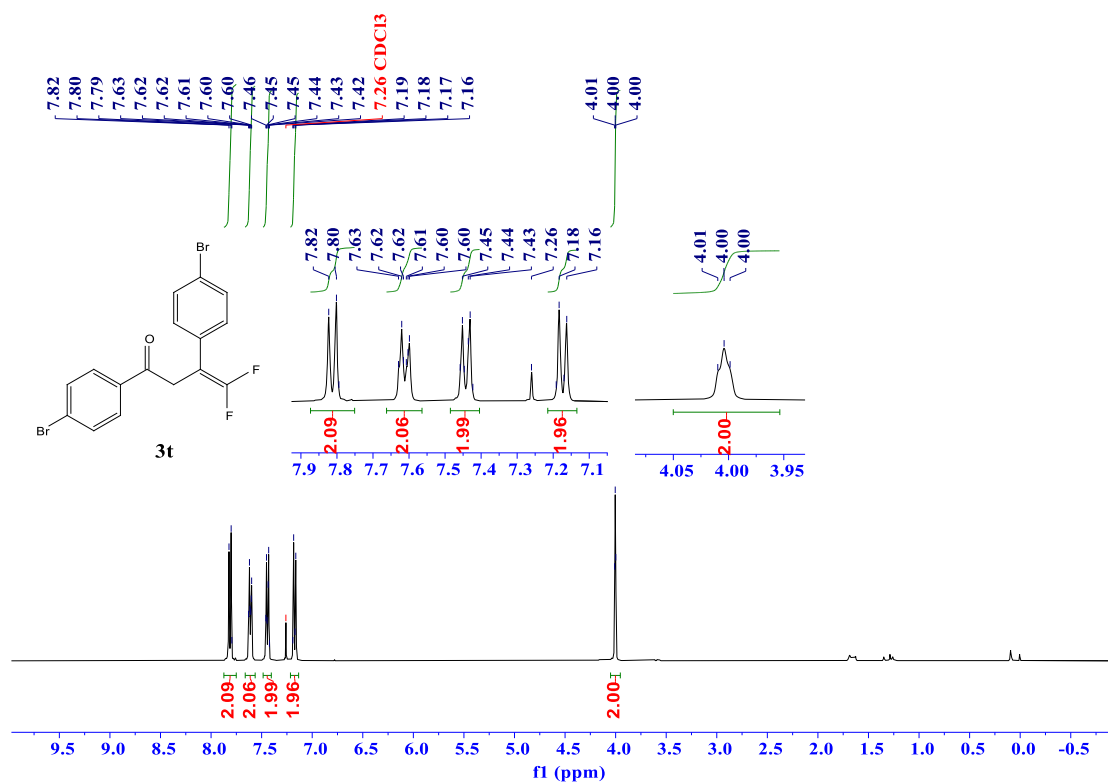

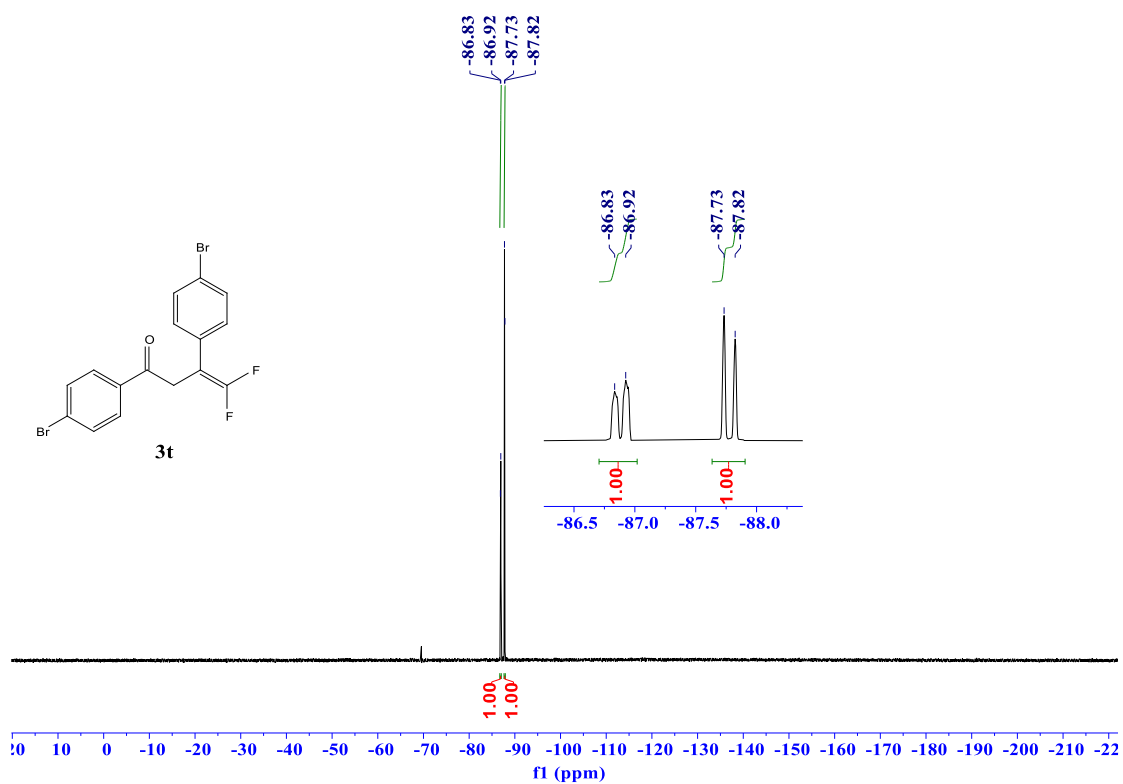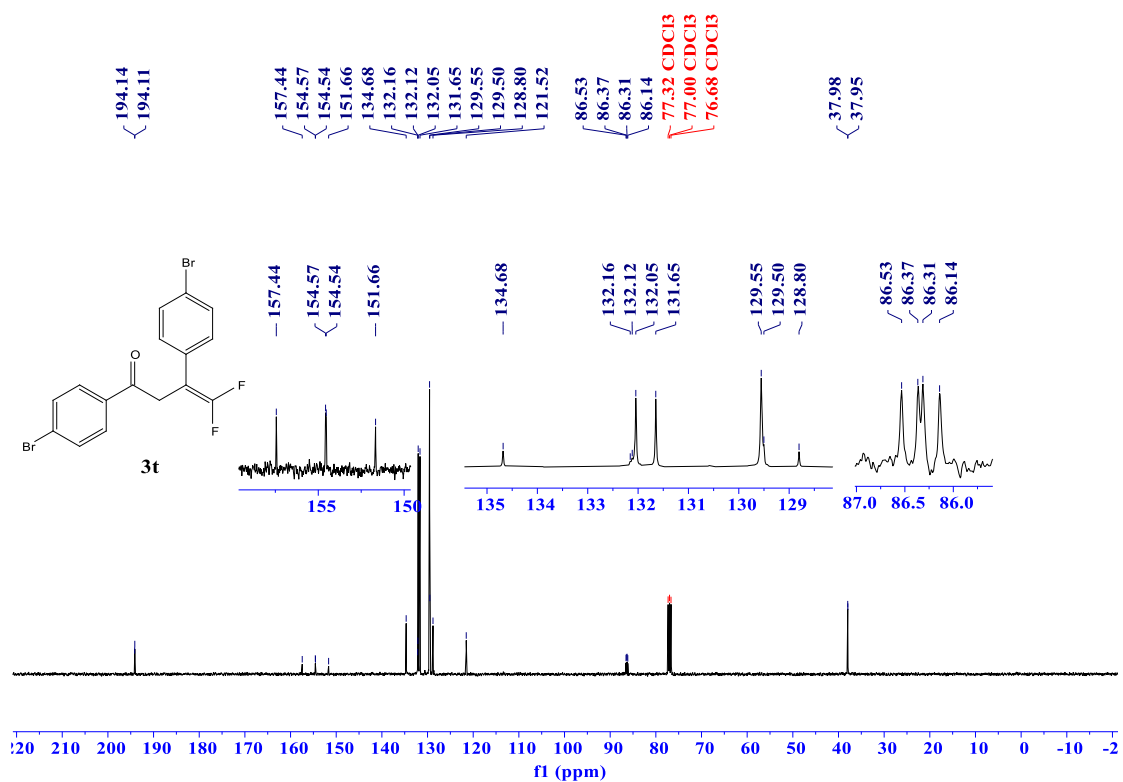

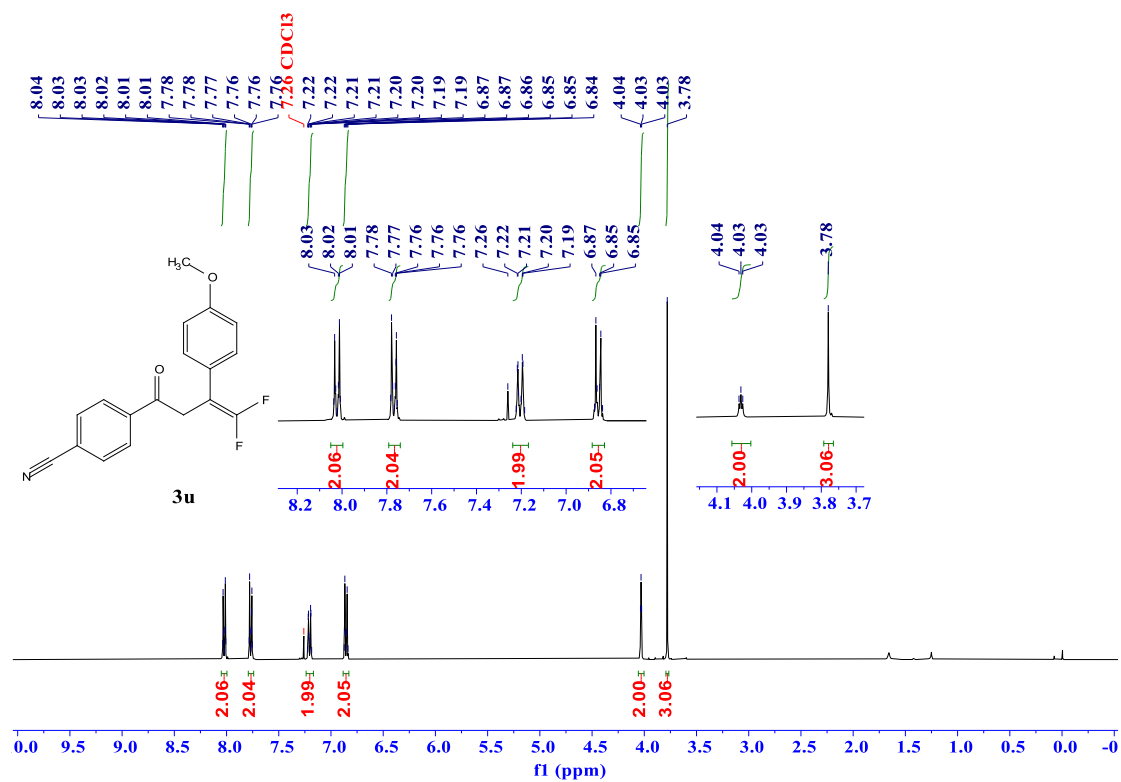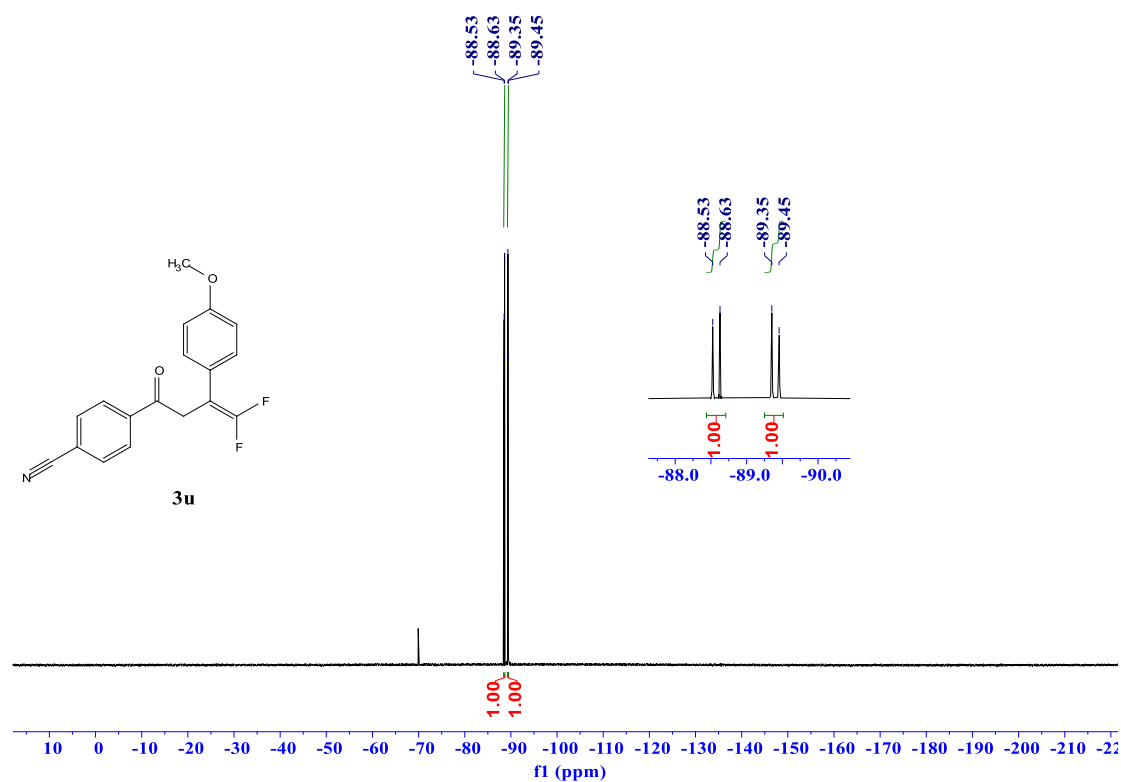

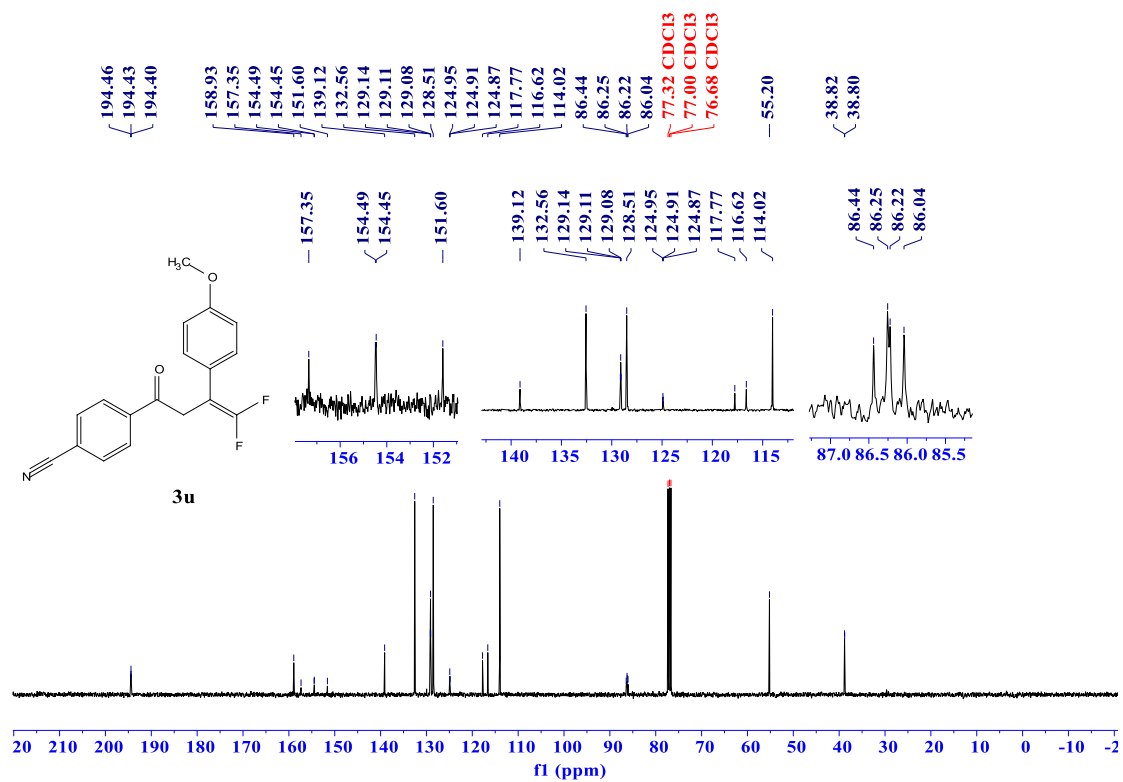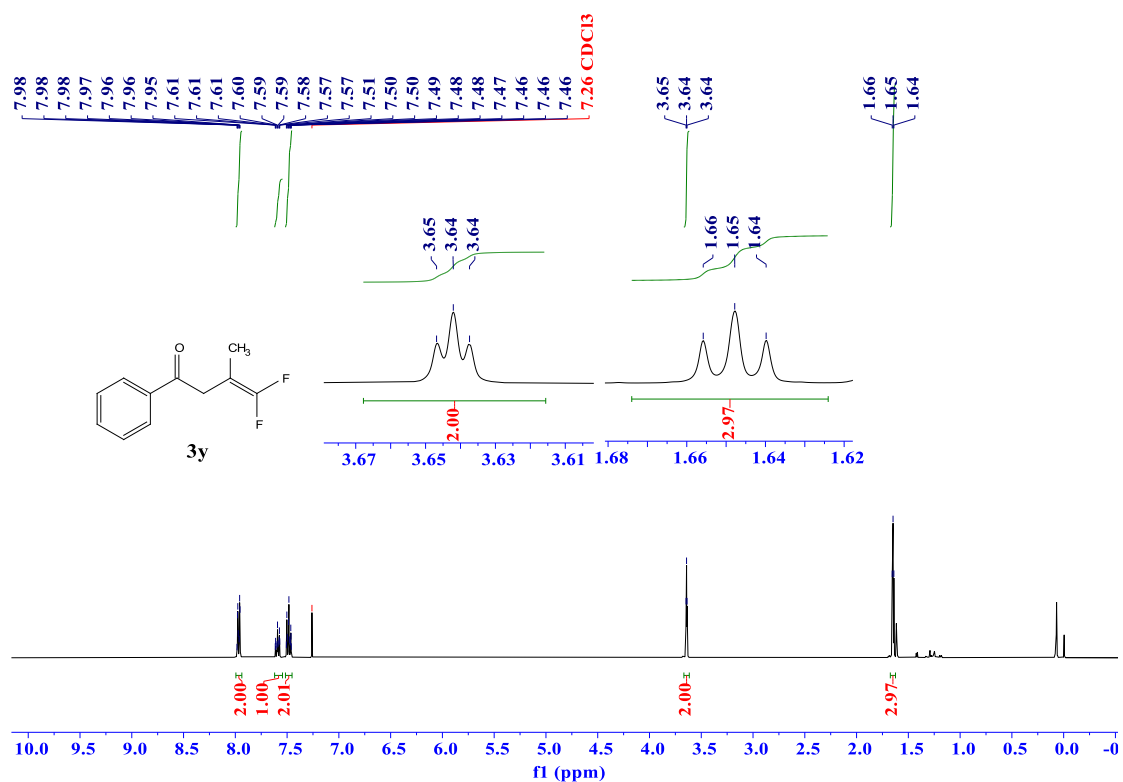

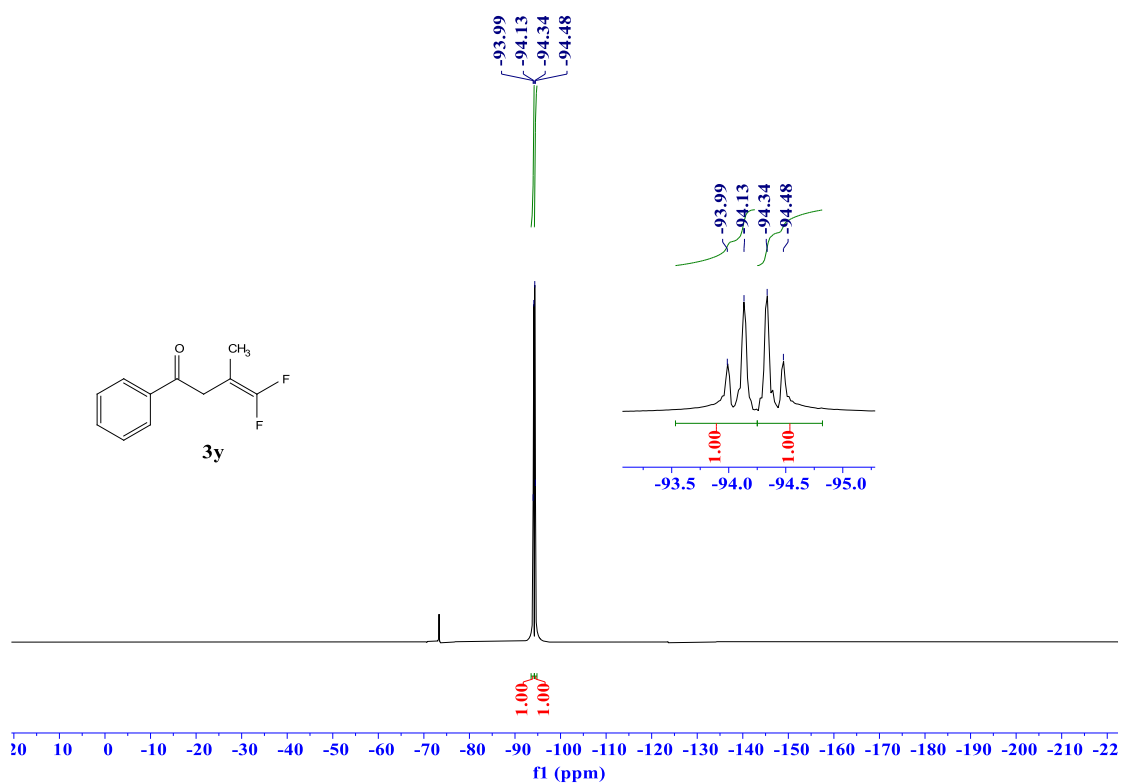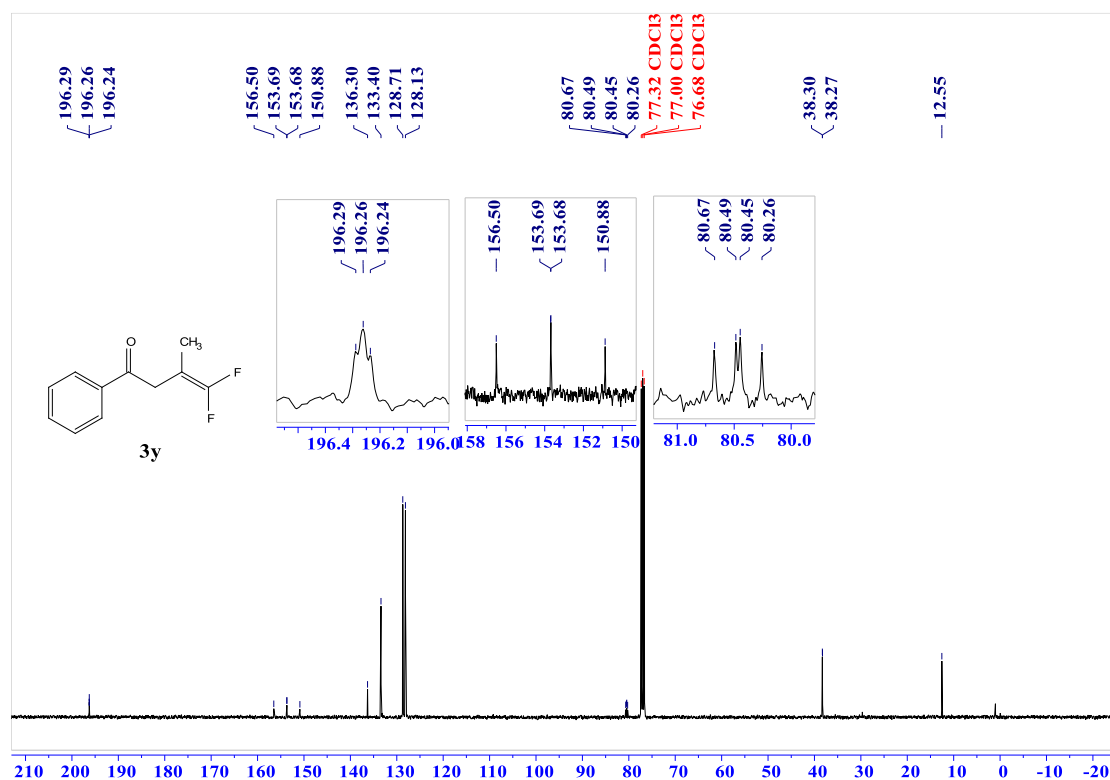

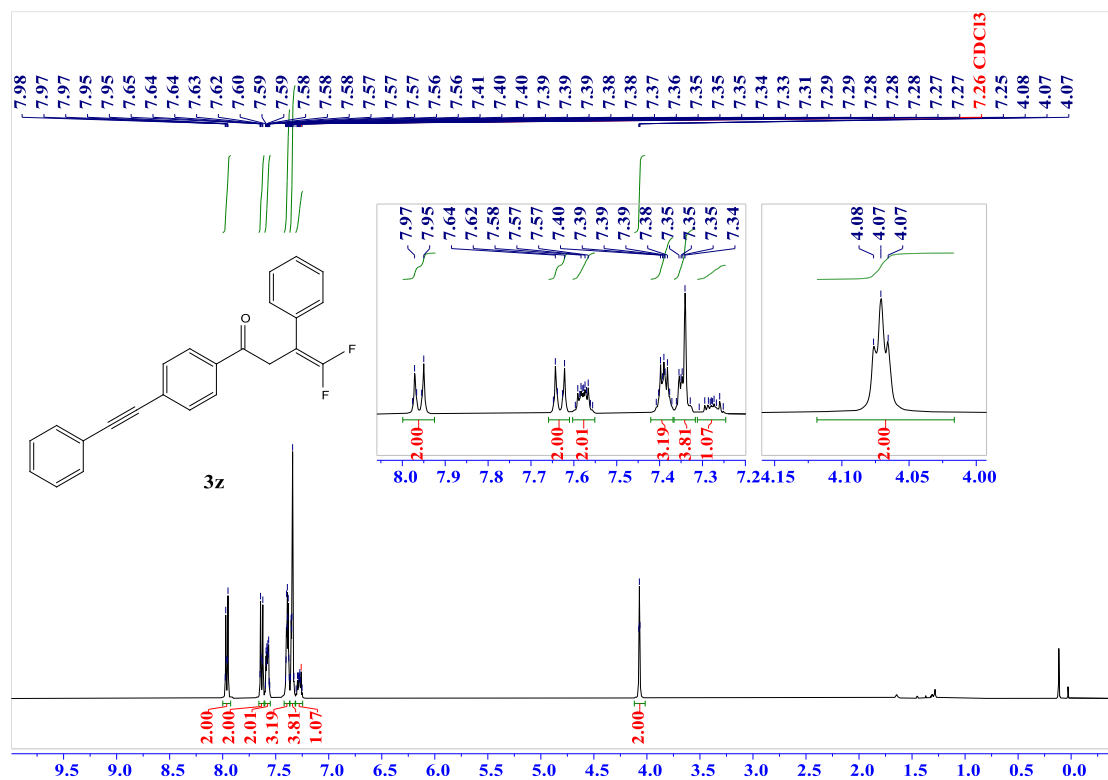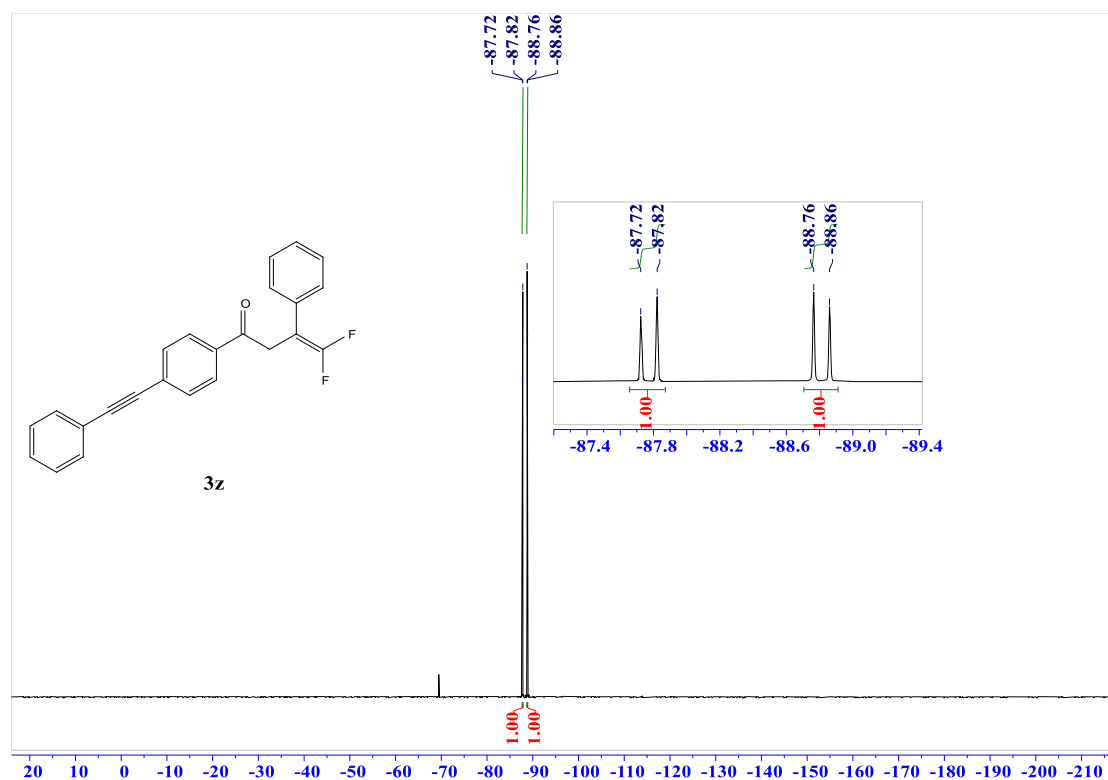

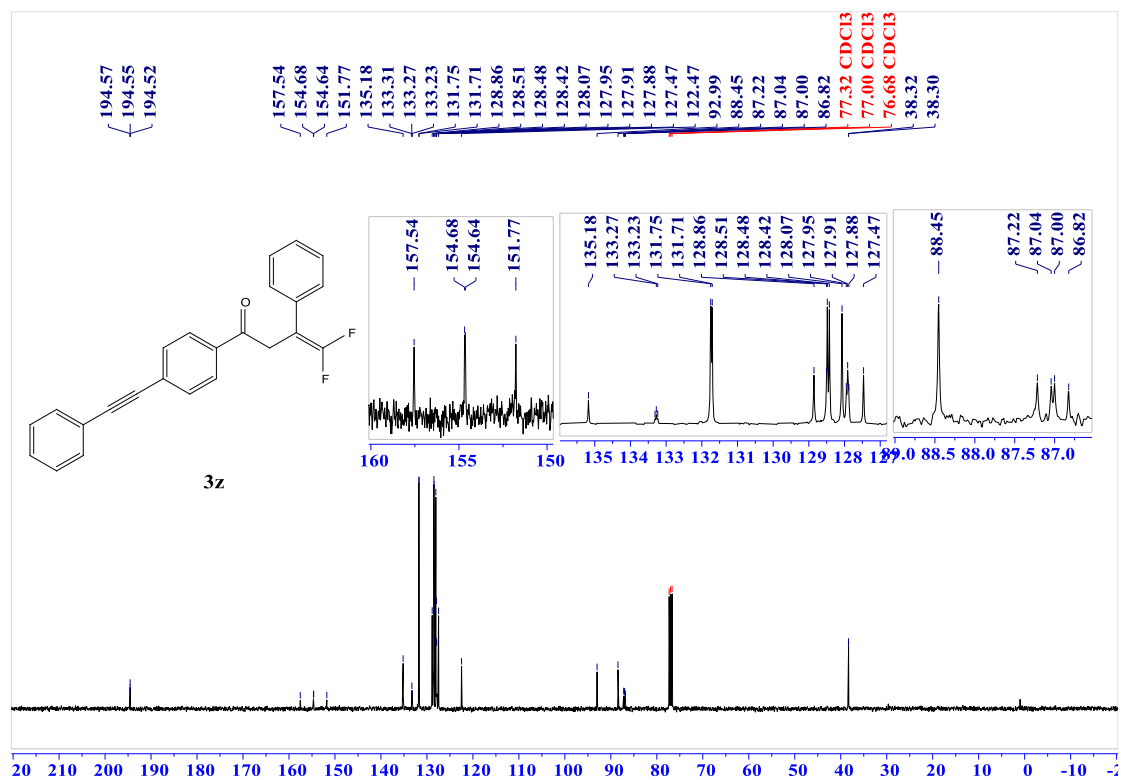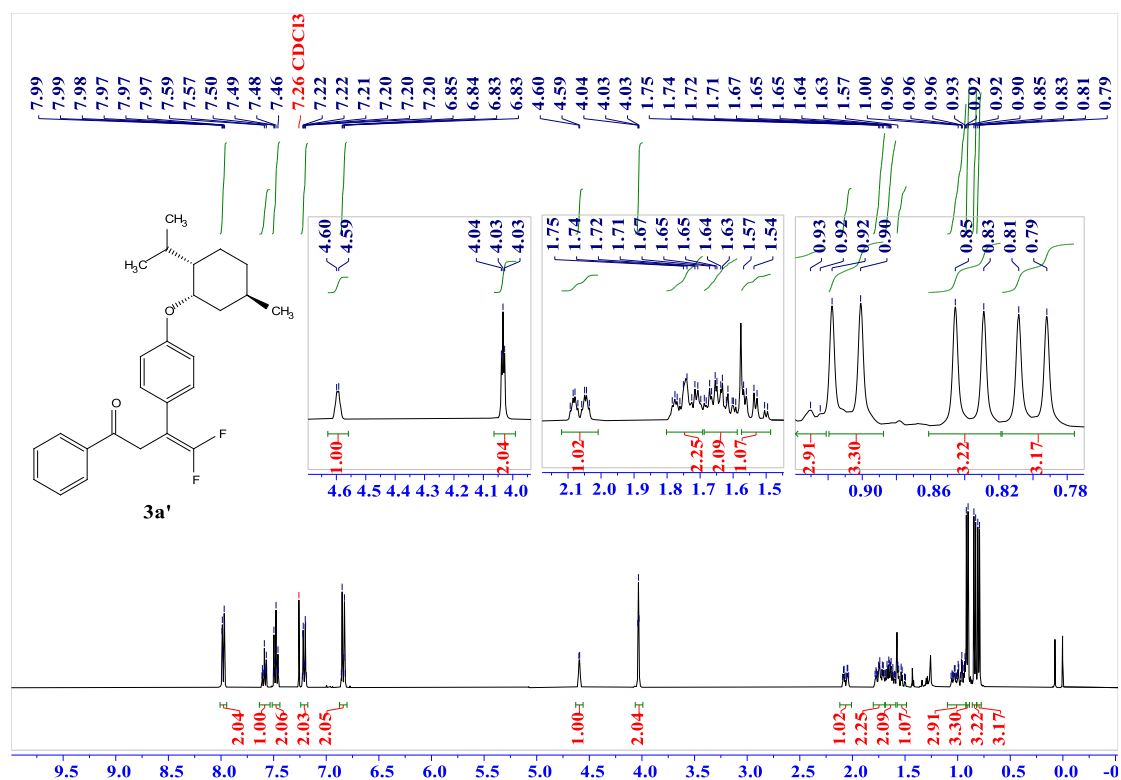

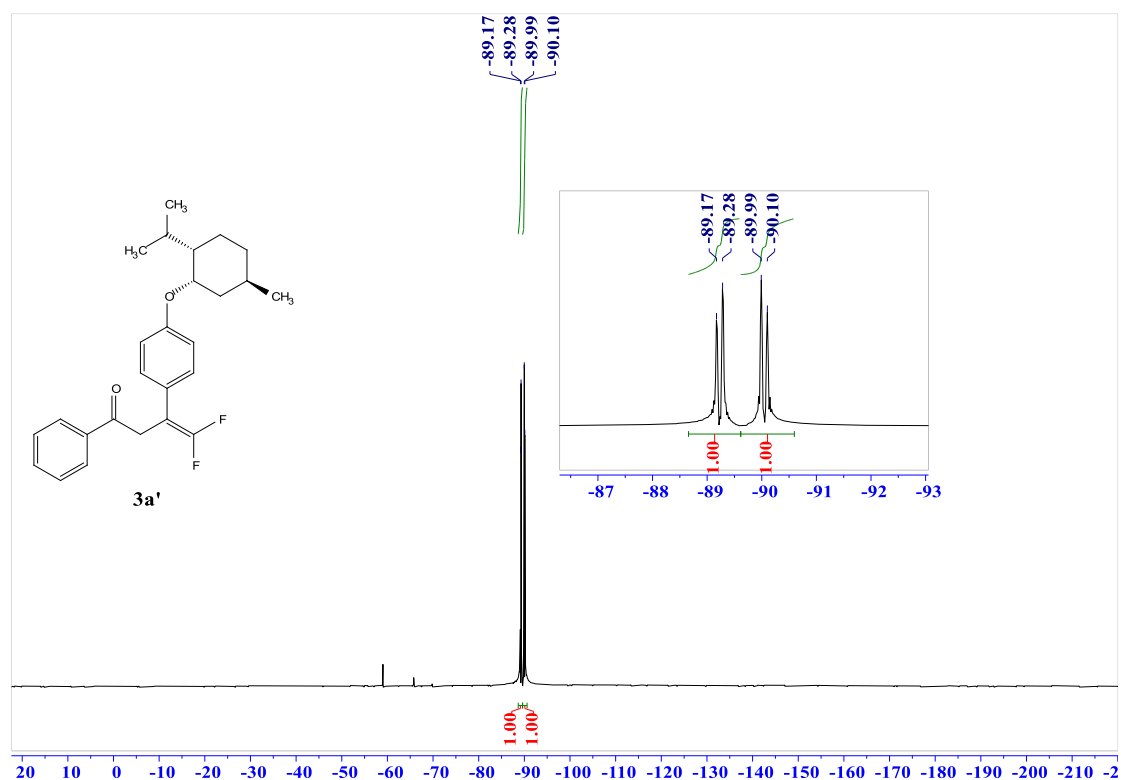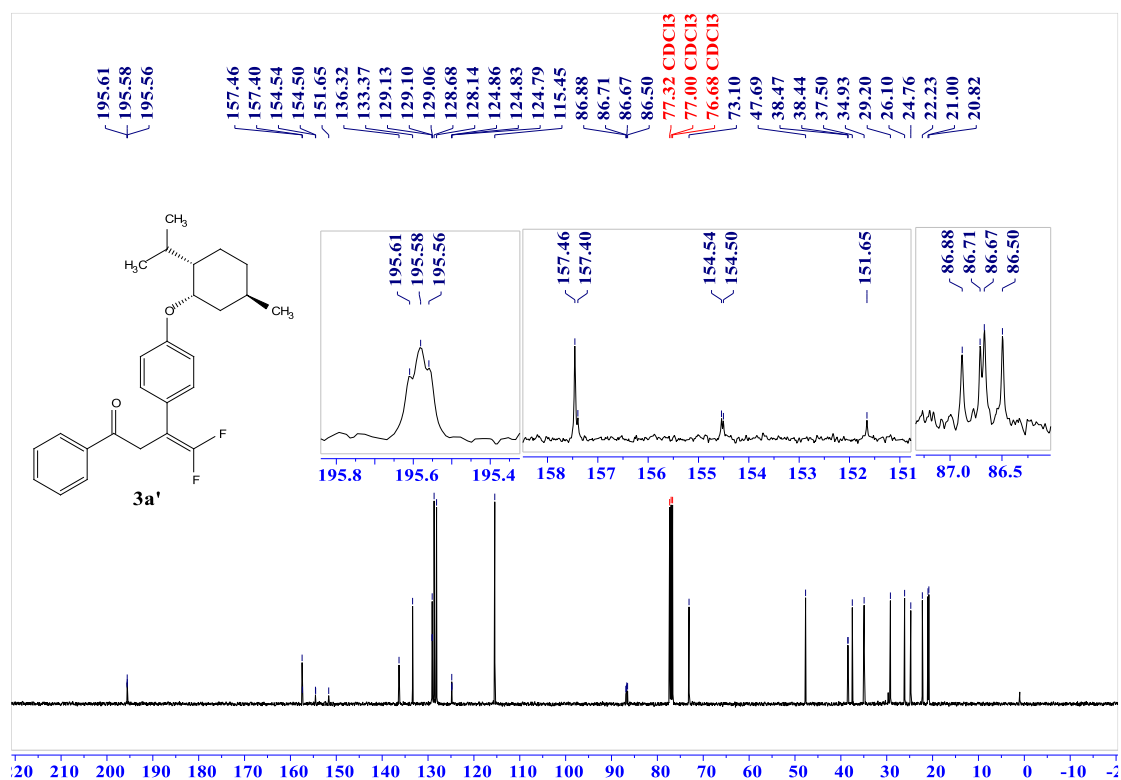

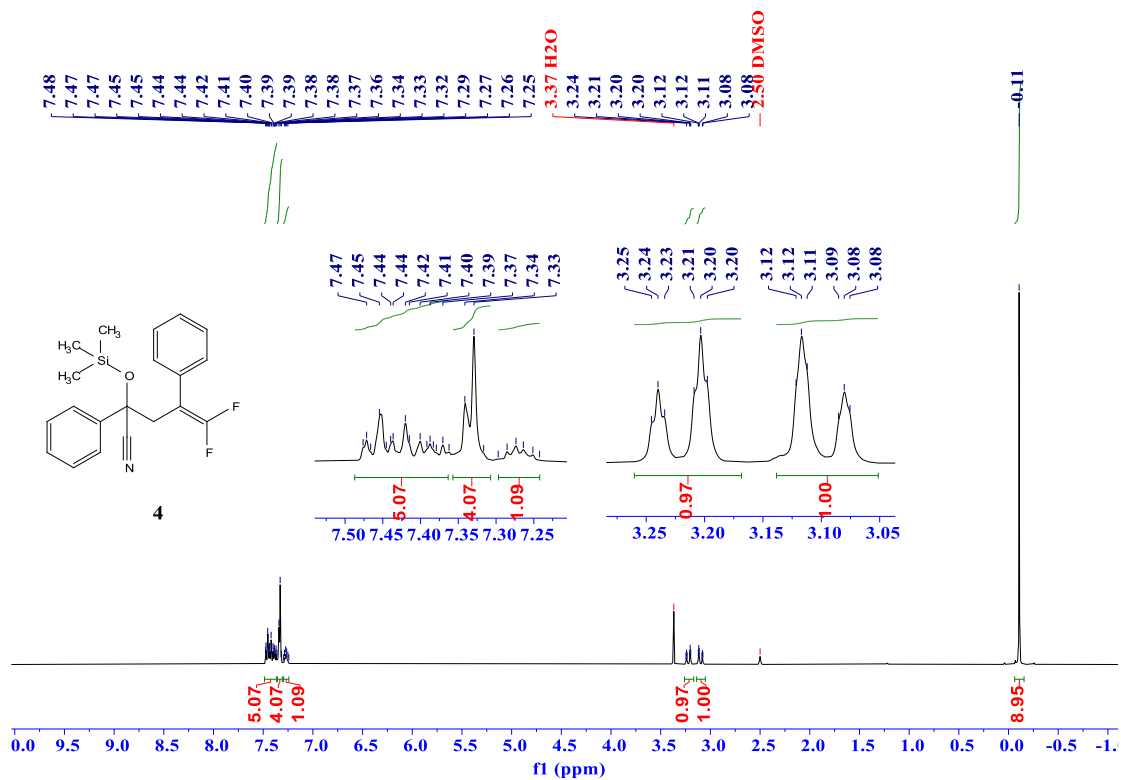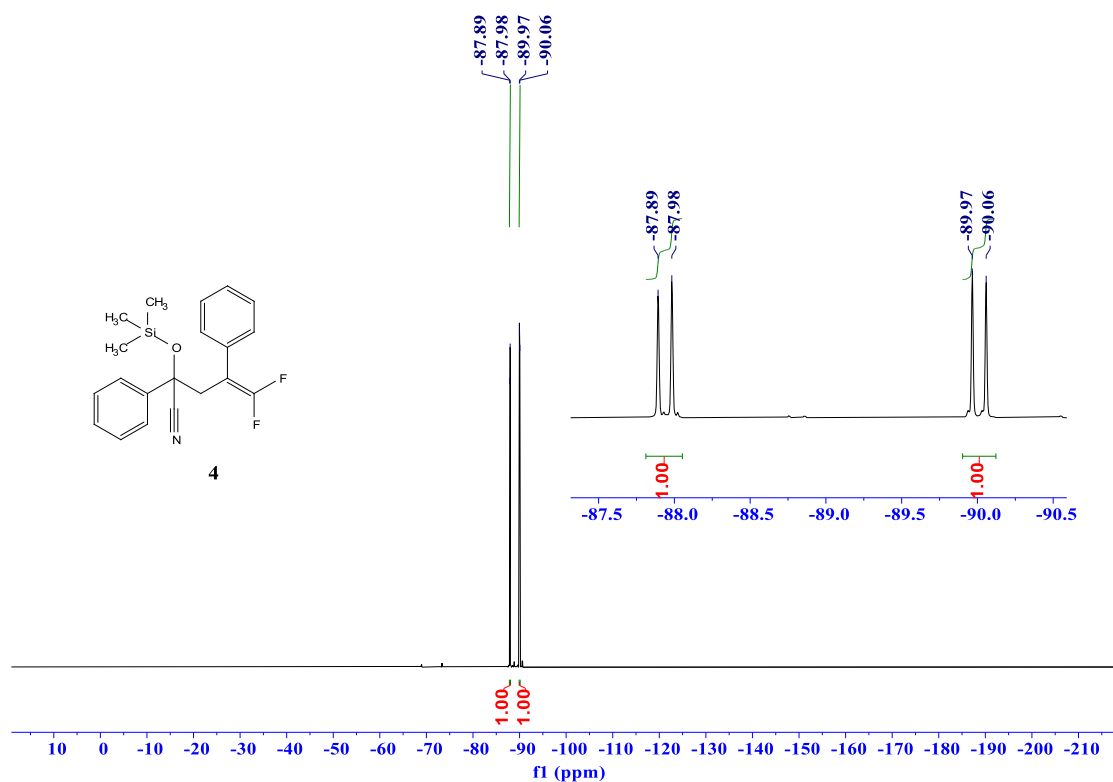



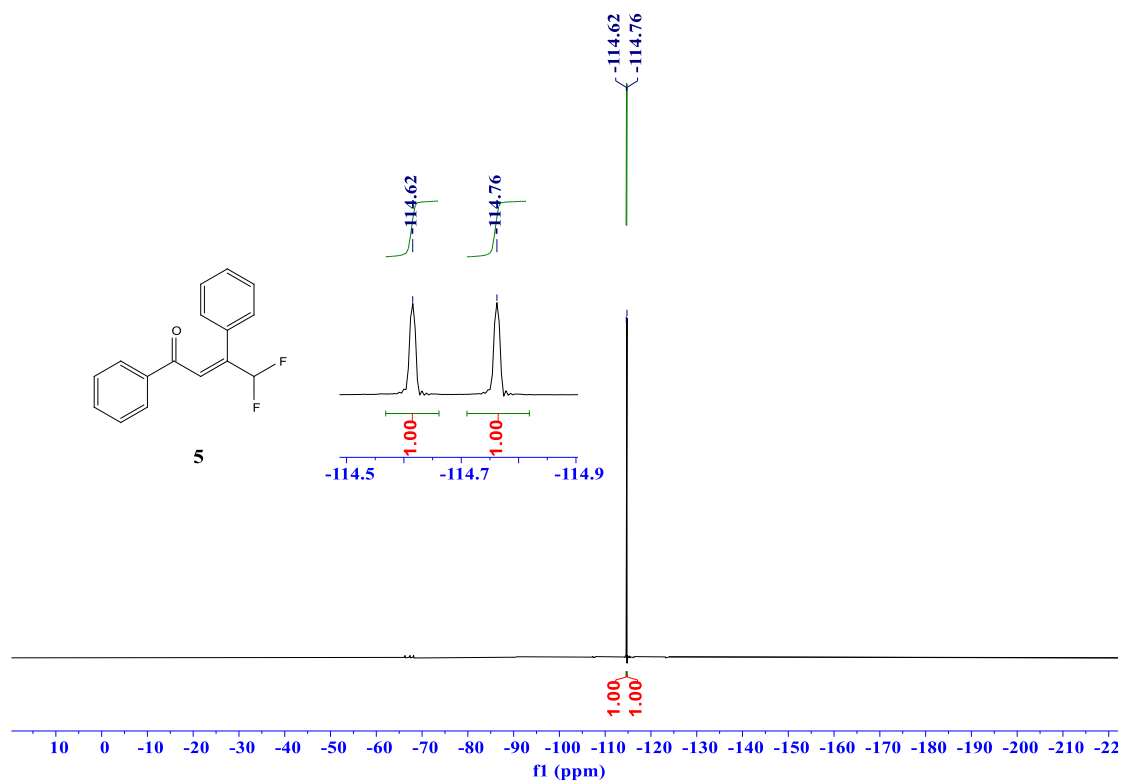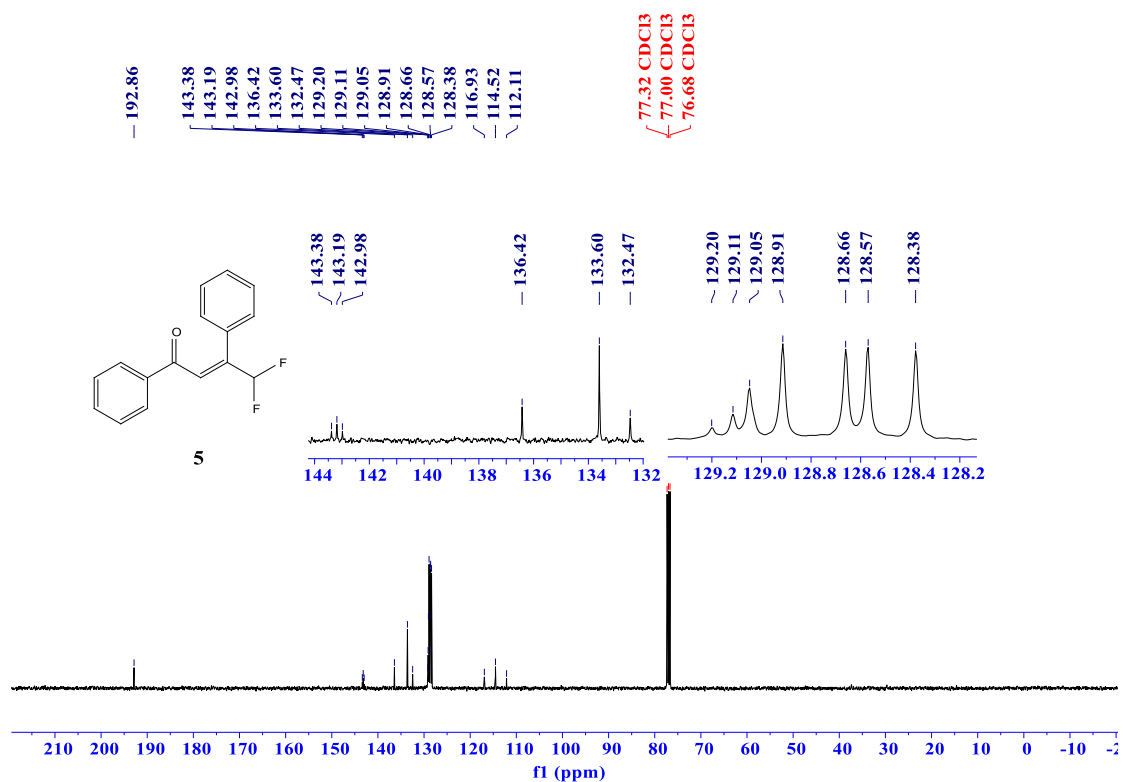

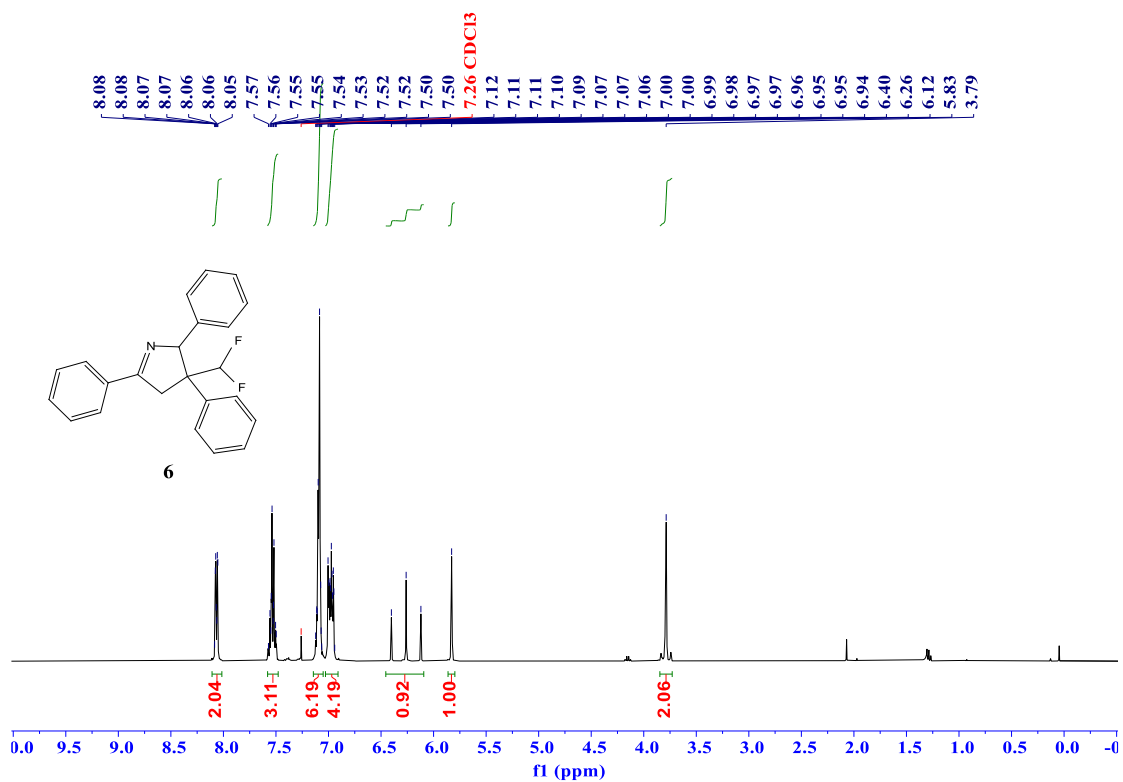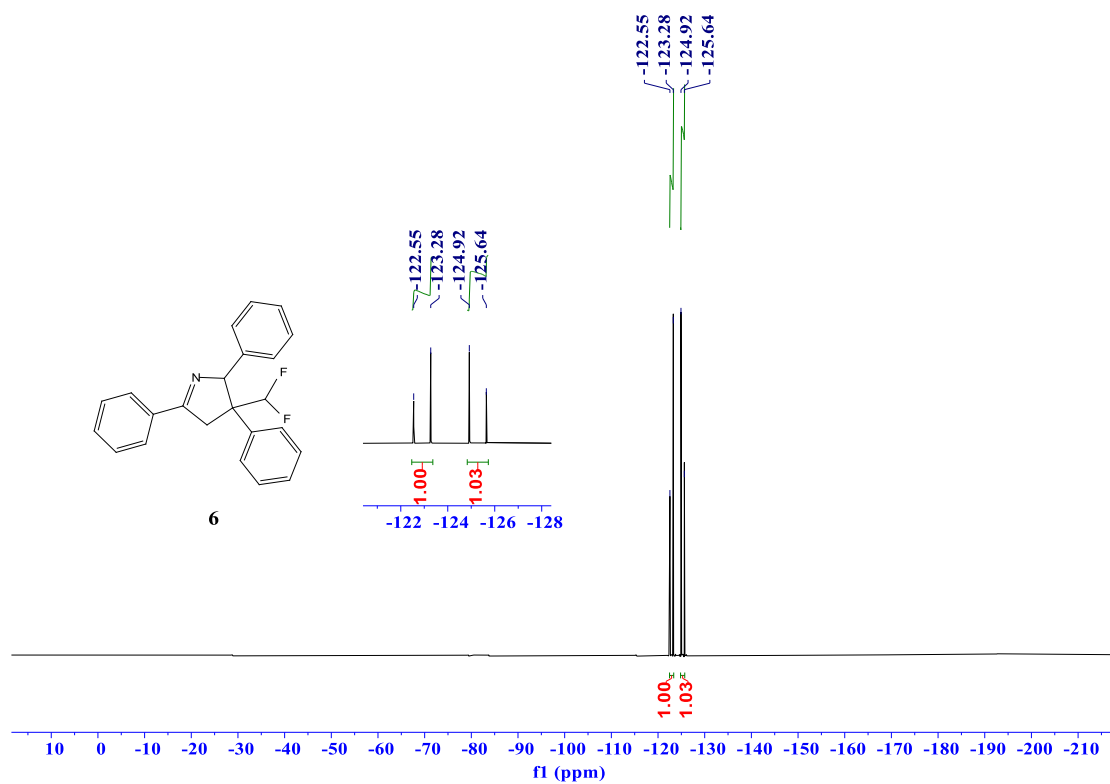

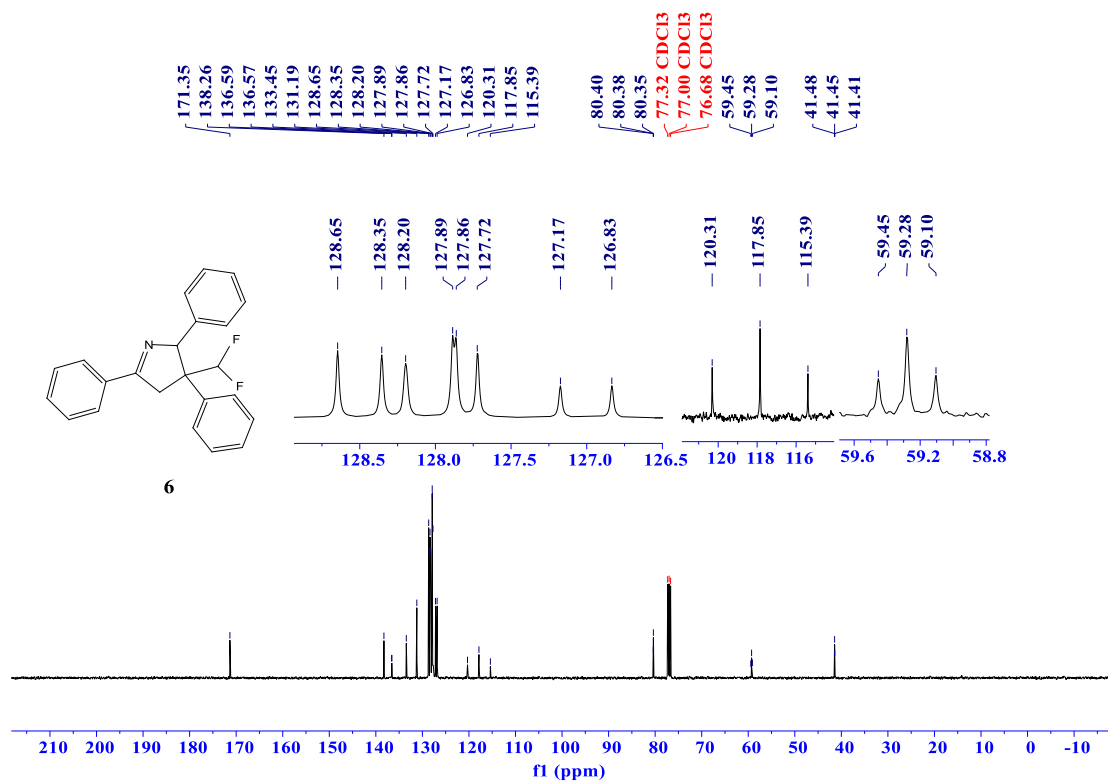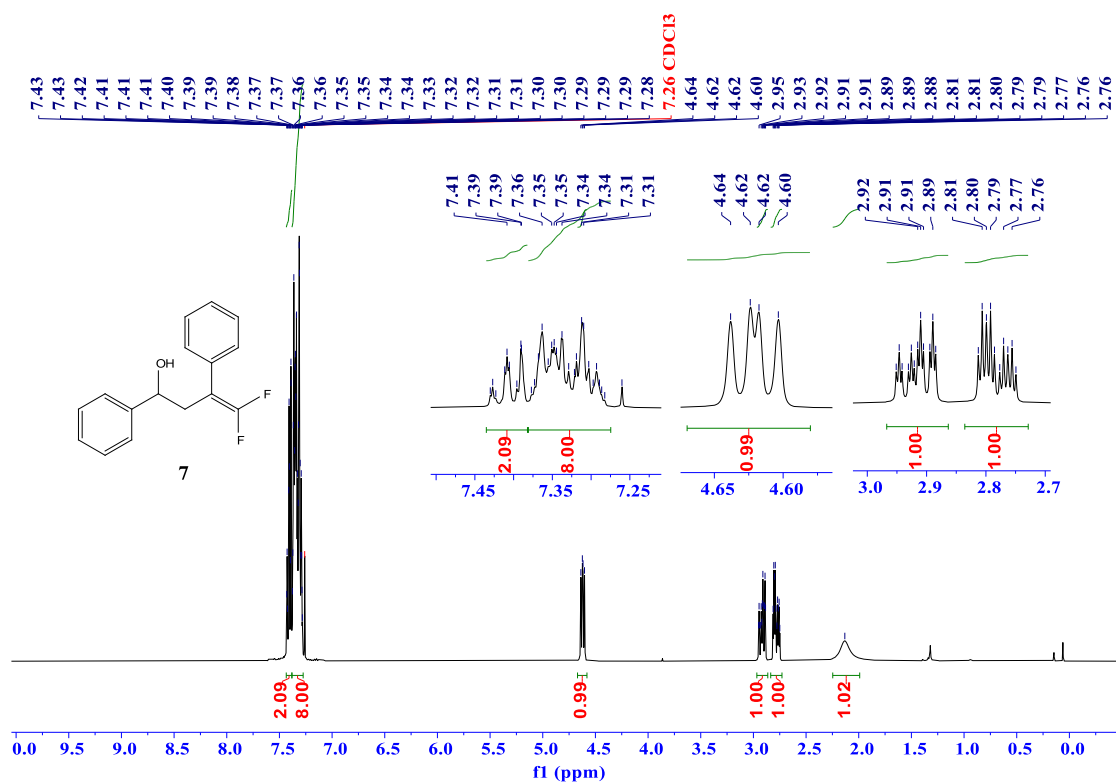

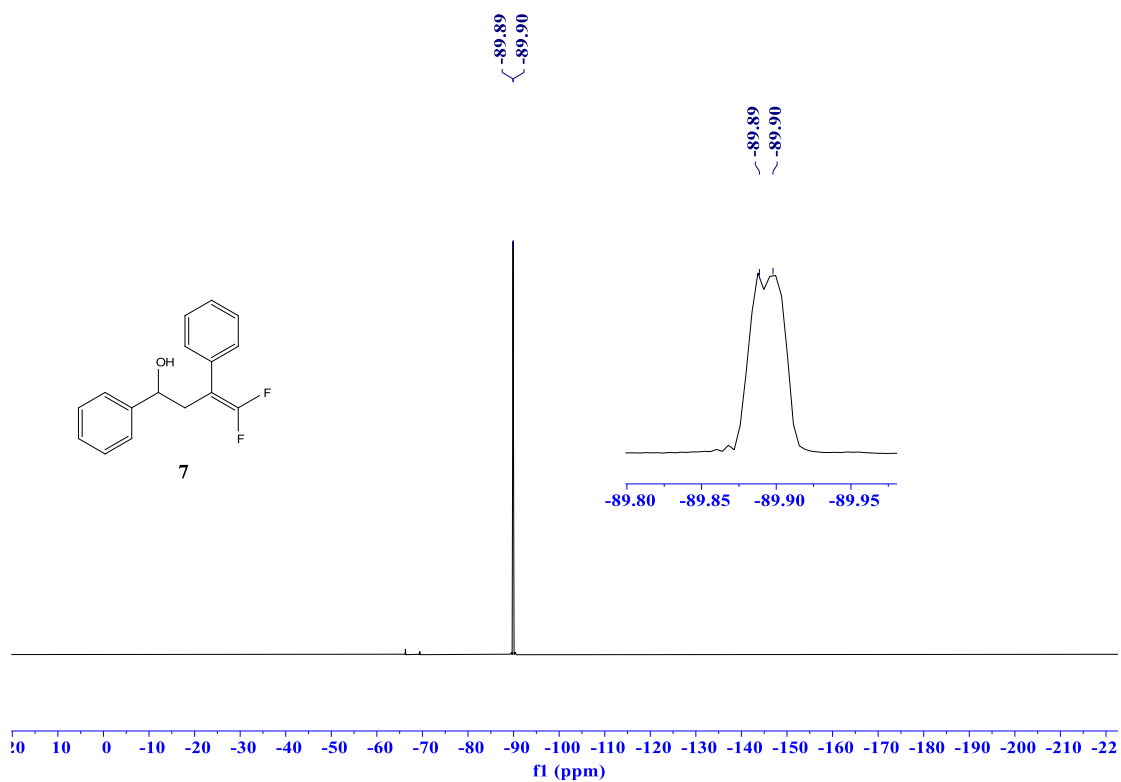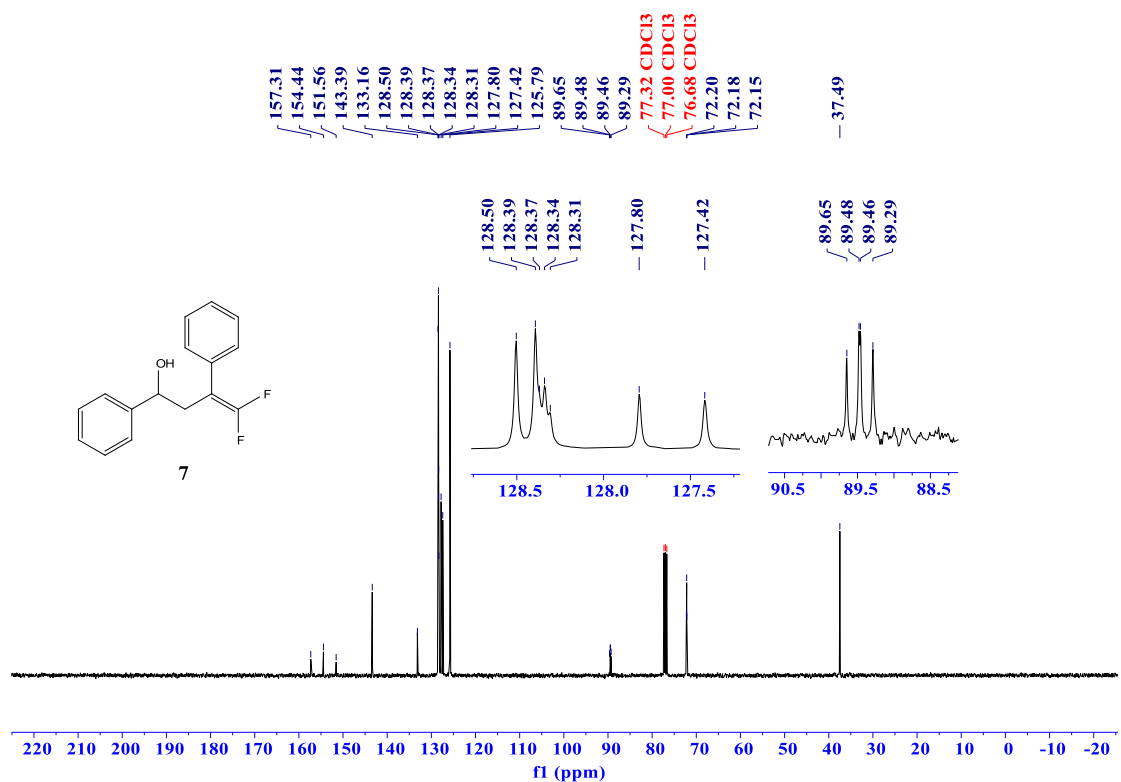

Supplement: d1gc04645d1.pdf [file d1gc04645d1.pdf]
